# Supplementary material for: Soluble dietary fibers from solid-state fermentation of wheat bran by the fungus Cordyceps cicadae and their effects on colitis mice
Source: Royal Society of Chemistry journal article supplement (doi:10.1039/d3fo03851c), 2023-12-11
Supplement: d3fo03851c1.xlsx [file d3fo03851c1.xlsx]

## Sheet: Chemical properties
Sample	Total sugar content (%)	Reducing sugar content (%)	Protein (%)	Uronic acid (%)
UFSDF-1	0.60303	0.00361437	0.0900815	0.0374046
UFSDF-2	0.589123	0.00361437	0.0881939	0.0414599
UFSDF-3	0.564518	0.00804013	0.0764328	0.044084
FSDF-1	0.650099	0.0198421	0.0285171	0.100143
FSDF-2	0.616937	0.0213174	0.0314211	0.108254
FSDF-3	0.64796	0.0250055	0.0318567	0.10062

## Sheet: HPLC
UFSDF			FSDF
Retention time (min)	Intensity(mV)		Retention time (min)	Intensity(mV)
0.025	0		0.025	0
0.03333	0		0.03333	0
0.04167	1		0.04167	1
0.05	0		0.05	2
0.05833	-1		0.05833	2
0.06667	-1		0.06667	2
0.075	0		0.075	1
0.08333	0		0.08333	2
0.09167	1		0.09167	2
0.1	2		0.1	2
0.10833	1		0.10833	2
0.11667	1		0.11667	2
0.125	2		0.125	1
0.13333	2		0.13333	0
0.14167	2		0.14167	1
0.15	2		0.15	1
0.15833	2		0.15833	2
0.16667	2		0.16667	3
0.175	2		0.175	3
0.18333	2		0.18333	2
0.19167	2		0.19167	2
0.2	2		0.2	1
0.20833	1		0.20833	1
0.21667	0		0.21667	2
0.225	0		0.225	2
0.23333	-1		0.23333	2
0.24167	-1		0.24167	2
0.25	-1		0.25	2
0.25833	-1		0.25833	3
0.26667	-1		0.26667	3
0.275	-1		0.275	3
0.28333	-1		0.28333	3
0.29167	-1		0.29167	3
0.3	-1		0.3	2
0.30833	-1		0.30833	1
0.31667	0		0.31667	0
0.325	0		0.325	0
0.33333	0		0.33333	-1
0.34167	0		0.34167	-1
0.35	-1		0.35	0
0.35833	-1		0.35833	-1
0.36667	-1		0.36667	-1
0.375	-1		0.375	-1
0.38333	-1		0.38333	0
0.39167	-2		0.39167	2
0.4	-2		0.4	3
0.40833	-3		0.40833	5
0.41667	-3		0.41667	6
0.425	-3		0.425	6
0.43333	-2		0.43333	4
0.44167	-1		0.44167	3
0.45	-2		0.45	2
0.45833	-2		0.45833	3
0.46667	-3		0.46667	3
0.475	-4		0.475	2
0.48333	-4		0.48333	2
0.49167	-3		0.49167	1
0.5	-2		0.5	0
0.50833	-2		0.50833	0
0.51667	-3		0.51667	1
0.525	-4		0.525	1
0.53333	-4		0.53333	1
0.54167	-4		0.54167	2
0.55	-4		0.55	2
0.55833	-3		0.55833	2
0.56667	-2		0.56667	2
0.575	-2		0.575	2
0.58333	-3		0.58333	2
0.59167	-4		0.59167	2
0.6	-4		0.6	2
0.60833	-3		0.60833	1
0.61667	-2		0.61667	1
0.625	-1		0.625	1
0.63333	-1		0.63333	1
0.64167	-1		0.64167	1
0.65	-2		0.65	1
0.65833	-2		0.65833	0
0.66667	-1		0.66667	-1
0.675	0		0.675	-2
0.68333	0		0.68333	-2
0.69167	0		0.69167	0
0.7	-1		0.7	1
0.70833	-3		0.70833	2
0.71667	-4		0.71667	1
0.725	-5		0.725	0
0.73333	-5		0.73333	-1
0.74167	-5		0.74167	-1
0.75	-5		0.75	0
0.75833	-4		0.75833	2
0.76667	-5		0.76667	4
0.775	-5		0.775	5
0.78333	-4		0.78333	5
0.79167	-3		0.79167	5
0.8	-2		0.8	4
0.80833	-2		0.80833	4
0.81667	-3		0.81667	4
0.825	-4		0.825	3
0.83333	-3		0.83333	2
0.84167	-2		0.84167	1
0.85	-1		0.85	0
0.85833	0		0.85833	0
0.86667	1		0.86667	1
0.875	1		0.875	2
0.88333	0		0.88333	3
0.89167	0		0.89167	3
0.9	1		0.9	4
0.90833	1		0.90833	4
0.91667	1		0.91667	3
0.925	0		0.925	3
0.93333	-1		0.93333	3
0.94167	-2		0.94167	2
0.95	-3		0.95	2
0.95833	-3		0.95833	1
0.96667	-2		0.96667	0
0.975	-1		0.975	0
0.98333	1		0.98333	1
0.99167	1		0.99167	1
1	1		1	2
1.00833	0		1.00833	2
1.01667	-1		1.01667	1
1.025	-1		1.025	0
1.03333	-1		1.03333	0
1.04167	0		1.04167	-1
1.05	0		1.05	-1
1.05833	1		1.05833	-1
1.06667	1		1.06667	-1
1.075	1		1.075	-1
1.08333	1		1.08333	-2
1.09167	1		1.09167	-1
1.1	1		1.1	0
1.10833	0		1.10833	2
1.11667	0		1.11667	3
1.125	-1		1.125	3
1.13333	-2		1.13333	1
1.14167	-2		1.14167	0
1.15	-1		1.15	0
1.15833	-1		1.15833	1
1.16667	-1		1.16667	2
1.175	-2		1.175	3
1.18333	-3		1.18333	4
1.19167	-3		1.19167	4
1.2	-2		1.2	3
1.20833	-2		1.20833	1
1.21667	-1		1.21667	1
1.225	-2		1.225	1
1.23333	-3		1.23333	2
1.24167	-4		1.24167	3
1.25	-5		1.25	4
1.25833	-5		1.25833	3
1.26667	-4		1.26667	2
1.275	-3		1.275	2
1.28333	-3		1.28333	2
1.29167	-4		1.29167	2
1.3	-5		1.3	3
1.30833	-6		1.30833	3
1.31667	-5		1.31667	2
1.325	-5		1.325	2
1.33333	-4		1.33333	2
1.34167	-4		1.34167	3
1.35	-5		1.35	4
1.35833	-5		1.35833	4
1.36667	-4		1.36667	3
1.375	-4		1.375	2
1.38333	-3		1.38333	1
1.39167	-3		1.39167	2
1.4	-2		1.4	2
1.40833	-3		1.40833	2
1.41667	-3		1.41667	2
1.425	-4		1.425	1
1.43333	-3		1.43333	1
1.44167	-2		1.44167	1
1.45	0		1.45	1
1.45833	1		1.45833	2
1.46667	0		1.46667	3
1.475	1		1.475	3
1.48333	0		1.48333	3
1.49167	0		1.49167	2
1.5	0		1.5	1
1.50833	-1		1.50833	1
1.51667	-1		1.51667	1
1.525	-2		1.525	0
1.53333	-3		1.53333	0
1.54167	-3		1.54167	0
1.55	-3		1.55	0
1.55833	-2		1.55833	1
1.56667	-1		1.56667	1
1.575	-1		1.575	1
1.58333	-1		1.58333	2
1.59167	-1		1.59167	2
1.6	-1		1.6	2
1.60833	-1		1.60833	1
1.61667	-1		1.61667	1
1.625	0		1.625	1
1.63333	0		1.63333	2
1.64167	0		1.64167	2
1.65	-1		1.65	2
1.65833	-2		1.65833	2
1.66667	-2		1.66667	1
1.675	-1		1.675	0
1.68333	0		1.68333	0
1.69167	1		1.69167	0
1.7	1		1.7	1
1.70833	1		1.70833	2
1.71667	2		1.71667	2
1.725	2		1.725	1
1.73333	3		1.73333	0
1.74167	4		1.74167	0
1.75	4		1.75	0
1.75833	4		1.75833	-1
1.76667	2		1.76667	0
1.775	2		1.775	0
1.78333	1		1.78333	0
1.79167	1		1.79167	0
1.8	1		1.8	2
1.80833	1		1.80833	3
1.81667	0		1.81667	3
1.825	0		1.825	3
1.83333	0		1.83333	3
1.84167	0		1.84167	3
1.85	0		1.85	2
1.85833	1		1.85833	2
1.86667	2		1.86667	2
1.875	1		1.875	2
1.88333	1		1.88333	1
1.89167	0		1.89167	1
1.9	1		1.9	0
1.90833	2		1.90833	-2
1.91667	3		1.91667	-2
1.925	3		1.925	-1
1.93333	3		1.93333	0
1.94167	2		1.94167	1
1.95	2		1.95	1
1.95833	2		1.95833	1
1.96667	2		1.96667	1
1.975	2		1.975	1
1.98333	2		1.98333	1
1.99167	1		1.99167	1
2	0		2	1
2.00833	-1		2.00833	1
2.01667	0		2.01667	0
2.025	0		2.025	-2
2.03333	1		2.03333	-3
2.04167	2		2.04167	-3
2.05	2		2.05	-2
2.05833	2		2.05833	-1
2.06667	2		2.06667	0
2.075	1		2.075	-1
2.08333	1		2.08333	-2
2.09167	2		2.09167	-2
2.1	2		2.1	0
2.10833	2		2.10833	1
2.11667	2		2.11667	2
2.125	2		2.125	1
2.13333	2		2.13333	1
2.14167	3		2.14167	0
2.15	4		2.15	0
2.15833	5		2.15833	0
2.16667	6		2.16667	0
2.175	6		2.175	0
2.18333	6		2.18333	0
2.19167	6		2.19167	0
2.2	7		2.2	0
2.20833	8		2.20833	-1
2.21667	8		2.21667	-1
2.225	8		2.225	-1
2.23333	7		2.23333	-1
2.24167	6		2.24167	-1
2.25	6		2.25	-1
2.25833	5		2.25833	-1
2.26667	5		2.26667	-2
2.275	6		2.275	-1
2.28333	6		2.28333	0
2.29167	6		2.29167	1
2.3	5		2.3	1
2.30833	5		2.30833	1
2.31667	4		2.31667	0
2.325	4		2.325	-1
2.33333	4		2.33333	-1
2.34167	4		2.34167	-1
2.35	3		2.35	0
2.35833	2		2.35833	1
2.36667	2		2.36667	1
2.375	1		2.375	0
2.38333	3		2.38333	-1
2.39167	5		2.39167	-1
2.4	6		2.4	-1
2.40833	6		2.40833	0
2.41667	5		2.41667	1
2.425	5		2.425	0
2.43333	6		2.43333	0
2.44167	6		2.44167	0
2.45	7		2.45	0
2.45833	7		2.45833	0
2.46667	6		2.46667	1
2.475	6		2.475	2
2.48333	6		2.48333	1
2.49167	6		2.49167	1
2.5	7		2.5	0
2.50833	8		2.50833	0
2.51667	8		2.51667	0
2.525	7		2.525	-1
2.53333	6		2.53333	-1
2.54167	6		2.54167	0
2.55	6		2.55	0
2.55833	7		2.55833	0
2.56667	7		2.56667	1
2.575	8		2.575	1
2.58333	8		2.58333	1
2.59167	8		2.59167	0
2.6	7		2.6	-1
2.60833	7		2.60833	-2
2.61667	7		2.61667	-3
2.625	8		2.625	-4
2.63333	9		2.63333	-5
2.64167	10		2.64167	-4
2.65	9		2.65	-4
2.65833	9		2.65833	-3
2.66667	8		2.66667	-2
2.675	8		2.675	-2
2.68333	7		2.68333	-1
2.69167	7		2.69167	-1
2.7	7		2.7	-1
2.70833	7		2.70833	-1
2.71667	6		2.71667	0
2.725	5		2.725	0
2.73333	6		2.73333	-1
2.74167	7		2.74167	-1
2.75	7		2.75	-1
2.75833	7		2.75833	1
2.76667	7		2.76667	2
2.775	7		2.775	2
2.78333	8		2.78333	2
2.79167	8		2.79167	1
2.8	9		2.8	1
2.80833	9		2.80833	2
2.81667	9		2.81667	2
2.825	8		2.825	3
2.83333	7		2.83333	2
2.84167	6		2.84167	2
2.85	7		2.85	1
2.85833	7		2.85833	0
2.86667	7		2.86667	0
2.875	7		2.875	1
2.88333	7		2.88333	1
2.89167	7		2.89167	1
2.9	6		2.9	0
2.90833	6		2.90833	-1
2.91667	6		2.91667	0
2.925	6		2.925	1
2.93333	6		2.93333	3
2.94167	6		2.94167	4
2.95	6		2.95	4
2.95833	6		2.95833	4
2.96667	7		2.96667	3
2.975	8		2.975	2
2.98333	8		2.98333	1
2.99167	8		2.99167	0
3	7		3	0
3.00833	6		3.00833	0
3.01667	5		3.01667	-1
3.025	5		3.025	-1
3.03333	6		3.03333	0
3.04167	7		3.04167	1
3.05	8		3.05	2
3.05833	8		3.05833	3
3.06667	7		3.06667	4
3.075	7		3.075	4
3.08333	7		3.08333	3
3.09167	8		3.09167	4
3.1	9		3.1	5
3.10833	9		3.10833	6
3.11667	9		3.11667	6
3.125	8		3.125	5
3.13333	8		3.13333	3
3.14167	7		3.14167	2
3.15	8		3.15	1
3.15833	8		3.15833	2
3.16667	9		3.16667	2
3.175	9		3.175	2
3.18333	8		3.18333	2
3.19167	8		3.19167	2
3.2	8		3.2	1
3.20833	9		3.20833	-1
3.21667	9		3.21667	-1
3.225	10		3.225	-1
3.23333	10		3.23333	0
3.24167	9		3.24167	1
3.25	9		3.25	2
3.25833	9		3.25833	2
3.26667	9		3.26667	2
3.275	9		3.275	2
3.28333	10		3.28333	3
3.29167	11		3.29167	3
3.3	11		3.3	4
3.30833	12		3.30833	3
3.31667	12		3.31667	1
3.325	13		3.325	-1
3.33333	14		3.33333	-1
3.34167	15		3.34167	0
3.35	15		3.35	1
3.35833	14		3.35833	1
3.36667	12		3.36667	1
3.375	11		3.375	0
3.38333	11		3.38333	-1
3.39167	12		3.39167	-1
3.4	12		3.4	-1
3.40833	12		3.40833	0
3.41667	12		3.41667	2
3.425	12		3.425	2
3.43333	12		3.43333	1
3.44167	13		3.44167	0
3.45	13		3.45	0
3.45833	13		3.45833	0
3.46667	13		3.46667	1
3.475	12		3.475	2
3.48333	12		3.48333	2
3.49167	11		3.49167	2
3.5	11		3.5	1
3.50833	12		3.50833	1
3.51667	13		3.51667	0
3.525	12		3.525	1
3.53333	10		3.53333	2
3.54167	9		3.54167	2
3.55	9		3.55	1
3.55833	10		3.55833	0
3.56667	12		3.56667	1
3.575	13		3.575	1
3.58333	14		3.58333	2
3.59167	13		3.59167	2
3.6	13		3.6	3
3.60833	13		3.60833	3
3.61667	14		3.61667	3
3.625	15		3.625	3
3.63333	16		3.63333	3
3.64167	16		3.64167	4
3.65	15		3.65	5
3.65833	13		3.65833	6
3.66667	12		3.66667	5
3.675	12		3.675	5
3.68333	13		3.68333	4
3.69167	13		3.69167	4
3.7	13		3.7	5
3.70833	13		3.70833	5
3.71667	12		3.71667	6
3.725	13		3.725	6
3.73333	13		3.73333	6
3.74167	14		3.74167	5
3.75	14		3.75	5
3.75833	14		3.75833	5
3.76667	14		3.76667	5
3.775	13		3.775	4
3.78333	13		3.78333	3
3.79167	15		3.79167	1
3.8	16		3.8	0
3.80833	16		3.80833	0
3.81667	16		3.81667	2
3.825	15		3.825	3
3.83333	14		3.83333	4
3.84167	13		3.84167	5
3.85	13		3.85	4
3.85833	14		3.85833	4
3.86667	16		3.86667	4
3.875	16		3.875	4
3.88333	15		3.88333	4
3.89167	14		3.89167	4
3.9	13		3.9	4
3.90833	13		3.90833	3
3.91667	14		3.91667	3
3.925	14		3.925	4
3.93333	16		3.93333	6
3.94167	16		3.94167	8
3.95	16		3.95	8
3.95833	16		3.95833	8
3.96667	16		3.96667	6
3.975	16		3.975	5
3.98333	16		3.98333	4
3.99167	16		3.99167	4
4	16		4	5
4.00833	15		4.00833	6
4.01667	16		4.01667	6
4.025	17		4.025	5
4.03333	17		4.03333	5
4.04167	18		4.04167	5
4.05	18		4.05	5
4.05833	18		4.05833	6
4.06667	16		4.06667	6
4.075	16		4.075	7
4.08333	16		4.08333	7
4.09167	17		4.09167	6
4.1	19		4.1	5
4.10833	20		4.10833	5
4.11667	19		4.11667	6
4.125	19		4.125	7
4.13333	18		4.13333	7
4.14167	18		4.14167	7
4.15	18		4.15	6
4.15833	18		4.15833	6
4.16667	18		4.16667	6
4.175	17		4.175	6
4.18333	15		4.18333	7
4.19167	15		4.19167	7
4.2	14		4.2	6
4.20833	15		4.20833	5
4.21667	16		4.21667	5
4.225	17		4.225	5
4.23333	17		4.23333	5
4.24167	17		4.24167	5
4.25	16		4.25	5
4.25833	16		4.25833	4
4.26667	16		4.26667	3
4.275	16		4.275	3
4.28333	17		4.28333	4
4.29167	17		4.29167	4
4.3	16		4.3	5
4.30833	14		4.30833	6
4.31667	14		4.31667	6
4.325	14		4.325	4
4.33333	15		4.33333	3
4.34167	16		4.34167	3
4.35	16		4.35	3
4.35833	15		4.35833	4
4.36667	15		4.36667	5
4.375	15		4.375	5
4.38333	15		4.38333	6
4.39167	16		4.39167	7
4.4	17		4.4	7
4.40833	17		4.40833	7
4.41667	16		4.41667	7
4.425	15		4.425	7
4.43333	14		4.43333	6
4.44167	14		4.44167	5
4.45	15		4.45	4
4.45833	15		4.45833	4
4.46667	16		4.46667	5
4.475	15		4.475	6
4.48333	15		4.48333	7
4.49167	14		4.49167	6
4.5	15		4.5	6
4.50833	16		4.50833	5
4.51667	17		4.51667	5
4.525	18		4.525	5
4.53333	18		4.53333	6
4.54167	17		4.54167	6
4.55	16		4.55	6
4.55833	16		4.55833	7
4.56667	17		4.56667	7
4.575	18		4.575	8
4.58333	19		4.58333	9
4.59167	18		4.59167	10
4.6	17		4.6	11
4.60833	17		4.60833	11
4.61667	18		4.61667	10
4.625	18		4.625	9
4.63333	19		4.63333	8
4.64167	20		4.64167	8
4.65	20		4.65	8
4.65833	20		4.65833	8
4.66667	20		4.66667	8
4.675	20		4.675	8
4.68333	20		4.68333	8
4.69167	20		4.69167	7
4.7	20		4.7	7
4.70833	20		4.70833	7
4.71667	20		4.71667	8
4.725	20		4.725	8
4.73333	21		4.73333	7
4.74167	23		4.74167	6
4.75	24		4.75	6
4.75833	25		4.75833	6
4.76667	24		4.76667	7
4.775	23		4.775	9
4.78333	22		4.78333	9
4.79167	21		4.79167	8
4.8	20		4.8	8
4.80833	20		4.80833	8
4.81667	21		4.81667	8
4.825	21		4.825	9
4.83333	20		4.83333	10
4.84167	20		4.84167	10
4.85	20		4.85	10
4.85833	21		4.85833	9
4.86667	23		4.86667	8
4.875	23		4.875	8
4.88333	23		4.88333	8
4.89167	22		4.89167	8
4.9	22		4.9	9
4.90833	22		4.90833	8
4.91667	23		4.91667	8
4.925	23		4.925	8
4.93333	22		4.93333	7
4.94167	22		4.94167	8
4.95	21		4.95	8
4.95833	19		4.95833	8
4.96667	18		4.96667	8
4.975	19		4.975	7
4.98333	21		4.98333	7
4.99167	23		4.99167	6
5	23		5	7
5.00833	22		5.00833	7
5.01667	22		5.01667	8
5.025	21		5.025	7
5.03333	21		5.03333	6
5.04167	22		5.04167	6
5.05	22		5.05	6
5.05833	22		5.05833	7
5.06667	22		5.06667	8
5.075	21		5.075	8
5.08333	21		5.08333	8
5.09167	21		5.09167	7
5.1	22		5.1	6
5.10833	22		5.10833	6
5.11667	21		5.11667	7
5.125	20		5.125	8
5.13333	19		5.13333	9
5.14167	19		5.14167	10
5.15	19		5.15	9
5.15833	21		5.15833	9
5.16667	21		5.16667	9
5.175	20		5.175	8
5.18333	19		5.18333	8
5.19167	17		5.19167	8
5.2	17		5.2	8
5.20833	17		5.20833	6
5.21667	17		5.21667	6
5.225	18		5.225	6
5.23333	19		5.23333	7
5.24167	19		5.24167	8
5.25	18		5.25	9
5.25833	18		5.25833	10
5.26667	19		5.26667	9
5.275	21		5.275	8
5.28333	23		5.28333	8
5.29167	23		5.29167	7
5.3	22		5.3	8
5.30833	21		5.30833	9
5.31667	20		5.31667	9
5.325	19		5.325	9
5.33333	19		5.33333	10
5.34167	18		5.34167	10
5.35	17		5.35	11
5.35833	17		5.35833	12
5.36667	17		5.36667	12
5.375	17		5.375	12
5.38333	17		5.38333	11
5.39167	18		5.39167	10
5.4	20		5.4	9
5.40833	22		5.40833	9
5.41667	23		5.41667	10
5.425	22		5.425	10
5.43333	22		5.43333	9
5.44167	22		5.44167	8
5.45	23		5.45	7
5.45833	23		5.45833	8
5.46667	22		5.46667	9
5.475	21		5.475	10
5.48333	19		5.48333	10
5.49167	18		5.49167	10
5.5	18		5.5	9
5.50833	20		5.50833	8
5.51667	21		5.51667	8
5.525	21		5.525	9
5.53333	21		5.53333	9
5.54167	20		5.54167	10
5.55	20		5.55	10
5.55833	21		5.55833	9
5.56667	22		5.56667	7
5.575	22		5.575	7
5.58333	22		5.58333	7
5.59167	22		5.59167	8
5.6	21		5.6	9
5.60833	20		5.60833	10
5.61667	19		5.61667	11
5.625	18		5.625	11
5.63333	19		5.63333	12
5.64167	20		5.64167	12
5.65	20		5.65	13
5.65833	21		5.65833	14
5.66667	21		5.66667	14
5.675	21		5.675	14
5.68333	22		5.68333	13
5.69167	22		5.69167	13
5.7	23		5.7	13
5.70833	23		5.70833	14
5.71667	22		5.71667	13
5.725	22		5.725	12
5.73333	22		5.73333	11
5.74167	22		5.74167	9
5.75	23		5.75	9
5.75833	24		5.75833	9
5.76667	24		5.76667	9
5.775	24		5.775	10
5.78333	23		5.78333	10
5.79167	22		5.79167	10
5.8	22		5.8	9
5.80833	22		5.80833	9
5.81667	21		5.81667	9
5.825	20		5.825	9
5.83333	19		5.83333	9
5.84167	18		5.84167	9
5.85	18		5.85	9
5.85833	18		5.85833	8
5.86667	19		5.86667	8
5.875	20		5.875	9
5.88333	20		5.88333	9
5.89167	19		5.89167	10
5.9	18		5.9	11
5.90833	18		5.90833	11
5.91667	18		5.91667	9
5.925	19		5.925	9
5.93333	21		5.93333	9
5.94167	21		5.94167	10
5.95	20		5.95	11
5.95833	20		5.95833	11
5.96667	19		5.96667	11
5.975	19		5.975	10
5.98333	19		5.98333	10
5.99167	20		5.99167	11
6	20		6	12
6.00833	20		6.00833	13
6.01667	20		6.01667	13
6.025	20		6.025	13
6.03333	20		6.03333	12
6.04167	21		6.04167	12
6.05	22		6.05	11
6.05833	23		6.05833	12
6.06667	23		6.06667	12
6.075	23		6.075	13
6.08333	22		6.08333	13
6.09167	22		6.09167	12
6.1	24		6.1	12
6.10833	26		6.10833	11
6.11667	26		6.11667	12
6.125	26		6.125	12
6.13333	26		6.13333	13
6.14167	25		6.14167	14
6.15	25		6.15	14
6.15833	25		6.15833	14
6.16667	24		6.16667	15
6.175	25		6.175	16
6.18333	25		6.18333	17
6.19167	25		6.19167	19
6.2	26		6.2	21
6.20833	26		6.20833	21
6.21667	27		6.21667	22
6.225	27		6.225	23
6.23333	27		6.23333	24
6.24167	28		6.24167	26
6.25	28		6.25	29
6.25833	29		6.25833	31
6.26667	31		6.26667	32
6.275	33		6.275	34
6.28333	35		6.28333	37
6.29167	37		6.29167	41
6.3	37		6.3	44
6.30833	38		6.30833	47
6.31667	40		6.31667	51
6.325	42		6.325	54
6.33333	44		6.33333	58
6.34167	46		6.34167	63
6.35	48		6.35	68
6.35833	50		6.35833	74
6.36667	52		6.36667	80
6.375	54		6.375	86
6.38333	57		6.38333	91
6.39167	60		6.39167	96
6.4	63		6.4	101
6.40833	65		6.40833	108
6.41667	68		6.41667	115
6.425	70		6.425	121
6.43333	73		6.43333	126
6.44167	76		6.44167	132
6.45	81		6.45	138
6.45833	85		6.45833	146
6.46667	89		6.46667	154
6.475	93		6.475	163
6.48333	96		6.48333	173
6.49167	99		6.49167	181
6.5	102		6.5	191
6.50833	106		6.50833	202
6.51667	111		6.51667	215
6.525	115		6.525	229
6.53333	118		6.53333	243
6.54167	122		6.54167	256
6.55	127		6.55	270
6.55833	132		6.55833	284
6.56667	138		6.56667	300
6.575	143		6.575	319
6.58333	149		6.58333	339
6.59167	154		6.59167	360
6.6	158		6.6	382
6.60833	163		6.60833	405
6.61667	168		6.61667	428
6.625	174		6.625	453
6.63333	180		6.63333	479
6.64167	186		6.64167	507
6.65	192		6.65	537
6.65833	198		6.65833	568
6.66667	204		6.66667	599
6.675	210		6.675	630
6.68333	217		6.68333	662
6.69167	224		6.69167	696
6.7	232		6.7	732
6.70833	239		6.70833	770
6.71667	245		6.71667	807
6.725	251		6.725	844
6.73333	257		6.73333	881
6.74167	264		6.74167	919
6.75	271		6.75	958
6.75833	278		6.75833	999
6.76667	284		6.76667	1042
6.775	289		6.775	1085
6.78333	293		6.78333	1127
6.79167	298		6.79167	1171
6.8	303		6.8	1214
6.80833	309		6.80833	1259
6.81667	315		6.81667	1304
6.825	319		6.825	1351
6.83333	322		6.83333	1398
6.84167	324		6.84167	1446
6.85	327		6.85	1493
6.85833	330		6.85833	1540
6.86667	334		6.86667	1587
6.875	338		6.875	1635
6.88333	341		6.88333	1683
6.89167	342		6.89167	1731
6.9	342		6.9	1777
6.90833	342		6.90833	1822
6.91667	342		6.91667	1866
6.925	343		6.925	1909
6.93333	344		6.93333	1952
6.94167	345		6.94167	1995
6.95	345		6.95	2037
6.95833	345		6.95833	2075
6.96667	344		6.96667	2111
6.975	343		6.975	2143
6.98333	342		6.98333	2173
6.99167	341		6.99167	2202
7	339		7	2227
7.00833	337		7.00833	2248
7.01667	334		7.01667	2265
7.025	331		7.025	2279
7.03333	329		7.03333	2287
7.04167	328		7.04167	2291
7.05	327		7.05	2290
7.05833	326		7.05833	2282
7.06667	324		7.06667	2268
7.075	321		7.075	2248
7.08333	318		7.08333	2220
7.09167	315		7.09167	2187
7.1	313		7.1	2146
7.10833	311		7.10833	2099
7.11667	309		7.11667	2046
7.125	306		7.125	1988
7.13333	302		7.13333	1924
7.14167	297		7.14167	1857
7.15	292		7.15	1785
7.15833	288		7.15833	1709
7.16667	284		7.16667	1631
7.175	281		7.175	1552
7.18333	277		7.18333	1473
7.19167	273		7.19167	1396
7.2	269		7.2	1321
7.20833	267		7.20833	1248
7.21667	265		7.21667	1177
7.225	264		7.225	1109
7.23333	263		7.23333	1045
7.24167	261		7.24167	985
7.25	259		7.25	930
7.25833	257		7.25833	880
7.26667	255		7.26667	834
7.275	254		7.275	792
7.28333	254		7.28333	754
7.29167	254		7.29167	720
7.3	255		7.3	690
7.30833	256		7.30833	664
7.31667	257		7.31667	640
7.325	258		7.325	620
7.33333	259		7.33333	601
7.34167	261		7.34167	584
7.35	264		7.35	569
7.35833	267		7.35833	556
7.36667	269		7.36667	546
7.375	271		7.375	538
7.38333	274		7.38333	530
7.39167	278		7.39167	522
7.4	283		7.4	517
7.40833	288		7.40833	512
7.41667	293		7.41667	509
7.425	298		7.425	506
7.43333	303		7.43333	504
7.44167	308		7.44167	502
7.45	315		7.45	500
7.45833	322		7.45833	499
7.46667	330		7.46667	499
7.475	339		7.475	500
7.48333	347		7.48333	500
7.49167	355		7.49167	501
7.5	364		7.5	502
7.50833	373		7.50833	503
7.51667	382		7.51667	504
7.525	392		7.525	506
7.53333	401		7.53333	508
7.54167	409		7.54167	510
7.55	418		7.55	513
7.55833	426		7.55833	515
7.56667	434		7.56667	517
7.575	443		7.575	518
7.58333	453		7.58333	520
7.59167	463		7.59167	523
7.6	472		7.6	526
7.60833	481		7.60833	528
7.61667	490		7.61667	529
7.625	499		7.625	529
7.63333	509		7.63333	530
7.64167	519		7.64167	531
7.65	528		7.65	533
7.65833	536		7.65833	533
7.66667	544		7.66667	535
7.675	553		7.675	535
7.68333	561		7.68333	536
7.69167	569		7.69167	536
7.7	578		7.7	537
7.70833	586		7.70833	537
7.71667	593		7.71667	538
7.725	600		7.725	538
7.73333	607		7.73333	537
7.74167	614		7.74167	535
7.75	623		7.75	533
7.75833	631		7.75833	531
7.76667	639		7.76667	530
7.775	646		7.775	528
7.78333	652		7.78333	527
7.79167	658		7.79167	525
7.8	665		7.8	522
7.80833	672		7.80833	519
7.81667	678		7.81667	515
7.825	684		7.825	511
7.83333	689		7.83333	507
7.84167	693		7.84167	503
7.85	698		7.85	499
7.85833	702		7.85833	493
7.86667	708		7.86667	487
7.875	713		7.875	481
7.88333	719		7.88333	476
7.89167	724		7.89167	471
7.9	729		7.9	466
7.90833	733		7.90833	461
7.91667	737		7.91667	455
7.925	743		7.925	448
7.93333	748		7.93333	441
7.94167	754		7.94167	434
7.95	759		7.95	427
7.95833	762		7.95833	419
7.96667	765		7.96667	412
7.975	769		7.975	405
7.98333	773		7.98333	398
7.99167	778		7.99167	391
8	783		8	384
8.00833	788		8.00833	378
8.01667	792		8.01667	372
8.025	796		8.025	365
8.03333	800		8.03333	357
8.04167	804		8.04167	349
8.05	809		8.05	342
8.05833	813		8.05833	335
8.06667	817		8.06667	329
8.075	821		8.075	323
8.08333	824		8.08333	317
8.09167	827		8.09167	310
8.1	831		8.1	302
8.10833	835		8.10833	295
8.11667	839		8.11667	289
8.125	844		8.125	284
8.13333	848		8.13333	279
8.14167	852		8.14167	275
8.15	856		8.15	269
8.15833	860		8.15833	263
8.16667	864		8.16667	258
8.175	869		8.175	254
8.18333	873		8.18333	251
8.19167	877		8.19167	249
8.2	882		8.2	246
8.20833	887		8.20833	243
8.21667	892		8.21667	241
8.225	897		8.225	239
8.23333	903		8.23333	237
8.24167	910		8.24167	236
8.25	915		8.25	235
8.25833	920		8.25833	233
8.26667	925		8.26667	230
8.275	930		8.275	226
8.28333	937		8.28333	222
8.29167	942		8.29167	219
8.3	949		8.3	216
8.30833	955		8.30833	211
8.31667	960		8.31667	206
8.325	966		8.325	201
8.33333	972		8.33333	195
8.34167	978		8.34167	189
8.35	984		8.35	184
8.35833	990		8.35833	179
8.36667	995		8.36667	175
8.375	1000		8.375	170
8.38333	1006		8.38333	165
8.39167	1012		8.39167	159
8.4	1019		8.4	154
8.40833	1027		8.40833	149
8.41667	1034		8.41667	145
8.425	1041		8.425	140
8.43333	1047		8.43333	136
8.44167	1054		8.44167	132
8.45	1060		8.45	128
8.45833	1066		8.45833	123
8.46667	1073		8.46667	119
8.475	1079		8.475	116
8.48333	1084		8.48333	113
8.49167	1090		8.49167	110
8.5	1095		8.5	108
8.50833	1101		8.50833	106
8.51667	1107		8.51667	103
8.525	1113		8.525	102
8.53333	1119		8.53333	100
8.54167	1123		8.54167	100
8.55	1126		8.55	100
8.55833	1128		8.55833	101
8.56667	1130		8.56667	100
8.575	1131		8.575	100
8.58333	1131		8.58333	99
8.59167	1130		8.59167	100
8.6	1127		8.6	101
8.60833	1122		8.60833	101
8.61667	1116		8.61667	101
8.625	1108		8.625	102
8.63333	1100		8.63333	102
8.64167	1089		8.64167	103
8.65	1076		8.65	104
8.65833	1061		8.65833	105
8.66667	1043		8.66667	107
8.675	1025		8.675	107
8.68333	1007		8.68333	108
8.69167	989		8.69167	109
8.7	971		8.7	111
8.70833	953		8.70833	113
8.71667	932		8.71667	115
8.725	908		8.725	116
8.73333	881		8.73333	116
8.74167	851		8.74167	117
8.75	819		8.75	118
8.75833	784		8.75833	121
8.76667	747		8.76667	125
8.775	708		8.775	129
8.78333	669		8.78333	132
8.79167	632		8.79167	135
8.8	597		8.8	137
8.80833	564		8.80833	138
8.81667	534		8.81667	140
8.825	507		8.825	141
8.83333	482		8.83333	144
8.84167	459		8.84167	147
8.85	438		8.85	150
8.85833	420		8.85833	153
8.86667	405		8.86667	155
8.875	392		8.875	158
8.88333	380		8.88333	160
8.89167	371		8.89167	163
8.9	364		8.9	166
8.90833	357		8.90833	169
8.91667	353		8.91667	172
8.925	350		8.925	175
8.93333	348		8.93333	177
8.94167	348		8.94167	178
8.95	347		8.95	181
8.95833	346		8.95833	183
8.96667	344		8.96667	184
8.975	343		8.975	185
8.98333	343		8.98333	185
8.99167	345		8.99167	184
9	346		9	184
9.00833	346		9.00833	184
9.01667	346		9.01667	184
9.025	347		9.025	182
9.03333	348		9.03333	179
9.04167	350		9.04167	175
9.05	352		9.05	169
9.05833	353		9.05833	163
9.06667	355		9.06667	156
9.075	356		9.075	148
9.08333	357		9.08333	140
9.09167	358		9.09167	131
9.1	360		9.1	123
9.10833	363		9.10833	116
9.11667	365		9.11667	109
9.125	366		9.125	103
9.13333	368		9.13333	98
9.14167	370		9.14167	93
9.15	371		9.15	89
9.15833	373		9.15833	84
9.16667	377		9.16667	79
9.175	380		9.175	75
9.18333	384		9.18333	71
9.19167	387		9.19167	69
9.2	390		9.2	68
9.20833	393		9.20833	66
9.21667	397		9.21667	64
9.225	402		9.225	63
9.23333	407		9.23333	62
9.24167	412		9.24167	62
9.25	416		9.25	62
9.25833	419		9.25833	61
9.26667	421		9.26667	60
9.275	421		9.275	58
9.28333	420		9.28333	57
9.29167	417		9.29167	55
9.3	411		9.3	53
9.30833	403		9.30833	53
9.31667	393		9.31667	53
9.325	381		9.325	53
9.33333	370		9.33333	52
9.34167	359		9.34167	51
9.35	349		9.35	50
9.35833	339		9.35833	50
9.36667	331		9.36667	49
9.375	323		9.375	49
9.38333	316		9.38333	49
9.39167	310		9.39167	49
9.4	305		9.4	48
9.40833	302		9.40833	47
9.41667	298		9.41667	46
9.425	295		9.425	46
9.43333	292		9.43333	46
9.44167	289		9.44167	46
9.45	287		9.45	45
9.45833	284		9.45833	44
9.46667	281		9.46667	44
9.475	278		9.475	44
9.48333	273		9.48333	44
9.49167	267		9.49167	46
9.5	262		9.5	48
9.50833	258		9.50833	49
9.51667	255		9.51667	50
9.525	252		9.525	50
9.53333	249		9.53333	50
9.54167	246		9.54167	52
9.55	243		9.55	53
9.55833	240		9.55833	54
9.56667	238		9.56667	53
9.575	235		9.575	52
9.58333	234		9.58333	52
9.59167	232		9.59167	52
9.6	230		9.6	54
9.60833	227		9.60833	55
9.61667	224		9.61667	56
9.625	221		9.625	56
9.63333	218		9.63333	56
9.64167	216		9.64167	57
9.65	213		9.65	59
9.65833	212		9.65833	62
9.66667	211		9.66667	65
9.675	210		9.675	66
9.68333	209		9.68333	66
9.69167	208		9.69167	66
9.7	206		9.7	67
9.70833	205		9.70833	68
9.71667	203		9.71667	71
9.725	201		9.725	73
9.73333	199		9.73333	75
9.74167	196		9.74167	77
9.75	194		9.75	79
9.75833	191		9.75833	80
9.76667	189		9.76667	82
9.775	187		9.775	83
9.78333	184		9.78333	85
9.79167	181		9.79167	87
9.8	178		9.8	87
9.80833	176		9.80833	88
9.81667	175		9.81667	88
9.825	175		9.825	89
9.83333	173		9.83333	90
9.84167	171		9.84167	91
9.85	170		9.85	92
9.85833	169		9.85833	94
9.86667	167		9.86667	94
9.875	167		9.875	94
9.88333	167		9.88333	94
9.89167	166		9.89167	94
9.9	165		9.9	95
9.90833	163		9.90833	96
9.91667	162		9.91667	95
9.925	161		9.925	95
9.93333	160		9.93333	95
9.94167	160		9.94167	94
9.95	160		9.95	94
9.95833	159		9.95833	93
9.96667	156		9.96667	92
9.975	154		9.975	91
9.98333	152		9.98333	90
9.99167	151		9.99167	88
10	151		10	87
10.0083	151		10.0083	86
10.0167	150		10.0167	85
10.025	149		10.025	84
10.0333	148		10.0333	83
10.0417	147		10.0417	80
10.05	146		10.05	78
10.0583	146		10.0583	76
10.0667	145		10.0667	74
10.075	144		10.075	72
10.0833	143		10.0833	70
10.0917	141		10.0917	68
10.1	140		10.1	65
10.1083	139		10.1083	62
10.1167	138		10.1167	60
10.125	138		10.125	58
10.1333	136		10.1333	56
10.1417	135		10.1417	55
10.15	134		10.15	53
10.1583	133		10.1583	50
10.1667	133		10.1667	47
10.175	133		10.175	45
10.1833	132		10.1833	44
10.1917	131		10.1917	43
10.2	129		10.2	43
10.2083	127		10.2083	42
10.2167	126		10.2167	40
10.225	126		10.225	38
10.2333	126		10.2333	36
10.2417	125		10.2417	34
10.25	125		10.25	33
10.2583	124		10.2583	31
10.2667	124		10.2667	29
10.275	124		10.275	27
10.2833	125		10.2833	25
10.2917	126		10.2917	23
10.3	126		10.3	23
10.3083	126		10.3083	24
10.3167	125		10.3167	24
10.325	125		10.325	25
10.3333	124		10.3333	25
10.3417	124		10.3417	25
10.35	124		10.35	24
10.3583	125		10.3583	24
10.3667	125		10.3667	25
10.375	125		10.375	26
10.3833	125		10.3833	25
10.3917	125		10.3917	25
10.4	126		10.4	24
10.4083	126		10.4083	24
10.4167	127		10.4167	24
10.425	127		10.425	24
10.4333	127		10.4333	25
10.4417	128		10.4417	25
10.45	128		10.45	25
10.4583	130		10.4583	24
10.4667	132		10.4667	24
10.475	133		10.475	24
10.4833	133		10.4833	24
10.4917	133		10.4917	23
10.5	133		10.5	23
10.5083	134		10.5083	23
10.5167	135		10.5167	23
10.525	136		10.525	24
10.5333	137		10.5333	24
10.5417	138		10.5417	25
10.55	139		10.55	26
10.5583	139		10.5583	27
10.5667	139		10.5667	27
10.575	140		10.575	26
10.5833	141		10.5833	25
10.5917	143		10.5917	26
10.6	144		10.6	27
10.6083	145		10.6083	29
10.6167	145		10.6167	30
10.625	146		10.625	31
10.6333	147		10.6333	32
10.6417	149		10.6417	33
10.65	151		10.65	34
10.6583	153		10.6583	36
10.6667	154		10.6667	38
10.675	155		10.675	39
10.6833	156		10.6833	40
10.6917	158		10.6917	41
10.7	160		10.7	42
10.7083	162		10.7083	43
10.7167	164		10.7167	45
10.725	166		10.725	45
10.7333	168		10.7333	47
10.7417	169		10.7417	48
10.75	170		10.75	48
10.7583	172		10.7583	49
10.7667	173		10.7667	51
10.775	175		10.775	53
10.7833	176		10.7833	55
10.7917	177		10.7917	58
10.8	179		10.8	59
10.8083	182		10.8083	61
10.8167	184		10.8167	61
10.825	186		10.825	63
10.8333	188		10.8333	65
10.8417	191		10.8417	68
10.85	193		10.85	70
10.8583	194		10.8583	72
10.8667	196		10.8667	74
10.875	200		10.875	75
10.8833	203		10.8833	76
10.8917	206		10.8917	78
10.9	209		10.9	80
10.9083	210		10.9083	83
10.9167	212		10.9167	84
10.925	215		10.925	86
10.9333	218		10.9333	86
10.9417	220		10.9417	88
10.95	222		10.95	90
10.9583	224		10.9583	92
10.9667	226		10.9667	96
10.975	228		10.975	99
10.9833	230		10.9833	102
10.9917	232		10.9917	104
11	236		11	106
11.0083	239		11.0083	108
11.0167	242		11.0167	110
11.025	244		11.025	112
11.0333	246		11.0333	114
11.0417	248		11.0417	115
11.05	250		11.05	116
11.0583	253		11.0583	118
11.0667	256		11.0667	120
11.075	259		11.075	123
11.0833	262		11.0833	125
11.0917	264		11.0917	128
11.1	267		11.1	130
11.1083	270		11.1083	130
11.1167	274		11.1167	131
11.125	277		11.125	133
11.1333	280		11.1333	137
11.1417	282		11.1417	140
11.15	285		11.15	142
11.1583	287		11.1583	144
11.1667	290		11.1667	145
11.175	292		11.175	147
11.1833	295		11.1833	149
11.1917	297		11.1917	150
11.2	300		11.2	152
11.2083	302		11.2083	153
11.2167	305		11.2167	153
11.225	308		11.225	154
11.2333	313		11.2333	156
11.2417	317		11.2417	158
11.25	321		11.25	159
11.2583	324		11.2583	160
11.2667	327		11.2667	160
11.275	330		11.275	159
11.2833	333		11.2833	157
11.2917	336		11.2917	157
11.3	340		11.3	156
11.3083	343		11.3083	154
11.3167	347		11.3167	152
11.325	351		11.325	149
11.3333	354		11.3333	146
11.3417	357		11.3417	142
11.35	359		11.35	139
11.3583	361		11.3583	136
11.3667	364		11.3667	133
11.375	366		11.375	129
11.3833	369		11.3833	123
11.3917	372		11.3917	117
11.4	375		11.4	111
11.4083	379		11.4083	106
11.4167	382		11.4167	102
11.425	385		11.425	98
11.4333	387		11.4333	94
11.4417	388		11.4417	89
11.45	388		11.45	84
11.4583	388		11.4583	79
11.4667	388		11.4667	74
11.475	388		11.475	70
11.4833	387		11.4833	66
11.4917	383		11.4917	63
11.5	378		11.5	60
11.5083	371		11.5083	57
11.5167	362		11.5167	53
11.525	351		11.525	49
11.5333	340		11.5333	46
11.5417	328		11.5417	43
11.55	316		11.55	40
11.5583	302		11.5583	39
11.5667	286		11.5667	37
11.575	271		11.575	34
11.5833	255		11.5833	32
11.5917	238		11.5917	30
11.6	223		11.6	29
11.6083	209		11.6083	29
11.6167	196		11.6167	28
11.625	183		11.625	27
11.6333	171		11.6333	25
11.6417	162		11.6417	23
11.65	154		11.65	22
11.6583	147		11.6583	22
11.6667	141		11.6667	22
11.675	135		11.675	22
11.6833	130		11.6833	22
11.6917	126		11.6917	20
11.7	122		11.7	18
11.7083	119		11.7083	17
11.7167	116		11.7167	17
11.725	113		11.725	17
11.7333	109		11.7333	17
11.7417	107		11.7417	17
11.75	105		11.75	16
11.7583	104		11.7583	15
11.7667	103		11.7667	14
11.775	102		11.775	14
11.7833	101		11.7833	13
11.7917	98		11.7917	13
11.8	96		11.8	13
11.8083	94		11.8083	12
11.8167	91		11.8167	12
11.825	90		11.825	12
11.8333	90		11.8333	12
11.8417	89		11.8417	13
11.85	89		11.85	13
11.8583	88		11.8583	13
11.8667	88		11.8667	12
11.875	88		11.875	10
11.8833	88		11.8833	9
11.8917	88		11.8917	9
11.9	88		11.9	9
11.9083	88		11.9083	10
11.9167	87		11.9167	11
11.925	85		11.925	12
11.9333	85		11.9333	12
11.9417	85		11.9417	11
11.95	85		11.95	11
11.9583	85		11.9583	11
11.9667	85		11.9667	10
11.975	84		11.975	9
11.9833	84		11.9833	9
11.9917	83		11.9917	8
12	83		12	8
12.0083	83		12.0083	8
12.0167	84		12.0167	9
12.025	84		12.025	9
12.0333	82		12.0333	9
12.0417	81		12.0417	8
12.05	81		12.05	7
12.0583	82		12.0583	7
12.0667	82		12.0667	7
12.075	81		12.075	7
12.0833	80		12.0833	7
12.0917	79		12.0917	6
12.1	79		12.1	4
12.1083	78		12.1083	3
12.1167	78		12.1167	2
12.125	78		12.125	3
12.1333	77		12.1333	5
12.1417	76		12.1417	7
12.15	75		12.15	8
12.1583	74		12.1583	9
12.1667	75		12.1667	8
12.175	76		12.175	7
12.1833	77		12.1833	7
12.1917	77		12.1917	7
12.2	77		12.2	8
12.2083	76		12.2083	8
12.2167	76		12.2167	8
12.225	76		12.225	8
12.2333	76		12.2333	8
12.2417	77		12.2417	9
12.25	77		12.25	9
12.2583	78		12.2583	10
12.2667	77		12.2667	10
12.275	75		12.275	10
12.2833	74		12.2833	9
12.2917	73		12.2917	8
12.3	73		12.3	8
12.3083	73		12.3083	8
12.3167	73		12.3167	9
12.325	72		12.325	10
12.3333	71		12.3333	10
12.3417	70		12.3417	10
12.35	69		12.35	9
12.3583	69		12.3583	10
12.3667	69		12.3667	11
12.375	68		12.375	12
12.3833	67		12.3833	13
12.3917	66		12.3917	13
12.4	66		12.4	13
12.4083	67		12.4083	12
12.4167	69		12.4167	12
12.425	70		12.425	12
12.4333	71		12.4333	12
12.4417	70		12.4417	13
12.45	70		12.45	14
12.4583	70		12.4583	14
12.4667	70		12.4667	14
12.475	70		12.475	15
12.4833	70		12.4833	16
12.4917	71		12.4917	16
12.5	71		12.5	17
12.5083	71		12.5083	17
12.5167	71		12.5167	17
12.525	71		12.525	17
12.5333	72		12.5333	18
12.5417	73		12.5417	18
12.55	72		12.55	20
12.5583	71		12.5583	21
12.5667	70		12.5667	21
12.575	70		12.575	20
12.5833	70		12.5833	19
12.5917	70		12.5917	18
12.6	71		12.6	17
12.6083	72		12.6083	18
12.6167	72		12.6167	18
12.625	71		12.625	18
12.6333	71		12.6333	18
12.6417	70		12.6417	18
12.65	71		12.65	18
12.6583	71		12.6583	19
12.6667	71		12.6667	20
12.675	70		12.675	22
12.6833	68		12.6833	23
12.6917	67		12.6917	22
12.7	67		12.7	22
12.7083	67		12.7083	22
12.7167	69		12.7167	23
12.725	70		12.725	24
12.7333	70		12.7333	24
12.7417	69		12.7417	24
12.75	68		12.75	25
12.7583	68		12.7583	25
12.7667	68		12.7667	25
12.775	68		12.775	26
12.7833	69		12.7833	27
12.7917	69		12.7917	29
12.8	68		12.8	31
12.8083	68		12.8083	32
12.8167	68		12.8167	32
12.825	69		12.825	32
12.8333	70		12.8333	33
12.8417	72		12.8417	33
12.85	72		12.85	34
12.8583	71		12.8583	36
12.8667	70		12.8667	37
12.875	69		12.875	37
12.8833	68		12.8833	37
12.8917	68		12.8917	36
12.9	68		12.9	37
12.9083	69		12.9083	38
12.9167	69		12.9167	38
12.925	70		12.925	39
12.9333	72		12.9333	39
12.9417	73		12.9417	39
12.95	74		12.95	41
12.9583	74		12.9583	43
12.9667	74		12.9667	45
12.975	73		12.975	47
12.9833	72		12.9833	49
12.9917	71		12.9917	49
13	71		13	49
13.0083	72		13.0083	50
13.0167	72		13.0167	50
13.025	72		13.025	51
13.0333	71		13.0333	51
13.0417	70		13.0417	51
13.05	69		13.05	51
13.0583	70		13.0583	52
13.0667	70		13.0667	53
13.075	70		13.075	54
13.0833	70		13.0833	56
13.0917	69		13.0917	57
13.1	68		13.1	58
13.1083	68		13.1083	58
13.1167	67		13.1167	58
13.125	67		13.125	59
13.1333	68		13.1333	59
13.1417	67		13.1417	59
13.15	66		13.15	59
13.1583	65		13.1583	60
13.1667	65		13.1667	60
13.175	65		13.175	61
13.1833	65		13.1833	62
13.1917	65		13.1917	63
13.2	64		13.2	64
13.2083	63		13.2083	65
13.2167	62		13.2167	65
13.225	61		13.225	65
13.2333	60		13.2333	65
13.2417	61		13.2417	66
13.25	62		13.25	67
13.2583	63		13.2583	69
13.2667	63		13.2667	70
13.275	62		13.275	70
13.2833	61		13.2833	70
13.2917	60		13.2917	70
13.3	60		13.3	71
13.3083	60		13.3083	72
13.3167	59		13.3167	73
13.325	58		13.325	74
13.3333	56		13.3333	76
13.3417	55		13.3417	76
13.35	55		13.35	74
13.3583	55		13.3583	73
13.3667	56		13.3667	73
13.375	56		13.375	74
13.3833	55		13.3833	75
13.3917	53		13.3917	75
13.4	52		13.4	74
13.4083	52		13.4083	72
13.4167	51		13.4167	71
13.425	51		13.425	70
13.4333	51		13.4333	70
13.4417	50		13.4417	70
13.45	49		13.45	71
13.4583	49		13.4583	71
13.4667	49		13.4667	71
13.475	49		13.475	71
13.4833	49		13.4833	71
13.4917	48		13.4917	71
13.5	47		13.5	70
13.5083	46		13.5083	70
13.5167	45		13.5167	70
13.525	44		13.525	69
13.5333	43		13.5333	68
13.5417	44		13.5417	68
13.55	44		13.55	67
13.5583	44		13.5583	66
13.5667	42		13.5667	65
13.575	41		13.575	65
13.5833	40		13.5833	63
13.5917	40		13.5917	62
13.6	40		13.6	62
13.6083	39		13.6083	61
13.6167	39		13.6167	61
13.625	38		13.625	61
13.6333	38		13.6333	60
13.6417	39		13.6417	58
13.65	40		13.65	56
13.6583	40		13.6583	54
13.6667	39		13.6667	53
13.675	38		13.675	53
13.6833	37		13.6833	52
13.6917	36		13.6917	50
13.7	36		13.7	48
13.7083	36		13.7083	47
13.7167	37		13.7167	47
13.725	38		13.725	47
13.7333	38		13.7333	47
13.7417	38		13.7417	47
13.75	37		13.75	47
13.7583	37		13.7583	46
13.7667	37		13.7667	46
13.775	38		13.775	45
13.7833	40		13.7833	45
13.7917	41		13.7917	45
13.8	41		13.8	46
13.8083	41		13.8083	46
13.8167	43		13.8167	44
13.825	45		13.825	44
13.8333	46		13.8333	44
13.8417	47		13.8417	44
13.85	46		13.85	43
13.8583	46		13.8583	43
13.8667	45		13.8667	42
13.875	45		13.875	41
13.8833	46		13.8833	39
13.8917	46		13.8917	38
13.9	47		13.9	38
13.9083	48		13.9083	38
13.9167	48		13.9167	38
13.925	47		13.925	38
13.9333	47		13.9333	37
13.9417	48		13.9417	36
13.95	49		13.95	35
13.9583	51		13.9583	35
13.9667	52		13.9667	35
13.975	52		13.975	35
13.9833	52		13.9833	34
13.9917	52		13.9917	33
14	52		14	32
14.0083	53		14.0083	31
14.0167	55		14.0167	31
14.025	56		14.025	32
14.0333	56		14.0333	32
14.0417	56		14.0417	31
14.05	56		14.05	30
14.0583	57		14.0583	28
14.0667	58		14.0667	28
14.075	59		14.075	28
14.0833	60		14.0833	29
14.0917	59		14.0917	30
14.1	58		14.1	30
14.1083	59		14.1083	29
14.1167	60		14.1167	28
14.125	62		14.125	28
14.1333	64		14.1333	28
14.1417	66		14.1417	30
14.15	68		14.15	32
14.1583	68		14.1583	34
14.1667	68		14.1667	34
14.175	70		14.175	32
14.1833	72		14.1833	32
14.1917	74		14.1917	32
14.2	77		14.2	32
14.2083	78		14.2083	32
14.2167	80		14.2167	31
14.225	82		14.225	31
14.2333	85		14.2333	30
14.2417	87		14.2417	29
14.25	89		14.25	29
14.2583	91		14.2583	30
14.2667	93		14.2667	32
14.275	94		14.275	33
14.2833	95		14.2833	34
14.2917	95		14.2917	34
14.3	95		14.3	35
14.3083	96		14.3083	34
14.3167	97		14.3167	34
14.325	98		14.325	34
14.3333	98		14.3333	35
14.3417	98		14.3417	34
14.35	98		14.35	34
14.3583	98		14.3583	34
14.3667	98		14.3667	35
14.375	97		14.375	36
14.3833	95		14.3833	36
14.3917	94		14.3917	37
14.4	92		14.4	37
14.4083	91		14.4083	37
14.4167	90		14.4167	37
14.425	89		14.425	37
14.4333	88		14.4333	37
14.4417	85		14.4417	38
14.45	82		14.45	38
14.4583	78		14.4583	38
14.4667	75		14.4667	38
14.475	72		14.475	38
14.4833	70		14.4833	38
14.4917	67		14.4917	38
14.5	64		14.5	39
14.5083	60		14.5083	39
14.5167	56		14.5167	39
14.525	52		14.525	38
14.5333	49		14.5333	37
14.5417	45		14.5417	36
14.55	42		14.55	35
14.5583	39		14.5583	35
14.5667	36		14.5667	35
14.575	33		14.575	35
14.5833	30		14.5833	34
14.5917	27		14.5917	34
14.6	24		14.6	33
14.6083	21		14.6083	33
14.6167	18		14.6167	32
14.625	15		14.625	31
14.6333	13		14.6333	29
14.6417	11		14.6417	26
14.65	8		14.65	24
14.6583	6		14.6583	23
14.6667	3		14.6667	22
14.675	0		14.675	21
14.6833	-3		14.6833	20
14.6917	-6		14.6917	19
14.7	-8		14.7	18
14.7083	-10		14.7083	17
14.7167	-10		14.7167	14
14.725	-11		14.725	12
14.7333	-12		14.7333	10
14.7417	-15		14.7417	9
14.75	-18		14.75	7
14.7583	-20		14.7583	5
14.7667	-22		14.7667	2
14.775	-23		14.775	-1
14.7833	-23		14.7833	-4
14.7917	-24		14.7917	-6
14.8	-25		14.8	-7
14.8083	-27		14.8083	-8
14.8167	-29		14.8167	-9
14.825	-30		14.825	-11
14.8333	-31		14.8333	-13
14.8417	-32		14.8417	-15
14.85	-32		14.85	-17
14.8583	-34		14.8583	-17
14.8667	-36		14.8667	-18
14.875	-38		14.875	-20
14.8833	-38		14.8833	-22
14.8917	-38		14.8917	-22
14.9	-38		14.9	-21
14.9083	-38		14.9083	-20
14.9167	-39		14.9167	-19
14.925	-39		14.925	-19
14.9333	-38		14.9333	-20
14.9417	-37		14.9417	-21
14.95	-36		14.95	-21
14.9583	-35		14.9583	-20
14.9667	-35		14.9667	-18
14.975	-35		14.975	-17
14.9833	-36		14.9833	-16
14.9917	-35		14.9917	-16
15	-34		15	-16
15.0083	-32		15.0083	-16
15.0167	-30		15.0167	-16
15.025	-28		15.025	-16
15.0333	-27		15.0333	-15
15.0417	-27		15.0417	-15
15.05	-28		15.05	-15
15.0583	-27		15.0583	-15
15.0667	-25		15.0667	-15
15.075	-23		15.075	-14
15.0833	-22		15.0833	-13
15.0917	-22		15.0917	-12
15.1	-22		15.1	-11
15.1083	-22		15.1083	-10
15.1167	-22		15.1167	-10
15.125	-21		15.125	-11
15.1333	-20		15.1333	-10
15.1417	-19		15.1417	-8
15.15	-19		15.15	-7
15.1583	-19		15.1583	-6
15.1667	-19		15.1667	-5
15.175	-19		15.175	-5
15.1833	-18		15.1833	-4
15.1917	-18		15.1917	-5
15.2	-17		15.2	-5
15.2083	-17		15.2083	-4
15.2167	-18		15.2167	-3
15.225	-18		15.225	-3
15.2333	-18		15.2333	-3
15.2417	-18		15.2417	-3
15.25	-17		15.25	-3
15.2583	-17		15.2583	-4
15.2667	-17		15.2667	-3
15.275	-18		15.275	-2
15.2833	-19		15.2833	-2
15.2917	-20		15.2917	-3
15.3	-19		15.3	-3
15.3083	-19		15.3083	-3
15.3167	-19		15.3167	-2
15.325	-20		15.325	-1
15.3333	-22		15.3333	0
15.3417	-24		15.3417	0
15.35	-25		15.35	0
15.3583	-25		15.3583	-1
15.3667	-25		15.3667	-1
15.375	-24		15.375	-1
15.3833	-24		15.3833	0
15.3917	-24		15.3917	2
15.4	-25		15.4	2
15.4083	-26		15.4083	1
15.4167	-25		15.4167	0
15.425	-24		15.425	-1
15.4333	-22		15.4333	-2
15.4417	-22		15.4417	-1
15.45	-21		15.45	-1
15.4583	-21		15.4583	0
15.4667	-21		15.4667	0
15.475	-21		15.475	0
15.4833	-20		15.4833	0
15.4917	-20		15.4917	0
15.5	-20		15.5	1
15.5083	-21		15.5083	2
15.5167	-22		15.5167	2
15.525	-23		15.525	2
15.5333	-23		15.5333	2
15.5417	-23		15.5417	3
15.55	-22		15.55	3
15.5583	-21		15.5583	3
15.5667	-22		15.5667	3
15.575	-22		15.575	2
15.5833	-24		15.5833	1
15.5917	-25		15.5917	0
15.6	-25		15.6	0
15.6083	-24		15.6083	0
15.6167	-24		15.6167	1
15.625	-24		15.625	2
15.6333	-24		15.6333	3
15.6417	-24		15.6417	3
15.65	-24		15.65	2
15.6583	-23		15.6583	1
15.6667	-24		15.6667	1
15.675	-23		15.675	3
15.6833	-23		15.6833	4
15.6917	-24		15.6917	6
15.7	-26		15.7	6
15.7083	-26		15.7083	6
15.7167	-26		15.7167	5
15.725	-27		15.725	5
15.7333	-27		15.7333	4
15.7417	-28		15.7417	5
15.75	-29		15.75	6
15.7583	-29		15.7583	6
15.7667	-29		15.7667	6
15.775	-28		15.775	5
15.7833	-28		15.7833	6
15.7917	-28		15.7917	6
15.8	-29		15.8	8
15.8083	-30		15.8083	9
15.8167	-30		15.8167	9
15.825	-30		15.825	9
15.8333	-29		15.8333	9
15.8417	-28		15.8417	11
15.85	-27		15.85	12
15.8583	-27		15.8583	14
15.8667	-28		15.8667	15
15.875	-29		15.875	16
15.8833	-29		15.8833	16
15.8917	-28		15.8917	17
15.9	-28		15.9	17
15.9083	-27		15.9083	18
15.9167	-28		15.9167	20
15.925	-29		15.925	21
15.9333	-29		15.9333	23
15.9417	-29		15.9417	23
15.95	-28		15.95	24
15.9583	-27		15.9583	25
15.9667	-27		15.9667	26
15.975	-26		15.975	27
15.9833	-26		15.9833	28
15.9917	-27		15.9917	28
16	-27		16	29
16.0083	-27		16.0083	29
16.0167	-26		16.0167	29
16.025	-24		16.025	30
16.0333	-23		16.0333	31
16.0417	-23		16.0417	31
16.05	-22		16.05	31
16.0583	-22		16.0583	30
16.0667	-22		16.0667	29
16.075	-22		16.075	28
16.0833	-21		16.0833	28
16.0917	-19		16.0917	30
16.1	-18		16.1	30
16.1083	-17		16.1083	30
16.1167	-16		16.1167	30
16.125	-14		16.125	30
16.1333	-13		16.1333	29
16.1417	-12		16.1417	30
16.15	-12		16.15	31
16.1583	-12		16.1583	33
16.1667	-13		16.1667	33
16.175	-14		16.175	32
16.1833	-13		16.1833	31
16.1917	-12		16.1917	31
16.2	-12		16.2	31
16.2083	-11		16.2083	31
16.2167	-10		16.2167	31
16.225	-11		16.225	31
16.2333	-11		16.2333	30
16.2417	-11		16.2417	28
16.25	-10		16.25	26
16.2583	-9		16.2583	25
16.2667	-9		16.2667	26
16.275	-10		16.275	26
16.2833	-10		16.2833	26
16.2917	-10		16.2917	25
16.3	-10		16.3	24
16.3083	-9		16.3083	23
16.3167	-9		16.3167	23
16.325	-9		16.325	24
16.3333	-10		16.3333	24
16.3417	-11		16.3417	24
16.35	-12		16.35	23
16.3583	-12		16.3583	23
16.3667	-11		16.3667	23
16.375	-11		16.375	23
16.3833	-13		16.3833	24
16.3917	-15		16.3917	24
16.4	-18		16.4	25
16.4083	-20		16.4083	24
16.4167	-20		16.4167	23
16.425	-19		16.425	23
16.4333	-18		16.4333	23
16.4417	-17		16.4417	23
16.45	-17		16.45	24
16.4583	-17		16.4583	24
16.4667	-17		16.4667	24
16.475	-17		16.475	23
16.4833	-18		16.4833	22
16.4917	-18		16.4917	21
16.5	-18		16.5	22
16.5083	-19		16.5083	22
16.5167	-20		16.5167	23
16.525	-21		16.525	23
16.5333	-21		16.5333	22
16.5417	-20		16.5417	21
16.55	-19		16.55	21
16.5583	-18		16.5583	21
16.5667	-19		16.5667	21
16.575	-20		16.575	21
16.5833	-21		16.5833	20
16.5917	-21		16.5917	19
16.6	-21		16.6	17
16.6083	-20		16.6083	16
16.6167	-19		16.6167	16
16.625	-19		16.625	18
16.6333	-19		16.6333	19
16.6417	-19		16.6417	19
16.65	-19		16.65	18
16.6583	-19		16.6583	18
16.6667	-18		16.6667	18
[truncated: 400 more rows]

## Sheet: Monosaccharide composition
Monosaccharide standards			UFSDF			FSDF
Retention time (min)	Intensity(mAU)		Retention time (min)	Intensity(mAU)		Retention time (min)	Intensity(mAU)
0.00113	-0.06396		0.00113	-0.12797		0.00322	-0.54669
0.00447	-0.06479		0.00447	-0.12749		0.00655	-0.54979
0.0078	-0.06557		0.0078	-0.12696		0.00988	-0.55289
0.01113	-0.06622		0.01113	-0.12648		0.01322	-0.55599
0.01447	-0.06682		0.01447	-0.126		0.01655	-0.55909
0.0178	-0.06729		0.0178	-0.12547		0.01988	-0.56213
0.02113	-0.06771		0.02113	-0.12499		0.02322	-0.56517
0.02447	-0.06807		0.02447	-0.12445		0.02655	-0.56827
0.0278	-0.06837		0.0278	-0.12386		0.02988	-0.57131
0.03113	-0.06866		0.03113	-0.12326		0.03322	-0.57441
0.03447	-0.06896		0.03447	-0.12261		0.03655	-0.57745
0.0378	-0.06938		0.0378	-0.12189		0.03988	-0.58049
0.04113	-0.0698		0.04113	-0.12112		0.04322	-0.58347
0.04447	-0.07033		0.04447	-0.12028		0.04655	-0.58645
0.0478	-0.07093		0.0478	-0.11945		0.04988	-0.58943
0.05113	-0.07159		0.05113	-0.11861		0.05322	-0.59229
0.05447	-0.0723		0.05447	-0.11778		0.05655	-0.59515
0.0578	-0.07302		0.0578	-0.11694		0.05988	-0.59789
0.06113	-0.07373		0.06113	-0.11617		0.06322	-0.60064
0.06447	-0.07445		0.06447	-0.11545		0.06655	-0.60338
0.0678	-0.07516		0.0678	-0.1148		0.06988	-0.60612
0.07113	-0.07582		0.07113	-0.1142		0.07322	-0.6088
0.07447	-0.07641		0.07447	-0.11361		0.07655	-0.6116
0.0778	-0.07701		0.0778	-0.11307		0.07988	-0.6144
0.08113	-0.07755		0.08113	-0.11247		0.08322	-0.61733
0.08447	-0.07802		0.08447	-0.11194		0.08655	-0.62031
0.0878	-0.07844		0.0878	-0.11134		0.08988	-0.6234
0.09113	-0.07886		0.09113	-0.11069		0.09322	-0.62662
0.09447	-0.07921		0.09447	-0.11003		0.09655	-0.62996
0.0978	-0.07957		0.0978	-0.10931		0.09988	-0.6333
0.10113	-0.07987		0.10113	-0.10866		0.10322	-0.63664
0.10447	-0.08011		0.10447	-0.10788		0.10655	-0.64003
0.1078	-0.08041		0.1078	-0.10717		0.10988	-0.64331
0.11113	-0.08065		0.11113	-0.10639		0.11322	-0.64653
0.11447	-0.08082		0.11447	-0.10562		0.11655	-0.64963
0.1178	-0.081		0.1178	-0.10478		0.11988	-0.65261
0.12113	-0.08112		0.12113	-0.10389		0.12322	-0.65547
0.12447	-0.08124		0.12447	-0.103		0.12655	-0.65827
0.1278	-0.0813		0.1278	-0.1021		0.12988	-0.66102
0.13113	-0.08142		0.13113	-0.10115		0.13322	-0.66376
0.13447	-0.08148		0.13447	-0.10014		0.13655	-0.6665
0.1378	-0.0816		0.1378	-0.09918		0.13988	-0.66924
0.14113	-0.08178		0.14113	-0.09817		0.14322	-0.67204
0.14447	-0.08202		0.14447	-0.09716		0.14655	-0.67484
0.1478	-0.08237		0.1478	-0.09614		0.14988	-0.6777
0.15113	-0.08273		0.15113	-0.09519		0.15322	-0.68063
0.15447	-0.08315		0.15447	-0.09423		0.15655	-0.68355
0.1578	-0.08363		0.1578	-0.09322		0.15988	-0.68647
0.16113	-0.08416		0.16113	-0.09233		0.16322	-0.68939
0.16447	-0.08464		0.16447	-0.09137		0.16655	-0.69231
0.1678	-0.08518		0.1678	-0.09048		0.16988	-0.69517
0.17113	-0.08565		0.17113	-0.08953		0.17322	-0.69803
0.17447	-0.08613		0.17447	-0.08863		0.17655	-0.70077
0.1778	-0.08661		0.1778	-0.08768		0.17988	-0.70351
0.18113	-0.08708		0.18113	-0.08667		0.18322	-0.70614
0.18447	-0.08756		0.18447	-0.08559		0.18655	-0.70864
0.1878	-0.08804		0.1878	-0.0844		0.18988	-0.71114
0.19113	-0.08857		0.19113	-0.08321		0.19322	-0.71365
0.19447	-0.08911		0.19447	-0.0819		0.19655	-0.71609
0.1978	-0.0897		0.1978	-0.08059		0.19988	-0.71865
0.20113	-0.0903		0.20113	-0.07927		0.20322	-0.72122
0.20447	-0.09096		0.20447	-0.07796		0.20655	-0.7239
0.2078	-0.09155		0.2078	-0.07665		0.20988	-0.72664
0.21113	-0.09221		0.21113	-0.07546		0.21322	-0.72944
0.21447	-0.09286		0.21447	-0.07433		0.21655	-0.7323
0.2178	-0.09352		0.2178	-0.07319		0.21988	-0.73522
0.22113	-0.09418		0.22113	-0.07218		0.22322	-0.73814
0.22447	-0.09483		0.22447	-0.07117		0.22655	-0.74106
0.2278	-0.09549		0.2278	-0.07021		0.22988	-0.74393
0.23113	-0.09608		0.23113	-0.0692		0.23322	-0.74685
0.23447	-0.09674		0.23447	-0.06813		0.23655	-0.74977
0.2378	-0.09727		0.2378	-0.06706		0.23988	-0.75269
0.24113	-0.09781		0.24113	-0.06586		0.24322	-0.75561
0.24447	-0.09829		0.24447	-0.06467		0.24655	-0.75865
0.2478	-0.09871		0.2478	-0.06342		0.24988	-0.76163
0.25113	-0.09906		0.25113	-0.06211		0.25322	-0.76467
0.25447	-0.09936		0.25447	-0.0608		0.25655	-0.76765
0.2578	-0.09966		0.2578	-0.05955		0.25988	-0.77063
0.26113	-0.0999		0.26113	-0.05835		0.26322	-0.77355
0.26447	-0.10014		0.26447	-0.05716		0.26655	-0.77641
0.2678	-0.10037		0.2678	-0.05603		0.26988	-0.77921
0.27113	-0.10061		0.27113	-0.05496		0.27322	-0.78195
0.27447	-0.10085		0.27447	-0.05394		0.27655	-0.7847
0.2778	-0.10109		0.2778	-0.05293		0.27988	-0.78738
0.28113	-0.10139		0.28113	-0.05186		0.28322	-0.79012
0.28447	-0.10163		0.28447	-0.05078		0.28655	-0.79286
0.2878	-0.10186		0.2878	-0.04971		0.28988	-0.79566
0.29113	-0.10216		0.29113	-0.04852		0.29322	-0.79846
0.29447	-0.10246		0.29447	-0.04733		0.29655	-0.80127
0.2978	-0.10276		0.2978	-0.04607		0.29988	-0.80413
0.30113	-0.10312		0.30113	-0.04476		0.30322	-0.80693
0.30447	-0.10359		0.30447	-0.04345		0.30655	-0.80967
0.3078	-0.10407		0.3078	-0.04214		0.30988	-0.81235
0.31113	-0.10455		0.31113	-0.04083		0.31322	-0.81503
0.31447	-0.10508		0.31447	-0.03958		0.31655	-0.8176
0.3178	-0.10568		0.3178	-0.03833		0.31988	-0.82016
0.32113	-0.10616		0.32113	-0.03713		0.32322	-0.82266
0.32447	-0.10669		0.32447	-0.03594		0.32655	-0.82523
0.3278	-0.10717		0.3278	-0.03475		0.32988	-0.82773
0.33113	-0.10753		0.33113	-0.0335		0.33322	-0.83035
0.33447	-0.10788		0.33447	-0.03225		0.33655	-0.83297
0.3378	-0.10812		0.3378	-0.03093		0.33988	-0.8356
0.34113	-0.10836		0.34113	-0.02962		0.34322	-0.83828
0.34447	-0.10854		0.34447	-0.02825		0.34655	-0.84102
0.3478	-0.10872		0.3478	-0.02682		0.34988	-0.8437
0.35113	-0.10896		0.35113	-0.02545		0.35322	-0.84645
0.35447	-0.10914		0.35447	-0.02408		0.35655	-0.84919
0.3578	-0.10931		0.3578	-0.02271		0.35988	-0.85187
0.36113	-0.10955		0.36113	-0.02146		0.36322	-0.85455
0.36447	-0.10985		0.36447	-0.02021		0.36655	-0.85717
0.3678	-0.11009		0.3678	-0.01895		0.36988	-0.85986
0.37113	-0.11033		0.37113	-0.01776		0.37322	-0.86248
0.37447	-0.11063		0.37447	-0.01651		0.37655	-0.8651
0.3778	-0.11086		0.3778	-0.01532		0.37988	-0.86778
0.38113	-0.1111		0.38113	-0.01401		0.38322	-0.87041
0.38447	-0.1114		0.38447	-0.0127		0.38655	-0.87309
0.3878	-0.11164		0.3878	-0.01138		0.38988	-0.87583
0.39113	-0.11194		0.39113	-0.01001		0.39322	-0.87851
0.39447	-0.11224		0.39447	-0.00864		0.39655	-0.88131
0.3978	-0.11247		0.3978	-0.00727		0.39988	-0.88406
0.40113	-0.11271		0.40113	-0.00596		0.40322	-0.88686
0.40447	-0.11295		0.40447	-0.00471		0.40655	-0.8896
0.4078	-0.11313		0.4078	-0.00352		0.40988	-0.89234
0.41113	-0.11331		0.41113	-0.00238		0.41322	-0.89502
0.41447	-0.11337		0.41447	-0.00125		0.41655	-0.89765
0.4178	-0.11349		0.4178	-5.96046e-05		0.41988	-0.90021
0.42113	-0.11355		0.42113	0.00107		0.42322	-0.90265
0.42447	-0.11367		0.42447	0.00232		0.42655	-0.9051
0.4278	-0.11373		0.4278	0.00358		0.42988	-0.90754
0.43113	-0.1139		0.43113	0.00495		0.43322	-0.90992
0.43447	-0.11402		0.43447	0.00638		0.43655	-0.91237
0.4378	-0.1142		0.4378	0.00787		0.43988	-0.91487
0.44113	-0.11438		0.44113	0.00942		0.44322	-0.91749
0.44447	-0.11462		0.44447	0.01097		0.44655	-0.92018
0.4478	-0.1148		0.4478	0.01252		0.44988	-0.92292
0.45113	-0.11504		0.45113	0.01401		0.45322	-0.92584
0.45447	-0.11528		0.45447	0.01544		0.45655	-0.92876
0.4578	-0.11551		0.4578	0.01675		0.45988	-0.93168
0.46113	-0.11575		0.46113	0.018		0.46322	-0.93466
0.46447	-0.11605		0.46447	0.01913		0.46655	-0.93758
0.4678	-0.11635		0.4678	0.02021		0.46988	-0.94038
0.47113	-0.11671		0.47113	0.02116		0.47322	-0.94318
0.47447	-0.11712		0.47447	0.02205		0.47655	-0.94581
0.4778	-0.11754		0.4778	0.02295		0.47988	-0.94837
0.48113	-0.11796		0.48113	0.02378		0.48322	-0.95081
0.48447	-0.11837		0.48447	0.02468		0.48655	-0.9532
0.4878	-0.11879		0.4878	0.02557		0.48988	-0.95552
0.49113	-0.11915		0.49113	0.02652		0.49322	-0.95779
0.49447	-0.11945		0.49447	0.02754		0.49655	-0.96005
0.4978	-0.11975		0.4978	0.02861		0.49988	-0.96238
0.50113	-0.11998		0.50113	0.02968		0.50322	-0.96464
0.50447	-0.12016		0.50447	0.03082		0.50655	-0.96691
0.5078	-0.12034		0.5078	0.03183		0.50988	-0.96917
0.51113	-0.12046		0.51113	0.0329		0.51322	-0.9715
0.51447	-0.12058		0.51447	0.03386		0.51655	-0.97382
0.5178	-0.12076		0.5178	0.03481		0.51988	-0.97609
0.52113	-0.12094		0.52113	0.0357		0.52322	-0.97841
0.52447	-0.12112		0.52447	0.03654		0.52655	-0.98068
0.5278	-0.12136		0.5278	0.03737		0.52988	-0.983
0.53113	-0.12159		0.53113	0.03821		0.53322	-0.98532
0.53447	-0.12183		0.53447	0.03898		0.53655	-0.98771
0.5378	-0.12213		0.5378	0.03982		0.53988	-0.99003
0.54113	-0.12231		0.54113	0.04065		0.54322	-0.99242
0.54447	-0.12249		0.54447	0.04143		0.54655	-0.9948
0.5478	-0.12261		0.5478	0.04226		0.54988	-0.99725
0.55113	-0.12261		0.55113	0.04303		0.55322	-0.99963
0.55447	-0.12261		0.55447	0.04381		0.55655	-1.00207
0.5578	-0.12255		0.5578	0.04452		0.55988	-1.00452
0.56113	-0.12243		0.56113	0.0453		0.56322	-1.0069
0.56447	-0.12231		0.56447	0.04607		0.56655	-1.00935
0.5678	-0.12213		0.5678	0.04691		0.56988	-1.01179
0.57113	-0.12207		0.57113	0.0478		0.57322	-1.01423
0.57447	-0.12201		0.57447	0.04876		0.57655	-1.01668
0.5778	-0.12201		0.5778	0.04983		0.57988	-1.01912
0.58113	-0.12207		0.58113	0.05096		0.58322	-1.02162
0.58447	-0.12225		0.58447	0.05215		0.58655	-1.02413
0.5878	-0.12249		0.5878	0.05335		0.58988	-1.02669
0.59113	-0.12279		0.59113	0.05448		0.59322	-1.02919
0.59447	-0.12314		0.59447	0.05555		0.59655	-1.03176
0.5978	-0.1235		0.5978	0.05651		0.59988	-1.03426
0.60113	-0.12386		0.60113	0.05734		0.60322	-1.03676
0.60447	-0.12416		0.60447	0.05811		0.60655	-1.03921
0.6078	-0.12445		0.6078	0.05871		0.60988	-1.04165
0.61113	-0.12469		0.61113	0.05925		0.61322	-1.04403
0.61447	-0.12481		0.61447	0.05972		0.61655	-1.0463
0.6178	-0.12487		0.6178	0.06026		0.61988	-1.04856
0.62113	-0.12481		0.62113	0.06074		0.62322	-1.05083
0.62447	-0.12475		0.62447	0.06139		0.62655	-1.05304
0.6278	-0.12469		0.6278	0.06205		0.62988	-1.0553
0.63113	-0.12463		0.63113	0.06282		0.63322	-1.05751
0.63447	-0.12457		0.63447	0.06372		0.63655	-1.05971
0.6378	-0.12457		0.6378	0.06461		0.63988	-1.06198
0.64113	-0.12469		0.64113	0.06551		0.64322	-1.06418
0.64447	-0.12481		0.64447	0.06634		0.64655	-1.06645
0.6478	-0.12499		0.6478	0.06711		0.64988	-1.06877
0.65113	-0.12523		0.65113	0.06783		0.65322	-1.0711
0.65447	-0.12553		0.65447	0.06849		0.65655	-1.07348
0.6578	-0.12577		0.6578	0.06902		0.65988	-1.07592
0.66113	-0.126		0.66113	0.06956		0.66322	-1.07837
0.66447	-0.12624		0.66447	0.06998		0.66655	-1.08087
0.6678	-0.12648		0.6678	0.07045		0.66988	-1.08343
0.67113	-0.12666		0.67113	0.07087		0.67322	-1.08594
0.67447	-0.12684		0.67447	0.07135		0.67655	-1.08844
0.6778	-0.1269		0.6778	0.07188		0.67988	-1.09094
0.68113	-0.12696		0.68113	0.07242		0.68322	-1.09333
0.68447	-0.12696		0.68447	0.07308		0.68655	-1.09571
0.6878	-0.1269		0.6878	0.07379		0.68988	-1.09798
0.69113	-0.12684		0.69113	0.07457		0.69322	-1.10024
0.69447	-0.12672		0.69447	0.07534		0.69655	-1.10245
0.6978	-0.1266		0.6978	0.07612		0.69988	-1.10459
0.70113	-0.12654		0.70113	0.07695		0.70322	-1.10674
0.70447	-0.12648		0.70447	0.07778		0.70655	-1.10894
0.7078	-0.12648		0.7078	0.07862		0.70988	-1.11109
0.71113	-0.12648		0.71113	0.07933		0.71322	-1.1133
0.71447	-0.1266		0.71447	0.08011		0.71655	-1.11556
0.7178	-0.12666		0.7178	0.08076		0.71988	-1.11783
0.72113	-0.12672		0.72113	0.08142		0.72322	-1.12009
0.72447	-0.12678		0.72447	0.08208		0.72655	-1.12236
0.7278	-0.12684		0.7278	0.08267		0.72988	-1.12462
0.73113	-0.12684		0.73113	0.08321		0.73322	-1.12689
0.73447	-0.12678		0.73447	0.08374		0.73655	-1.12909
0.7378	-0.12672		0.7378	0.08428		0.73988	-1.13124
0.74113	-0.1266		0.74113	0.08482		0.74322	-1.13338
0.74447	-0.12642		0.74447	0.08535		0.74655	-1.13547
0.7478	-0.12624		0.7478	0.08589		0.74988	-1.1375
0.75113	-0.12606		0.75113	0.08643		0.75322	-1.13946
0.75447	-0.12589		0.75447	0.08702		0.75655	-1.14143
0.7578	-0.12571		0.7578	0.08756		0.75988	-1.1434
0.76113	-0.12553		0.76113	0.0881		0.76322	-1.14524
0.76447	-0.12541		0.76447	0.08863		0.76655	-1.14709
0.7678	-0.12535		0.7678	0.08923		0.76988	-1.14894
0.77113	-0.12541		0.77113	0.0897		0.77322	-1.15073
0.77447	-0.12553		0.77447	0.09024		0.77655	-1.15252
0.7778	-0.12577		0.7778	0.09078		0.77988	-1.15436
0.78113	-0.12606		0.78113	0.09131		0.78322	-1.15621
0.78447	-0.12636		0.78447	0.09191		0.78655	-1.15806
0.7878	-0.12666		0.7878	0.09251		0.78988	-1.15991
0.79113	-0.1269		0.79113	0.09304		0.79322	-1.16187
0.79447	-0.12702		0.79447	0.09364		0.79655	-1.16384
0.7978	-0.12708		0.7978	0.09423		0.79988	-1.16587
0.80113	-0.12702		0.80113	0.09483		0.80322	-1.16789
0.80447	-0.12684		0.80447	0.09537		0.80655	-1.17004
0.8078	-0.12666		0.8078	0.0959		0.80988	-1.17218
0.81113	-0.12642		0.81113	0.09644		0.81322	-1.17439
0.81447	-0.12618		0.81447	0.09692		0.81655	-1.17671
0.8178	-0.126		0.8178	0.09733		0.81988	-1.17904
0.82113	-0.12583		0.82113	0.09781		0.82322	-1.18142
0.82447	-0.12577		0.82447	0.09829		0.82655	-1.18381
0.8278	-0.12565		0.8278	0.09871		0.82988	-1.18625
0.83113	-0.12559		0.83113	0.09918		0.83322	-1.1887
0.83447	-0.12559		0.83447	0.09972		0.83655	-1.19108
0.8378	-0.12559		0.8378	0.1002		0.83988	-1.1934
0.84113	-0.12565		0.84113	0.10067		0.84322	-1.19573
0.84447	-0.12571		0.84447	0.10121		0.84655	-1.19793
0.8478	-0.12583		0.8478	0.10169		0.84988	-1.20008
0.85113	-0.12594		0.85113	0.10216		0.85322	-1.20217
0.85447	-0.12612		0.85447	0.10264		0.85655	-1.20419
0.8578	-0.12636		0.8578	0.10312		0.85988	-1.20616
0.86113	-0.1266		0.86113	0.10365		0.86322	-1.20813
0.86447	-0.12684		0.86447	0.10419		0.86655	-1.21009
0.8678	-0.12708		0.8678	0.10478		0.86988	-1.212
0.87113	-0.12732		0.87113	0.10544		0.87322	-1.21397
0.87447	-0.12755		0.87447	0.1061		0.87655	-1.21593
0.8778	-0.12773		0.8778	0.10675		0.87988	-1.2179
0.88113	-0.12797		0.88113	0.10747		0.88322	-1.21987
0.88447	-0.12815		0.88447	0.10806		0.88655	-1.22184
0.8878	-0.12833		0.8878	0.1086		0.88988	-1.2238
0.89113	-0.12845		0.89113	0.10908		0.89322	-1.22577
0.89447	-0.12863		0.89447	0.10943		0.89655	-1.22768
0.8978	-0.12869		0.8978	0.10979		0.89988	-1.22952
0.90113	-0.12875		0.90113	0.11003		0.90322	-1.23131
0.90447	-0.12881		0.90447	0.11033		0.90655	-1.23304
0.9078	-0.12887		0.9078	0.11063		0.90988	-1.23471
0.91113	-0.12887		0.91113	0.11098		0.91322	-1.23638
0.91447	-0.12892		0.91447	0.11134		0.91655	-1.23799
0.9178	-0.12898		0.9178	0.11182		0.91988	-1.23966
0.92113	-0.1291		0.92113	0.11241		0.92322	-1.24133
0.92447	-0.12922		0.92447	0.11301		0.92655	-1.243
0.9278	-0.1294		0.9278	0.11361		0.92988	-1.24472
0.93113	-0.12952		0.93113	0.11432		0.93322	-1.24651
0.93447	-0.12964		0.93447	0.11498		0.93655	-1.24836
0.9378	-0.12982		0.9378	0.11569		0.93988	-1.25021
0.94113	-0.12988		0.94113	0.11635		0.94322	-1.25206
0.94447	-0.12994		0.94447	0.117		0.94655	-1.25396
0.9478	-0.12994		0.9478	0.11766		0.94988	-1.25581
0.95113	-0.12988		0.95113	0.11832		0.95322	-1.25772
0.95447	-0.12982		0.95447	0.11891		0.95655	-1.25957
0.9578	-0.12964		0.9578	0.11945		0.95988	-1.26141
0.96113	-0.12946		0.96113	0.12004		0.96322	-1.2632
0.96447	-0.12916		0.96447	0.12064		0.96655	-1.26499
0.9678	-0.12881		0.9678	0.12124		0.96988	-1.26672
0.97113	-0.12839		0.97113	0.12195		0.97322	-1.26845
0.97447	-0.12785		0.97447	0.12279		0.97655	-1.27012
0.9778	-0.1272		0.9778	0.12368		0.97988	-1.27178
0.98113	-0.12642		0.98113	0.12475		0.98322	-1.27339
0.98447	-0.12553		0.98447	0.12589		0.98655	-1.27494
0.9878	-0.12457		0.9878	0.12708		0.98988	-1.27649
0.99113	-0.1235		0.99113	0.12827		0.99322	-1.27798
0.99447	-0.12237		0.99447	0.12952		0.99655	-1.27953
0.9978	-0.12118		0.9978	0.13065		0.99988	-1.28108
1.00113	-0.11986		1.00113	0.13167		1.00322	-1.28269
1.00447	-0.11861		1.00447	0.13256		1.00655	-1.2843
1.0078	-0.11724		1.0078	0.13334		1.00988	-1.28591
1.01113	-0.11587		1.01113	0.13393		1.01322	-1.28758
1.01447	-0.11444		1.01447	0.13447		1.01655	-1.28931
1.0178	-0.11295		1.0178	0.13483		1.01988	-1.29092
1.02113	-0.11152		1.02113	0.13512		1.02322	-1.29253
1.02447	-0.11003		1.02447	0.13542		1.02655	-1.29408
1.0278	-0.10866		1.0278	0.13566		1.02988	-1.29557
1.03113	-0.10735		1.03113	0.1359		1.03322	-1.29694
1.03447	-0.10616		1.03447	0.13626		1.03655	-1.29825
1.0378	-0.10508		1.0378	0.13667		1.03988	-1.29956
1.04113	-0.10425		1.04113	0.13715		1.04322	-1.30075
1.04447	-0.10353		1.04447	0.13775		1.04655	-1.302
1.0478	-0.10294		1.0478	0.1384		1.04988	-1.30332
1.05113	-0.10252		1.05113	0.13912		1.05322	-1.30463
1.05447	-0.10222		1.05447	0.13989		1.05655	-1.306
1.0578	-0.10204		1.0578	0.14067		1.05988	-1.30743
1.06113	-0.10186		1.06113	0.1415		1.06322	-1.30892
1.06447	-0.1018		1.06447	0.14234		1.06655	-1.31047
1.0678	-0.10186		1.0678	0.14317		1.06988	-1.31202
1.07113	-0.10192		1.07113	0.14395		1.07322	-1.31363
1.07447	-0.10204		1.07447	0.14466		1.07655	-1.31518
1.0778	-0.10228		1.0778	0.14538		1.07988	-1.31679
1.08113	-0.10258		1.08113	0.14609		1.08322	-1.3184
1.08447	-0.10288		1.08447	0.14675		1.08655	-1.32006
1.0878	-0.10329		1.0878	0.1474		1.08988	-1.32179
1.09113	-0.10365		1.09113	0.14806		1.09322	-1.32358
1.09447	-0.10413		1.09447	0.14871		1.09655	-1.32537
1.0978	-0.10455		1.0978	0.14937		1.09988	-1.32722
1.10113	-0.10496		1.10113	0.15008		1.10322	-1.32906
1.10447	-0.10544		1.10447	0.15086		1.10655	-1.33097
1.1078	-0.10592		1.1078	0.15163		1.10988	-1.33282
1.11113	-0.10633		1.11113	0.15253		1.11322	-1.33467
1.11447	-0.10681		1.11447	0.15342		1.11655	-1.3364
1.1178	-0.10723		1.1178	0.15432		1.11988	-1.33812
1.12113	-0.10753		1.12113	0.15521		1.12322	-1.33979
1.12447	-0.10771		1.12447	0.15604		1.12655	-1.3414
1.1278	-0.10777		1.1278	0.15688		1.12988	-1.34295
1.13113	-0.10759		1.13113	0.15759		1.13322	-1.34438
1.13447	-0.10717		1.13447	0.15825		1.13655	-1.34581
1.1378	-0.10657		1.1378	0.15885		1.13988	-1.34724
1.14113	-0.10574		1.14113	0.15944		1.14322	-1.34861
1.14447	-0.10473		1.14447	0.15998		1.14655	-1.34993
1.1478	-0.10353		1.1478	0.16052		1.14988	-1.35124
1.15113	-0.10216		1.15113	0.16117		1.15322	-1.35261
1.15447	-0.10061		1.15447	0.16183		1.15655	-1.35398
1.1578	-0.099		1.1578	0.16254		1.15988	-1.35535
1.16113	-0.09722		1.16113	0.16338		1.16322	-1.35678
1.16447	-0.09537		1.16447	0.16415		1.16655	-1.35827
1.1678	-0.09346		1.1678	0.16505		1.16988	-1.35976
1.17113	-0.09149		1.17113	0.16588		1.17322	-1.36125
1.17447	-0.08947		1.17447	0.16677		1.17655	-1.36274
1.1778	-0.08756		1.1778	0.16767		1.17988	-1.36417
1.18113	-0.08565		1.18113	0.16856		1.18322	-1.36554
1.18447	-0.08392		1.18447	0.16946		1.18655	-1.36691
1.1878	-0.08237		1.1878	0.17041		1.18988	-1.36822
1.19113	-0.08106		1.19113	0.17136		1.19322	-1.36954
1.19447	-0.08005		1.19447	0.17238		1.19655	-1.37085
1.1978	-0.07927		1.1978	0.17345		1.19988	-1.37222
1.20113	-0.0788		1.20113	0.17458		1.20322	-1.37359
1.20447	-0.07862		1.20447	0.17577		1.20655	-1.37508
1.2078	-0.07874		1.2078	0.17697		1.20988	-1.37663
1.21113	-0.0791		1.21113	0.17816		1.21322	-1.37824
1.21447	-0.07969		1.21447	0.17929		1.21655	-1.37991
1.2178	-0.08053		1.2178	0.18042		1.21988	-1.38164
1.22113	-0.08148		1.22113	0.18144		1.22322	-1.38336
1.22447	-0.08255		1.22447	0.18239		1.22655	-1.38509
1.2278	-0.08374		1.2278	0.18322		1.22988	-1.38682
1.23113	-0.085		1.23113	0.18394		1.23322	-1.38855
1.23447	-0.08631		1.23447	0.18454		1.23655	-1.39022
1.2378	-0.08774		1.2378	0.18507		1.23988	-1.39189
1.24113	-0.08911		1.24113	0.18555		1.24322	-1.39356
1.24447	-0.09048		1.24447	0.18603		1.24655	-1.39523
1.2478	-0.09191		1.2478	0.18656		1.24988	-1.39689
1.25113	-0.09328		1.25113	0.1871		1.25322	-1.3985
1.25447	-0.09471		1.25447	0.18775		1.25655	-1.40011
1.2578	-0.09602		1.2578	0.18847		1.25988	-1.40172
1.26113	-0.09733		1.26113	0.18924		1.26322	-1.40333
1.26447	-0.09859		1.26447	0.19014		1.26655	-1.40488
1.2678	-0.09978		1.2678	0.19109		1.26988	-1.40643
1.27113	-0.10085		1.27113	0.19211		1.27322	-1.40804
1.27447	-0.10192		1.27447	0.19306		1.27655	-1.40965
1.2778	-0.10288		1.2778	0.19407		1.27988	-1.41126
1.28113	-0.10383		1.28113	0.19497		1.28322	-1.41293
1.28447	-0.10473		1.28447	0.19586		1.28655	-1.41472
1.2878	-0.1055		1.2878	0.1967		1.28988	-1.4165
1.29113	-0.10633		1.29113	0.19747		1.29322	-1.41841
1.29447	-0.10705		1.29447	0.19825		1.29655	-1.42032
1.2978	-0.10777		1.2978	0.19896		1.29988	-1.42235
1.30113	-0.10842		1.30113	0.19974		1.30322	-1.42431
1.30447	-0.10902		1.30447	0.20051		1.30655	-1.42634
1.3078	-0.10961		1.3078	0.20134		1.30988	-1.42831
1.31113	-0.11015		1.31113	0.20224		1.31322	-1.43021
1.31447	-0.11069		1.31447	0.20325		1.31655	-1.432
1.3178	-0.11122		1.3178	0.20432		1.31988	-1.43373
1.32113	-0.11176		1.32113	0.20552		1.32322	-1.43534
1.32447	-0.11224		1.32447	0.20671		1.32655	-1.43683
1.3278	-0.11283		1.3278	0.20796		1.32988	-1.4382
1.33113	-0.11337		1.33113	0.20927		1.33322	-1.43951
1.33447	-0.11402		1.33447	0.21058		1.33655	-1.44076
1.3378	-0.11462		1.3378	0.21189		1.33988	-1.44196
1.34113	-0.11522		1.34113	0.21321		1.34322	-1.44315
1.34447	-0.11581		1.34447	0.21458		1.34655	-1.44434
1.3478	-0.11641		1.3478	0.21595		1.34988	-1.44553
1.35113	-0.11688		1.35113	0.21732		1.35322	-1.44672
1.35447	-0.1173		1.35447	0.21869		1.35655	-1.44792
1.3578	-0.11766		1.3578	0.22		1.35988	-1.44917
1.36113	-0.1179		1.36113	0.22137		1.36322	-1.45042
1.36447	-0.11814		1.36447	0.22268		1.36655	-1.45167
1.3678	-0.11832		1.3678	0.22399		1.36988	-1.45298
1.37113	-0.11843		1.37113	0.22531		1.37322	-1.45435
1.37447	-0.11855		1.37447	0.22668		1.37655	-1.45566
1.3778	-0.11867		1.3778	0.22805		1.37988	-1.4571
1.38113	-0.11891		1.38113	0.22948		1.38322	-1.45847
1.38447	-0.11915		1.38447	0.23085		1.38655	-1.45984
1.3878	-0.11945		1.3878	0.23234		1.38988	-1.46121
1.39113	-0.11986		1.39113	0.23377		1.39322	-1.46258
1.39447	-0.12034		1.39447	0.23526		1.39655	-1.46389
1.3978	-0.12088		1.3978	0.23675		1.39988	-1.4652
1.40113	-0.12147		1.40113	0.23824		1.40322	-1.46645
1.40447	-0.12213		1.40447	0.23967		1.40655	-1.4677
1.4078	-0.12279		1.4078	0.24116		1.40988	-1.46884
1.41113	-0.12344		1.41113	0.24259		1.41322	-1.46997
1.41447	-0.12416		1.41447	0.24408		1.41655	-1.47104
1.4178	-0.12481		1.4178	0.24551		1.41988	-1.47212
1.42113	-0.12541		1.42113	0.24694		1.42322	-1.47319
1.42447	-0.12606		1.42447	0.24837		1.42655	-1.47432
1.4278	-0.12666		1.4278	0.24974		1.42988	-1.47545
1.43113	-0.12732		1.43113	0.25111		1.43322	-1.47665
1.43447	-0.12791		1.43447	0.25243		1.43655	-1.4779
1.4378	-0.12863		1.4378	0.25374		1.43988	-1.47915
1.44113	-0.12934		1.44113	0.25505		1.44322	-1.48046
1.44447	-0.13006		1.44447	0.2563		1.44655	-1.48177
1.4478	-0.13089		1.4478	0.25755		1.44988	-1.48302
1.45113	-0.13173		1.45113	0.25874		1.45322	-1.48433
1.45447	-0.13256		1.45447	0.26		1.45655	-1.48565
1.4578	-0.13345		1.4578	0.26119		1.45988	-1.4869
1.46113	-0.13441		1.46113	0.26238		1.46322	-1.48821
1.46447	-0.1353		1.46447	0.26363		1.46655	-1.48946
1.4678	-0.13626		1.4678	0.26488		1.46988	-1.49077
1.47113	-0.13715		1.47113	0.26613		1.47322	-1.49208
1.47447	-0.1381		1.47447	0.26745		1.47655	-1.49339
1.4778	-0.13894		1.4778	0.26882		1.47988	-1.49465
1.48113	-0.13983		1.48113	0.27031		1.48322	-1.49584
1.48447	-0.14061		1.48447	0.2718		1.48655	-1.49685
1.4878	-0.14138		1.4878	0.27341		1.48988	-1.49781
1.49113	-0.14204		1.49113	0.27502		1.49322	-1.49858
1.49447	-0.14263		1.49447	0.2768		1.49655	-1.49912
1.4978	-0.14311		1.4978	0.27859		1.49988	-1.49953
1.50113	-0.14347		1.50113	0.2805		1.50322	-1.49983
1.50447	-0.14377		1.50447	0.28247		1.50655	-1.50001
1.5078	-0.144		1.5078	0.28449		1.50988	-1.50013
1.51113	-0.14412		1.51113	0.28664		1.51322	-1.50019
1.51447	-0.14412		1.51447	0.28884		1.51655	-1.50019
1.5178	-0.14406		1.5178	0.29111		1.51988	-1.50025
1.52113	-0.14389		1.52113	0.29349		1.52322	-1.50037
1.52447	-0.14353		1.52447	0.29588		1.52655	-1.50043
1.5278	-0.14305		1.5278	0.29832		1.52988	-1.50055
1.53113	-0.14246		1.53113	0.30082		1.53322	-1.50067
1.53447	-0.14168		1.53447	0.30339		1.53655	-1.50073
1.5378	-0.14073		1.5378	0.30595		1.53988	-1.50079
1.54113	-0.13953		1.54113	0.30863		1.54322	-1.50084
1.54447	-0.13816		1.54447	0.31137		1.54655	-1.50079
1.5478	-0.13661		1.5478	0.31412		1.54988	-1.50079
1.55113	-0.13483		1.55113	0.31692		1.55322	-1.50079
1.55447	-0.13292		1.55447	0.31972		1.55655	-1.50079
1.5578	-0.13095		1.5578	0.32246		1.55988	-1.50084
1.56113	-0.12892		1.56113	0.3252		1.56322	-1.50096
1.56447	-0.1269		1.56447	0.32783		1.56655	-1.5012
1.5678	-0.12493		1.5678	0.33039		1.56988	-1.5015
1.57113	-0.12314		1.57113	0.33277		1.57322	-1.50192
1.57447	-0.12147		1.57447	0.33498		1.57655	-1.50251
1.5778	-0.12004		1.5778	0.33706		1.57988	-1.50317
1.58113	-0.11879		1.58113	0.33903		1.58322	-1.504
1.58447	-0.11772		1.58447	0.34082		1.58655	-1.5049
1.5878	-0.11677		1.5878	0.34255		1.58988	-1.50597
1.59113	-0.11599		1.59113	0.34416		1.59322	-1.5071
1.59447	-0.11528		1.59447	0.34565		1.59655	-1.50841
1.5978	-0.11468		1.5978	0.34714		1.59988	-1.50973
1.60113	-0.11414		1.60113	0.34857		1.60322	-1.51116
1.60447	-0.11373		1.60447	0.34994		1.60655	-1.51271
1.6078	-0.11337		1.6078	0.35131		1.60988	-1.51426
1.61113	-0.11313		1.61113	0.35268		1.61322	-1.51587
1.61447	-0.11301		1.61447	0.35411		1.61655	-1.51747
1.6178	-0.11295		1.6178	0.35554		1.61988	-1.51914
1.62113	-0.11301		1.62113	0.35697		1.62322	-1.52075
1.62447	-0.11313		1.62447	0.35846		1.62655	-1.52236
1.6278	-0.11325		1.6278	0.36001		1.62988	-1.52397
1.63113	-0.11343		1.63113	0.36156		1.63322	-1.52546
1.63447	-0.11355		1.63447	0.36317		1.63655	-1.52689
1.6378	-0.11361		1.6378	0.36478		1.63988	-1.52826
1.64113	-0.11361		1.64113	0.36645		1.64322	-1.52951
1.64447	-0.11349		1.64447	0.36806		1.64655	-1.53065
1.6478	-0.11319		1.6478	0.36973		1.64988	-1.53172
1.65113	-0.11283		1.65113	0.3714		1.65322	-1.53267
1.65447	-0.11224		1.65447	0.37307		1.65655	-1.53357
1.6578	-0.11152		1.6578	0.37479		1.65988	-1.5344
1.66113	-0.11063		1.66113	0.37664		1.66322	-1.53512
1.66447	-0.10961		1.66447	0.37861		1.66655	-1.53577
1.6678	-0.10836		1.6678	0.38064		1.66988	-1.53643
1.67113	-0.10699		1.67113	0.3829		1.67322	-1.53697
1.67447	-0.10538		1.67447	0.38534		1.67655	-1.53744
1.6778	-0.10359		1.6778	0.38791		1.67988	-1.53786
1.68113	-0.10169		1.68113	0.39059		1.68322	-1.53822
1.68447	-0.09954		1.68447	0.39333		1.68655	-1.53852
1.6878	-0.09722		1.6878	0.39613		1.68988	-1.53875
1.69113	-0.09471		1.69113	0.39887		1.69322	-1.53893
1.69447	-0.09209		1.69447	0.40156		1.69655	-1.53905
1.6978	-0.08935		1.6978	0.40418		1.69988	-1.53929
1.70113	-0.08643		1.70113	0.40662		1.70322	-1.53953
1.70447	-0.08351		1.70447	0.40895		1.70655	-1.53995
1.7078	-0.08059		1.7078	0.41109		1.70988	-1.5406
1.71113	-0.07772		1.71113	0.41306		1.71322	-1.54155
1.71447	-0.07498		1.71447	0.41485		1.71655	-1.54281
1.7178	-0.07242		1.7178	0.41634		1.71988	-1.54448
1.72113	-0.07021		1.72113	0.41747		1.72322	-1.54662
1.72447	-0.06831		1.72447	0.41831		1.72655	-1.54907
1.7278	-0.06676		1.7278	0.41878		1.72988	-1.55193
1.73113	-0.06562		1.73113	0.41884		1.73322	-1.55491
1.73447	-0.06491		1.73447	0.41854		1.73655	-1.55801
1.7378	-0.06449		1.7378	0.41801		1.73988	-1.56093
1.74113	-0.06431		1.74113	0.41729		1.74322	-1.56355
1.74447	-0.06413		1.74447	0.41664		1.74655	-1.56552
1.7478	-0.06372		1.7478	0.41628		1.74988	-1.56665
1.75113	-0.06288		1.75113	0.41634		1.75322	-1.56665
1.75447	-0.06121		1.75447	0.41717		1.75655	-1.5654
1.7578	-0.05847		1.7578	0.41896		1.75988	-1.56254
1.76113	-0.05442		1.76113	0.42182		1.76322	-1.55807
1.76447	-0.0487		1.76447	0.42599		1.76655	-1.55181
1.7678	-0.04119		1.7678	0.43154		1.76988	-1.5437
1.77113	-0.03183		1.77113	0.43845		1.77322	-1.53375
1.77447	-0.02056		1.77447	0.44662		1.77655	-1.522
1.7778	-0.00751		1.7778	0.45604		1.77988	-1.50853
1.78113	0.00715		1.78113	0.46641		1.78322	-1.49345
1.78447	0.02313		1.78447	0.47761		1.78655	-1.47682
1.7878	0.04017		1.7878	0.48935		1.78988	-1.45876
1.79113	0.05788		1.79113	0.50145		1.79322	-1.43939
1.79447	0.07594		1.79447	0.51367		1.79655	-1.41871
1.7978	0.09394		1.7978	0.52589		1.79988	-1.3966
1.80113	0.11152		1.80113	0.53793		1.80322	-1.37311
1.80447	0.12839		1.80447	0.54973		1.80655	-1.34796
1.8078	0.1443		1.8078	0.56124		1.80988	-1.3209
1.81113	0.15897		1.81113	0.57262		1.81322	-1.29157
1.81447	0.17226		1.81447	0.58389		1.81655	-1.25957
1.8178	0.18412		1.8178	0.59521		1.81988	-1.2244
1.82113	0.19431		1.82113	0.60683		1.82322	-1.18554
1.82447	0.20295		1.82447	0.61905		1.82655	-1.14226
1.8278	0.20993		1.8278	0.63211		1.82988	-1.09386
1.83113	0.21535		1.83113	0.64641		1.83322	-1.03968
1.83447	0.21929		1.83447	0.66221		1.83655	-0.97883
1.8378	0.22185		1.8378	0.68003		1.83988	-0.91052
1.84113	0.22316		1.84113	0.70029		1.84322	-0.83375
1.84447	0.22328		1.84447	0.72336		1.84655	-0.74756
1.8478	0.22244		1.8478	0.74983		1.84988	-0.651
1.85113	0.22078		1.85113	0.78017		1.85322	-0.54294
1.85447	0.21851		1.85447	0.81497		1.85655	-0.42224
1.8578	0.21577		1.8578	0.85479		1.85988	-0.28777
1.86113	0.21273		1.86113	0.90039		1.86322	-0.13828
1.86447	0.20957		1.86447	0.95242		1.86655	0.02766
1.8678	0.20641		1.8678	1.01179		1.86988	0.21136
1.87113	0.20337		1.87113	1.07932		1.87322	0.41431
1.87447	0.20063		1.87447	1.15615		1.87655	0.63801
1.8778	0.19825		1.8778	1.24347		1.87988	0.884
1.88113	0.19628		1.88113	1.34242		1.88322	1.15389
1.88447	0.19479		1.88447	1.45459		1.88655	1.44929
1.8878	0.19389		1.8878	1.58161		1.88988	1.77181
1.89113	0.1936		1.89113	1.72526		1.89322	2.12306
1.89447	0.19389		1.89447	1.88768		1.89655	2.50453
1.8978	0.19485		1.8978	2.07108		1.89988	2.91789
1.90113	0.1964		1.90113	2.27815		1.90322	3.36444
1.90447	0.19854		1.90447	2.51162		1.90655	3.84569
1.9078	0.20123		1.9078	2.77466		1.90988	4.36282
1.91113	0.2045		1.91113	3.07029		1.91322	4.91673
1.91447	0.2082		1.91447	3.40176		1.91655	5.50807
1.9178	0.21231		1.9178	3.77208		1.91988	6.13701
1.92113	0.21672		1.92113	4.18383		1.92322	6.8031
1.92447	0.22149		1.92447	4.63891		1.92655	7.50548
1.9278	0.2265		1.9278	5.13858		1.92988	8.24243
1.93113	0.23174		1.93113	5.68271		1.93322	9.01198
1.93447	0.23723		1.93447	6.27041		1.93655	9.81164
1.9378	0.24301		1.9378	6.8996		1.93988	10.639
1.94113	0.24909		1.94113	7.56735		1.94322	11.4924
1.94447	0.25558		1.94447	8.27068		1.94655	12.3712
1.9478	0.26262		1.9478	9.00674		1.94988	13.2769
1.95113	0.27049		1.95113	9.77409		1.95322	14.2134
1.95447	0.27949		1.95447	10.573		1.95655	15.1873
1.9578	0.29004		1.9578	11.4067		1.95988	16.2088
1.96113	0.30267		1.96113	12.2811		1.96322	17.2902
1.96447	0.31793		1.96447	13.2056		1.96655	18.4461
1.9678	0.33635		1.9678	14.1919		1.96988	19.6917
1.97113	0.35864		1.97113	15.2535		1.97322	21.0409
1.97447	0.38522		1.97447	16.4038		1.97655	22.5043
1.9778	0.41646		1.9778	17.6547		1.97988	24.0872
1.98113	0.45246		1.98113	19.0141		1.98322	25.7875
1.98447	0.49311		1.98447	20.4841		1.98655	27.5938
1.9878	0.53799		1.9878	22.059		1.98988	29.4847
1.99113	0.58627		1.99113	23.7242		1.99322	31.4284
1.99447	0.63694		1.99447	25.456		1.99655	33.3836
1.9978	0.68867		1.9978	27.221		1.99988	35.301
2.00113	0.73999		2.00113	28.9786		2.00322	37.1261
2.00447	0.78934		2.00447	30.682		2.00655	38.8026
2.0078	0.835		2.0078	32.2815		2.00988	40.2755
2.01113	0.87559		2.01113	33.7279		2.01322	41.4957
2.01447	0.90963		2.01447	34.9752		2.01655	42.4233
2.0178	0.93615		2.0178	35.9846		2.01988	43.0303
2.02113	0.95421		2.02113	36.7271		2.02322	43.3029
2.02447	0.96351		2.02447	37.1853		2.02655	43.2425
2.0278	0.96399		2.0278	37.3549		2.02988	42.8652
2.03113	0.956		2.03113	37.2443		2.03322	42.1999
2.03447	0.9402		2.03447	36.8739		2.03655	41.2868
2.0378	0.91773		2.0378	36.2741		2.03988	40.1731
2.04113	0.88978		2.04113	35.4823		2.04322	38.91
2.04447	0.85777		2.04447	34.5403		2.04655	37.5493
2.0478	0.8232		2.0478	33.4907		2.04988	36.1395
2.05113	0.78744		2.05113	32.3743		2.05322	34.7245
2.05447	0.75173		2.05447	31.2275		2.05655	33.3407
2.0578	0.71698		2.0578	30.0808		2.05988	32.0173
2.06113	0.68378		2.06113	28.9579		2.06322	30.7761
2.06447	0.65255		2.06447	27.8754		2.06655	29.632
2.0678	0.62323		2.0678	26.8435		2.06988	28.5945
2.07113	0.59545		2.07113	25.8671		2.07322	27.6693
2.07447	0.56893		2.07447	24.947		2.07655	26.8593
2.0778	0.54306		2.0778	24.0812		2.07988	26.166
2.08113	0.51731		2.08113	23.2661		2.08322	25.5906
2.08447	0.49144		2.08447	22.4979		2.08655	25.1342
2.0878	0.4651		2.0878	21.7729		2.08988	24.7983
2.09113	0.43827		2.09113	21.0877		2.09322	24.5844
2.09447	0.41115		2.09447	20.44		2.09655	24.4936
2.0978	0.38409		2.0978	19.8278		2.09988	24.5265
2.10113	0.35751		2.10113	19.2498		2.10322	24.6824
2.10447	0.33188		2.10447	18.7045		2.10655	24.9587
2.1078	0.30762		2.1078	18.1907		2.10988	25.3509
2.11113	0.28515		2.11113	17.7069		2.11322	25.8523
2.11447	0.26476		2.11447	17.2517		2.11655	26.4538
2.1178	0.24676		2.1178	16.8238		2.11988	27.1441
2.12113	0.23109		2.12113	16.4217		2.12322	27.9099
2.12447	0.2178		2.12447	16.045		2.12655	28.7362
2.1278	0.20695		2.1278	15.6936		2.12988	29.6069
2.13113	0.19854		2.13113	15.3679		2.13322	30.5043
2.13447	0.19276		2.13447	15.0693		2.13655	31.4106
2.1378	0.18984		2.1378	14.7996		2.13988	32.3078
2.14113	0.19044		2.14113	14.5611		2.14322	33.178
2.14447	0.19544		2.14447	14.3555		2.14655	34.0046
2.1478	0.20629		2.1478	14.1845		2.14988	34.7725
2.15113	0.22477		2.15113	14.0486		2.15322	35.4691
2.15447	0.25338		2.15447	13.9474		2.15655	36.0855
2.1578	0.29534		2.1578	13.8792		2.15988	36.6172
2.16113	0.35435		2.16113	13.8412		2.16322	37.065
2.16447	0.43511		2.16447	13.8294		2.16655	37.4358
2.1678	0.54276		2.1678	13.8398		2.16988	37.7436
2.17113	0.68307		2.17113	13.8684		2.17322	38.009
2.17447	0.86224		2.17447	13.9126		2.17655	38.2596
2.1778	1.08653		2.1778	13.971		2.17988	38.5283
2.18113	1.36191		2.18113	14.0454		2.18322	38.8523
2.18447	1.69349		2.18447	14.1401		2.18655	39.2708
2.1878	2.08527		2.1878	14.2632		2.18988	39.8225
2.19113	2.5394		2.19113	14.4258		2.19322	40.5422
2.19447	3.05563		2.19447	14.6421		2.19655	41.4588
2.1978	3.63094		2.1978	14.9282		2.19988	42.5921
2.20113	4.25935		2.20113	15.3015		2.20322	43.9507
2.20447	4.93151		2.20447	15.7784		2.20655	45.5319
2.2078	5.6352		2.2078	16.3734		2.20988	47.3204
2.21113	6.35535		2.21113	17.0973		2.21322	49.2911
2.21447	7.07501		2.21447	17.9557		2.21655	51.4101
2.2178	7.77578		2.2178	18.9479		2.21988	53.6386
2.22113	8.43924		2.22113	20.0664		2.22322	55.9366
2.22447	9.04763		2.22447	21.2972		2.22655	58.2659
2.2278	9.58508		2.2278	22.6197		2.22988	60.5939
2.23113	10.0385		2.23113	24.0087		2.23322	62.8948
2.23447	10.3983		2.23447	25.4355		2.23655	65.1506
2.2378	10.6587		2.2378	26.8695		2.23988	67.3501
2.24113	10.8183		2.24113	28.2804		2.24322	69.4867
2.24447	10.8795		2.24447	29.6398		2.24655	71.5548
2.2478	10.8483		2.2478	30.9218		2.24988	73.5462
2.25113	10.7338		2.25113	32.1045		2.25322	75.4466
2.25447	10.5476		2.25447	33.1694		2.25655	77.2328
2.2578	10.3028		2.2578	34.102		2.25988	78.8718
2.26113	10.0137		2.26113	34.8908		2.26322	80.3214
2.26447	9.69529		2.26447	35.5267		2.26655	81.5328
2.2678	9.36276		2.2678	36.003		2.26988	82.4555
2.27113	9.03183		2.27113	36.3146		2.27322	83.0423
2.27447	8.71885		2.27447	36.4581		2.27655	83.2561
2.2778	8.44157		2.2778	36.432		2.27988	83.0755
2.28113	8.21984		2.28113	36.2374		2.28322	82.4998
2.28447	8.07679		2.28447	35.878		2.28655	81.5522
2.2878	8.03971		2.2878	35.3611		2.28988	80.2807
2.29113	8.14128		2.29113	34.698		2.29322	78.7571
2.29447	8.41981		2.29447	33.9036		2.29655	77.0729
2.2978	8.91942		2.2978	32.9967		2.29988	75.3338
2.30113	9.68903		2.30113	31.9994		2.30322	73.6519
2.30447	10.7805		2.30447	30.9361		2.30655	72.1373
2.3078	12.2444		2.3078	29.8325		2.30988	70.8891
2.31113	14.1261		2.31113	28.7152		2.31322	69.9869
2.31447	16.4593		2.31447	27.6096		2.31655	69.4838
2.3178	19.2592		2.3178	26.5398		2.31988	69.4019
2.32113	22.5165		2.32113	25.528		2.32322	69.7317
2.32447	26.1916		2.32447	24.5938		2.32655	70.4354
2.3278	30.2116		2.3278	23.7555		2.32988	71.4553
2.33113	34.4694		2.33113	23.0312		2.33322	72.7244
2.33447	38.8281		2.33447	22.4402		2.33655	74.1783
2.3378	43.1277		2.3378	22.0066		2.33988	75.7659
2.34113	47.1962		2.34113	21.7595		2.34322	77.4546
2.34447	50.8627		2.34447	21.7333		2.34655	79.2323
2.3478	53.9722		2.3478	21.9663		2.34988	81.1025
2.35113	56.3981		2.35113	22.496		2.35322	83.0749
2.35447	58.0538		2.35447	23.3532		2.35655	85.1525
2.3578	58.8992		2.3578	24.5554		2.35988	87.3184
2.36113	58.9427		2.36113	26.1		2.36322	89.5236
2.36447	58.2379		2.36447	27.9589		2.36655	91.6811
2.3678	56.876		2.3678	30.075		2.36988	93.6682
2.37113	54.9749		2.37113	32.3628		2.37322	95.3365
2.37447	52.6663		2.37447	34.7132		2.37655	96.53
2.3778	50.0838		2.3778	37.003		2.37988	97.1056
2.38113	47.3516		2.38113	39.1069		2.38322	96.9518
2.38447	44.5767		2.38447	40.91		2.38655	96.0047
2.3878	41.8443		2.3878	42.3199		2.38988	94.2556
2.39113	39.2162		2.39113	43.2749		2.39322	91.7521
2.39447	36.7321		2.39447	43.7481		2.39655	88.5916
2.3978	34.4129		2.3978	43.748		2.39988	84.9087
2.40113	32.2649		2.40113	43.314		2.40322	80.8584
2.40447	30.2845		2.40447	42.5094		2.40655	76.5989
2.4078	28.4614		2.4078	41.4122		2.40988	72.2761
2.41113	26.7826		2.41113	40.1053		2.41322	68.0124
2.41447	25.2338		2.41447	38.6674		2.41655	63.9005
2.4178	23.801		2.4178	37.1675		2.41988	60.002
2.42113	22.4709		2.42113	35.6599		2.42322	56.3503
2.42447	21.2312		2.42447	34.184		2.42655	52.9552
2.4278	20.0709		2.4278	32.7643		2.42988	49.8085
2.43113	18.98		2.43113	31.4128		2.43322	46.8907
2.43447	17.9496		2.43447	30.1323		2.43655	44.1757
2.4378	16.9725		2.4378	28.9183		2.43988	41.6359
2.44113	16.0425		2.44113	27.7629		2.44322	39.2447
2.44447	15.1549		2.44447	26.6563		2.44655	36.9794
2.4478	14.3064		2.4478	25.5892		2.44988	34.8225
2.45113	13.495		2.45113	24.5538		2.45322	32.7622
2.45447	12.7196		2.45447	23.5449		2.45655	30.7921
2.4578	11.9799		2.4578	22.5596		2.45988	28.9106
2.46113	11.2759		2.46113	21.5983		2.46322	27.1199
2.46447	10.6084		2.46447	20.6633		2.46655	25.4245
2.4678	9.97752		2.4678	19.7592		2.46988	23.8299
2.47113	9.38368		2.47113	18.891		2.47322	22.3411
2.47447	8.82697		2.47447	18.0646		2.47655	20.9622
2.4778	8.3071		2.4778	17.2852		2.47988	19.6952
2.48113	7.82353		2.48113	16.5572		2.48322	18.5399
2.48447	7.3753		2.48447	15.8836		2.48655	17.4937
2.4878	6.96117		2.4878	15.2661		2.48988	16.5522
2.49113	6.5797		2.49113	14.7048		2.49322	15.7092
2.49447	6.22916		2.49447	14.1982		2.49655	14.9572
2.4978	5.90783		2.4978	13.7442		2.49988	14.2881
2.50113	5.61386		2.50113	13.3395		2.50322	13.6937
2.50447	5.34523		2.50447	12.9802		2.50655	13.1656
2.5078	5.10013		2.5078	12.6621		2.50988	12.696
2.51113	4.87685		2.51113	12.3811		2.51322	12.2775
2.51447	4.67366		2.51447	12.1331		2.51655	11.9036
2.5178	4.489		2.5178	11.9142		2.51988	11.5686
2.52113	4.32158		2.52113	11.7208		2.52322	11.2674
2.52447	4.17006		2.52447	11.5496		2.52655	10.9959
2.5278	4.03339		2.5278	11.3979		2.52988	10.7506
2.53113	3.91054		2.53113	11.2631		2.53322	10.5286
2.53447	3.80063		2.53447	11.1433		2.53655	10.3278
2.5378	3.70282		2.5378	11.0366		2.53988	10.1462
2.54113	3.61657		2.54113	10.9415		2.54322	9.98265
2.54447	3.54117		2.54447	10.8569		2.54655	9.83608
2.5478	3.47614		2.5478	10.7818		2.54988	9.7059
2.55113	3.42119		2.55113	10.7154		2.55322	9.59146
2.55447	3.37583		2.55447	10.6571		2.55655	9.49264
2.5578	3.34001		2.5578	10.6062		2.55988	9.40919
2.56113	3.31348		2.56113	10.5624		2.56322	9.34106
2.56447	3.29632		2.56447	10.5252		2.56655	9.28819
2.5678	3.28845		2.5678	10.4942		2.56988	9.25058
2.57113	3.29		2.57113	10.469		2.57322	9.22799
2.57447	3.30126		2.57447	10.4492		2.57655	9.2203
2.5778	3.32236		2.5778	10.4346		2.57988	9.22716
2.58113	3.35377		2.58113	10.4245		2.58322	9.24814
2.58447	3.39586		2.58447	10.4188		2.58655	9.28253
2.5878	3.44914		2.5878	10.4167		2.58988	9.32968
2.59113	3.51405		2.59113	10.4178		2.59322	9.38874
2.59447	3.59124		2.59447	10.4216		2.59655	9.45866
2.5978	3.68112		2.5978	10.4273		2.59988	9.53823
2.60113	3.7843		2.60113	10.4343		2.60322	9.62633
2.60447	3.90118		2.60447	10.4417		2.60655	9.72152
2.6078	4.03214		2.6078	10.4489		2.60988	9.82231
2.61113	4.17745		2.61113	10.455		2.61322	9.92721
2.61447	4.33719		2.61447	10.4589		2.61655	10.0346
2.6178	4.51148		2.6178	10.4599		2.61988	10.1427
2.62113	4.70006		2.62113	10.4571		2.62322	10.25
2.62447	4.9026		2.62447	10.4495		2.62655	10.3548
2.6278	5.11861		2.6278	10.4363		2.62988	10.4554
2.63113	5.34719		2.63113	10.4168		2.63322	10.5505
2.63447	5.58746		2.63447	10.3901		2.63655	10.6387
2.6378	5.8381		2.6378	10.3558		2.63988	10.7185
2.64113	6.09767		2.64113	10.3132		2.64322	10.7893
2.64447	6.36446		2.64447	10.262		2.64655	10.8499
2.6478	6.63638		2.6478	10.2019		2.64988	10.9001
2.65113	6.91128		2.65113	10.1328		2.65322	10.9391
2.65447	7.18665		2.65447	10.0547		2.65655	10.967
2.6578	7.45982		2.6578	9.96763		2.65988	10.9837
2.66113	7.72792		2.66113	9.8719		2.66322	10.9894
2.66447	7.98798		2.66447	9.76795		2.66655	10.9848
2.6678	8.237		2.6678	9.65619		2.66988	10.9703
2.67113	8.47185		2.67113	9.53728		2.67322	10.9468
2.67447	8.6897		2.67447	9.41193		2.67655	10.9152
2.6778	8.88771		2.6778	9.28092		2.67988	10.8765
2.68113	9.06336		2.68113	9.14508		2.68322	10.8319
2.68447	9.21458		2.68447	9.00531		2.68655	10.7824
2.6878	9.33945		2.6878	8.8625		2.68988	10.7293
2.69113	9.43667		2.69113	8.7176		2.69322	10.6737
2.69447	9.50533		2.69447	8.57151		2.69655	10.6168
2.6978	9.54509		2.6978	8.42512		2.69988	10.5599
2.70113	9.556		2.70113	8.27932		2.70322	10.5039
2.70447	9.53865		2.70447	8.13502		2.70655	10.4499
2.7078	9.49425		2.7078	7.9931		2.70988	10.3988
2.71113	9.42421		2.71113	7.85428		2.71322	10.3516
2.71447	9.33045		2.71447	7.71946		2.71655	10.3089
2.7178	9.21535		2.7178	7.5894		2.71988	10.2715
2.72113	9.08136		2.72113	7.46477		2.72322	10.2398
2.72447	8.93128		2.72447	7.34627		2.72655	10.2143
2.7278	8.76802		2.7278	7.23457		2.72988	10.1954
2.73113	8.59457		2.73113	7.13027		2.73322	10.1833
2.73447	8.41379		2.73447	7.03388		2.73655	10.1781
2.7378	8.2286		2.7378	6.94597		2.73988	10.1801
2.74113	8.04174		2.74113	6.86699		2.74322	10.1891
2.74447	7.85565		2.74447	6.79725		2.74655	10.2053
2.7478	7.67267		2.7478	6.73711		2.74988	10.2285
2.75113	7.49493		2.75113	6.68681		2.75322	10.2587
2.75447	7.32422		2.75447	6.64651		2.75655	10.2956
2.7578	7.16215		2.7578	6.61641		2.75988	10.3393
2.76113	7.01004		2.76113	6.59645		2.76322	10.3895
2.76447	6.86902		2.76447	6.58661		2.76655	10.4459
2.7678	6.74015		2.7678	6.58697		2.76988	10.5087
2.77113	6.6241		2.77113	6.59728		2.77322	10.5774
2.77447	6.52164		2.77447	6.61749		2.77655	10.6521
2.7778	6.43313		2.7778	6.64729		2.77988	10.7326
2.78113	6.35916		2.78113	6.68657		2.78322	10.8189
2.78447	6.30003		2.78447	6.73503		2.78655	10.9108
2.7878	6.2561		2.7878	6.79225		2.78988	11.0085
2.79113	6.22767		2.79113	6.85793		2.79322	11.1119
2.79447	6.21521		2.79447	6.93166		2.79655	11.2211
2.7978	6.21921		2.7978	7.01308		2.79988	11.3364
2.80113	6.24013		2.80113	7.10171		2.80322	11.4579
2.80447	6.27881		2.80447	7.1972		2.80655	11.586
2.8078	6.33597		2.8078	7.29918		2.80988	11.721
2.81113	6.41263		2.81113	7.40725		2.81322	11.8635
2.81447	6.51002		2.81447	7.52115		2.81655	12.0142
2.8178	6.62953		2.8178	7.64072		2.81988	12.174
2.82113	6.7727		2.82113	7.76577		2.82322	12.3438
2.82447	6.9415		2.82447	7.89636		2.82655	12.525
2.8278	7.13807		2.8278	8.03256		2.82988	12.719
2.83113	7.36487		2.83113	8.17472		2.83322	12.9279
2.83447	7.62469		2.83447	8.32325		2.83655	13.1537
2.8378	7.92062		2.8378	8.47882		2.83988	13.3994
2.84113	8.25632		2.84113	8.64244		2.84322	13.6682
2.84447	8.63546		2.84447	8.81529		2.84655	13.9646
2.8478	9.06229		2.8478	8.99911		2.84988	14.2938
2.85113	9.54098		2.85113	9.19598		2.85322	14.6626
2.85447	10.0759		2.85447	9.40889		2.85655	15.08
2.8578	10.6715		2.8578	9.64171		2.85988	15.5579
2.86113	11.3321		2.86113	9.8998		2.86322	16.1129
2.86447	12.0624		2.86447	10.1909		2.86655	16.7682
2.8678	12.868		2.8678	10.5266		2.86988	17.5568
2.87113	13.756		2.87113	10.9242		2.87322	18.5248
2.87447	14.7372		2.87447	11.4095		2.87655	19.736
2.8778	15.8271		2.8778	12.0199		2.87988	21.2762
2.88113	17.0482		2.88113	12.8089		2.88322	23.2557
2.88447	18.4309		2.88447	13.8491		2.88655	25.8118
2.8878	20.0132		2.8878	15.2359		2.88988	29.1067
2.89113	21.8388		2.89113	17.0882		2.89322	33.3216
2.89447	23.9534		2.89447	19.5473		2.89655	38.648
2.8978	26.399		2.8978	22.7725		2.89988	45.2735
2.90113	29.207		2.90113	26.9327		2.90322	53.3663
2.90447	32.3904		2.90447	32.1955		2.90655	63.0572
2.9078	35.9368		2.9078	38.7132		2.90988	74.423
2.91113	39.8037		2.91113	46.6089		2.91322	87.4708
2.91447	43.9165		2.91447	55.9612		2.91655	102.127
2.9178	48.1697		2.9178	66.7913		2.91988	118.227
2.92113	52.4334		2.92113	79.0516		2.92322	135.519
2.92447	56.5621		2.92447	92.6182		2.92655	153.663
2.9278	60.4061		2.9278	107.288		2.92988	172.243
2.93113	63.8238		2.93113	122.782		2.93322	190.784
2.93447	66.6922		2.93447	138.749		2.93655	208.773
2.9378	68.9165		2.9378	154.784		2.93988	225.685
2.94113	70.4353		2.94113	170.442		2.94322	241.008
2.94447	71.2226		2.94447	185.259		2.94655	254.271
2.9478	71.2866		2.9478	198.781		2.94988	265.079
2.95113	70.6648		2.95113	210.586		2.95322	273.131
2.95447	69.4184		2.95447	220.313		2.95655	278.241
2.9578	67.625		2.9578	227.688		2.95988	280.349
2.96113	65.3712		2.96113	232.536		2.96322	279.52
2.96447	62.7471		2.96447	234.796		2.96655	275.935
2.9678	59.8411		2.9678	234.519		2.96988	269.869
2.97113	56.7361		2.97113	231.861		2.97322	261.668
2.97447	53.5076		2.97447	227.064		2.97655	251.716
2.9778	50.222		2.9778	220.432		2.97988	240.41
2.98113	46.9361		2.98113	212.307		2.98322	228.132
2.98447	43.6972		2.98447	203.041		2.98655	215.23
2.9878	40.5432		2.9878	192.973		2.98988	202.001
2.99113	37.5031		2.99113	182.41		2.99322	188.695
2.99447	34.5985		2.99447	171.617		2.99655	175.507
2.9978	31.8437		2.9978	160.809		2.99988	162.591
3.00113	29.2478		3.00113	150.155		3.00322	150.064
3.00447	26.815		3.00447	139.781		3.00655	138.014
3.0078	24.5465		3.0078	129.782		3.00988	126.512
3.01113	22.4409		3.01113	120.221		3.01322	115.608
3.01447	20.4949		3.01447	111.145		3.01655	105.341
3.0178	18.7047		3.0178	102.585		3.01988	95.739
3.02113	17.0654		3.02113	94.5594		3.02322	86.8136
3.02447	15.5717		3.02447	87.079		3.02655	78.5658
3.0278	14.2183		3.0278	80.1452		3.02988	70.9839
3.03113	12.9997		3.03113	73.752		3.03322	64.0459
3.03447	11.9104		3.03447	67.8868		3.03655	57.7219
3.0378	10.9452		3.0378	62.5313		3.03988	51.9766
3.04113	10.0991		3.04113	57.663		3.04322	46.7724
3.04447	9.36729		3.04447	53.2569		3.04655	42.0725
3.0478	8.74585		3.0478	49.2874		3.04988	37.8421
3.05113	8.2311		3.05113	45.7291		3.05322	34.0497
3.05447	7.82007		3.05447	42.5584		3.05655	30.6672
3.0578	7.51013		3.0578	39.7533		3.05988	27.6693
3.06113	7.29901		3.06113	37.2937		3.06322	25.0328
3.06447	7.18451		3.06447	35.1605		3.06655	22.7348
3.0678	7.1643		3.0678	33.3354		3.06988	20.7526
3.07113	7.23547		3.07113	31.7993		3.07322	19.0625
3.07447	7.39467		3.07447	30.5324		3.07655	17.6396
3.0778	7.6375		3.0778	29.5137		3.07988	16.4584
3.08113	7.95859		3.08113	28.7206		3.08322	15.4924
3.08447	8.35139		3.08447	28.1295		3.08655	14.7157
3.0878	8.80826		3.0878	27.7159		3.08988	14.1025
3.09113	9.3202		3.09113	27.4549		3.09322	13.6285
3.09447	9.87744		3.09447	27.3221		3.09655	13.2709
3.0978	10.4691		3.0978	27.2937		3.09988	13.009
3.10113	11.0838		3.10113	27.3474		3.10322	12.8238
3.10447	11.7097		3.10447	27.4625		3.10655	12.6989
3.1078	12.3347		3.1078	27.6198		3.10988	12.6193
3.11113	12.9471		3.11113	27.8025		3.11322	12.5725
3.11447	13.5357		3.11447	27.9956		3.11655	12.5473
3.1178	14.0899		3.1178	28.1863		3.11988	12.5343
3.12113	14.6004		3.12113	28.3639		3.12322	12.5256
3.12447	15.0588		3.12447	28.5194		3.12655	12.5148
3.1278	15.4582		3.1278	28.6457		3.12988	12.4965
3.13113	15.7934		3.13113	28.7372		3.13322	12.4667
3.13447	16.0603		3.13447	28.79		3.13655	12.4224
3.1378	16.2565		3.1378	28.801		3.13988	12.3618
3.14113	16.3811		3.14113	28.7684		3.14322	12.2836
3.14447	16.4342		3.14447	28.6912		3.14655	12.1881
3.1478	16.4174		3.1478	28.5687		3.14988	12.0757
3.15113	16.3334		3.15113	28.4013		3.15322	11.9479
3.15447	16.1856		3.15447	28.1892		3.15655	11.8067
3.1578	15.9783		3.1578	27.9334		3.15988	11.6543
3.16113	15.7167		3.16113	27.635		3.16322	11.4933
3.16447	15.4061		3.16447	27.2955		3.16655	11.3266
3.1678	15.0523		3.1678	26.9169		3.16988	11.1569
3.17113	14.6616		3.17113	26.5016		3.17322	10.9867
3.17447	14.2399		3.17447	26.0523		3.17655	10.8184
3.1778	13.7935		3.1778	25.5725		3.17988	10.654
3.18113	13.3281		3.18113	25.0661		3.18322	10.495
3.18447	12.8493		3.18447	24.5377		3.18655	10.3424
3.1878	12.3624		3.1878	23.9919		3.18988	10.1969
3.19113	11.872		3.19113	23.4342		3.19322	10.0583
3.19447	11.3824		3.19447	22.8697		3.19655	9.92626
3.1978	10.8972		3.1978	22.3038		3.19988	9.7999
3.20113	10.4193		3.20113	21.7417		3.20322	9.67795
3.20447	9.95147		3.20447	21.1884		3.20655	9.55892
3.2078	9.49568		3.2078	20.6479		3.20988	9.44114
3.21113	9.05341		3.21113	20.124		3.21322	9.32276
3.21447	8.62581		3.21447	19.6195		3.21655	9.20206
3.2178	8.2137		3.2178	19.1369		3.21988	9.07743
3.22113	7.81751		3.22113	18.6775		3.22322	8.94737
3.22447	7.43741		3.22447	18.2421		3.22655	8.8107
3.2278	7.0734		3.2278	17.8309		3.22988	8.66652
3.23113	6.72537		3.23113	17.4435		3.23322	8.5144
3.23447	6.39307		3.23447	17.0792		3.23655	8.35425
3.2378	6.07616		3.2378	16.7369		3.23988	8.1864
3.24113	5.77432		3.24113	16.4154		3.24322	8.01158
3.24447	5.48732		3.24447	16.1133		3.24655	7.83098
3.2478	5.21493		3.2478	15.8293		3.24988	7.64596
3.25113	4.9569		3.25113	15.5619		3.25322	7.45839
3.25447	4.71306		3.25447	15.3099		3.25655	7.27004
3.2578	4.48334		3.2578	15.0721		3.25988	7.08312
3.26113	4.26751		3.26113	14.8473		3.26322	6.8996
3.26447	4.06545		3.26447	14.6349		3.26655	6.72162
3.2678	3.87686		3.2678	14.4339		3.26988	6.55103
3.27113	3.70151		3.27113	14.2435		3.27322	6.38968
3.27447	3.53897		3.27447	14.0632		3.27655	6.239
3.2778	3.38876		3.2778	13.8924		3.27988	6.1003
3.28113	3.25048		3.28113	13.7303		3.28322	5.97453
3.28447	3.1234		3.28447	13.5768		3.28655	5.86236
3.2878	3.00699		3.2878	13.431		3.28988	5.76401
3.29113	2.90048		3.29113	13.2925		3.29322	5.67943
3.29447	2.80321		3.29447	13.1607		3.29655	5.6082
3.2978	2.71434		3.2978	13.0349		3.29988	5.54961
3.30113	2.63321		3.30113	12.9147		3.30322	5.50258
3.30447	2.55907		3.30447	12.7991		3.30655	5.46587
3.3078	2.49124		3.3078	12.6876		3.30988	5.43779
3.31113	2.42901		3.31113	12.5794		3.31322	5.41675
3.31447	2.37185		3.31447	12.4738		3.31655	5.40084
3.3178	2.3191		3.3178	12.3704		3.31988	5.38814
3.32113	2.27034		3.32113	12.2683		3.32322	5.37664
3.32447	2.22504		3.32447	12.167		3.32655	5.36454
3.3278	2.18284		3.3278	12.0662		3.32988	5.34993
3.33113	2.14332		3.33113	11.9655		3.33322	5.3311
3.33447	2.10631		3.33447	11.8646		3.33655	5.30672
3.3378	2.07132		3.3378	11.7635		3.33988	5.27537
3.34113	2.03818		3.34113	11.662		3.34322	5.23621
3.34447	2.00665		3.34447	11.5603		3.34655	5.18847
3.3478	1.97637		3.3478	11.4585		3.34988	5.13178
3.35113	1.94722		3.35113	11.3566		3.35322	5.06604
3.35447	1.91897		3.35447	11.255		3.35655	4.99141
3.3578	1.89137		3.3578	11.1539		3.35988	4.90826
3.36113	1.86431		3.36113	11.0536		3.36322	4.81737
3.36447	1.83755		3.36447	10.9542		3.36655	4.71944
3.3678	1.81109		3.3678	10.856		3.36988	4.61543
3.37113	1.78468		3.37113	10.759		3.37322	4.50629
3.37447	1.75828		3.37447	10.6633		3.37655	4.39316
3.3778	1.73181		3.3778	10.5687		3.37988	4.27711
3.38113	1.70511		3.38113	10.4753		3.38322	4.15909
3.38447	1.67823		3.38447	10.3826		3.38655	4.04
3.3878	1.65093		3.3878	10.2903		3.38988	3.92079
3.39113	1.62333		3.39113	10.1982		3.39322	3.80212
3.39447	1.5952		3.39447	10.1058		3.39655	3.68464
3.3978	1.56653		3.3978	10.0126		3.39988	3.56877
3.40113	1.53738		3.40113	9.91827		3.40322	3.45492
3.40447	1.50764		3.40447	9.82243		3.40655	3.3434
3.4078	1.47742		3.4078	9.7248		3.40988	3.23433
3.41113	1.44666		3.41113	9.62514		3.41322	3.12781
3.41447	1.41561		3.41447	9.52339		3.41655	3.02398
3.4178	1.3842		3.4178	9.4195		3.41988	2.92295
3.42113	1.35273		3.42113	9.31352		3.42322	2.82472
3.42447	1.32132		3.42447	9.20564		3.42655	2.72936
3.4278	1.2902		3.4278	9.09626		3.42988	2.63697
3.43113	1.25951		3.43113	8.9857		3.43322	2.54774
3.43447	1.22947		3.43447	8.87442		3.43655	2.46161
3.4378	1.20026		3.4378	8.76302		3.43988	2.37888
3.44113	1.17207		3.44113	8.65209		3.44322	2.29967
3.44447	1.14512		3.44447	8.5423		3.44655	2.22403
3.4478	1.11955		3.4478	8.43418		3.44988	2.1522
3.45113	1.09547		3.45113	8.32844		3.45322	2.08431
3.45447	1.07306		3.45447	8.22562		3.45655	2.02048
3.4578	1.05244		3.4578	8.12632		3.45988	1.96081
3.46113	1.0336		3.46113	8.03095		3.46322	1.90538
3.46447	1.01662		3.46447	7.94005		3.46655	1.85418
3.4678	1.0016		3.4678	7.85387		3.46988	1.80733
3.47113	0.9886		3.47113	7.7728		3.47322	1.76471
3.47447	0.97758		3.47447	7.69693		3.47655	1.72627
3.4778	0.96852		3.4778	7.62641		3.47988	1.69194
3.48113	0.96142		3.48113	7.56133		3.48322	1.66154
3.48447	0.95624		3.48447	7.50172		3.48655	1.63502
3.4878	0.95296		3.4878	7.44748		3.48988	1.61207
3.49113	0.95159		3.49113	7.39843		3.49322	1.59258
3.49447	0.95195		3.49447	7.35456		3.49655	1.5763
3.4978	0.95409		3.4978	7.31552		3.49988	1.56313
3.50113	0.95791		3.50113	7.28118		3.50322	1.55276
3.50447	0.96333		3.50447	7.25126		3.50655	1.54501
3.5078	0.9703		3.5078	7.22557		3.50988	1.53971
3.51113	0.97877		3.51113	7.20376		3.51322	1.53673
3.51447	0.9886		3.51447	7.18558		3.51655	1.53595
3.5178	0.99987		3.5178	7.1708		3.51988	1.5372
3.52113	1.01238		3.52113	7.15917		3.52322	1.54036
3.52447	1.02621		3.52447	7.15047		3.52655	1.54549
3.5278	1.04111		3.5278	7.14451		3.52988	1.55246
3.53113	1.05715		3.53113	7.14111		3.53322	1.56122
3.53447	1.07414		3.53447	7.14022		3.53655	1.57177
3.5378	1.09202		3.5378	7.14171		3.53988	1.58411
3.54113	1.11067		3.54113	7.14552		3.54322	1.59818
3.54447	1.12993		3.54447	7.15172		3.54655	1.61397
3.5478	1.14965		3.5478	7.16037		3.54988	1.6315
3.55113	1.16974		3.55113	7.17151		3.55322	1.65063
3.55447	1.18995		3.55447	7.18534		3.55655	1.67143
3.5578	1.21015		3.5578	7.20197		3.55988	1.69379
3.56113	1.23012		3.56113	7.22146		3.56322	1.71757
3.56447	1.24973		3.56447	7.24393		3.56655	1.74266
3.5678	1.26874		3.5678	7.26956		3.56988	1.76901
3.57113	1.2871		3.57113	7.29829		3.57322	1.79631
3.57447	1.30457		3.57447	7.33012		3.57655	1.82438
3.5778	1.32102		3.5778	7.36499		3.57988	1.85305
3.58113	1.33657		3.58113	7.40272		3.58322	1.88202
3.58447	1.35112		3.58447	7.44301		3.58655	1.91116
3.5878	1.36489		3.5878	7.48551		3.58988	1.94019
3.59113	1.37818		3.59113	7.52985		3.59322	1.96898
3.59447	1.39135		3.59447	7.57551		3.59655	1.99747
3.5978	1.40512		3.5978	7.62194		3.59988	2.02572
3.60113	1.42038		3.60113	7.66855		3.60322	2.05386
3.60447	1.43838		3.60447	7.71469		3.60655	2.08235
3.6078	1.46061		3.6078	7.75987		3.60988	2.11179
3.61113	1.4891		3.61113	7.80362		3.61322	2.1432
3.61447	1.52624		3.61447	7.84558		3.61655	2.17777
3.6178	1.57505		3.6178	7.88563		3.61988	2.21747
3.62113	1.63901		3.62113	7.92384		3.62322	2.26456
3.62447	1.72222		3.62447	7.96056		3.62655	2.32208
3.6278	1.82945		3.6278	7.99656		3.62988	2.3936
3.63113	1.96582		3.63113	8.03292		3.63322	2.48361
3.63447	2.13706		3.63447	8.07124		3.63655	2.59715
3.6378	2.34938		3.6378	8.1135		3.63988	2.74032
3.64113	2.60901		3.64113	8.16226		3.64322	2.91967
3.64447	2.9223		3.64447	8.22061		3.64655	3.14265
3.6478	3.29536		3.6478	8.29202		3.64988	3.41713
3.65113	3.73387		3.65113	8.38047		3.65322	3.75152
3.65447	4.24278		3.65447	8.49044		3.65655	4.15426
3.6578	4.82589		3.6578	8.62652		3.65988	4.63396
3.66113	5.48583		3.66113	8.79365		3.66322	5.19907
3.66447	6.22368		3.66447	8.99673		3.66655	5.85723
3.6678	7.03889		3.6678	9.24057		3.66988	6.61564
3.67113	7.92915		3.67113	9.52977		3.67322	7.48032
3.67447	8.89015		3.67447	9.86856		3.67655	8.45593
3.6778	9.91607		3.6778	10.2605		3.67988	9.54568
3.68113	10.999		3.68113	10.7085		3.68322	10.7511
3.68447	12.1298		3.68447	11.2147		3.68655	12.0719
3.6878	13.2975		3.6878	11.7802		3.68988	13.5054
3.69113	14.4903		3.69113	12.4051		3.69322	15.0472
3.69447	15.6954		3.69447	13.0884		3.69655	16.6904
3.6978	16.8993		3.6978	13.828		3.69988	18.4261
3.70113	18.0884		3.70113	14.6205		3.70322	20.2432
3.70447	19.249		3.70447	15.4614		3.70655	22.1283
3.7078	20.3679		3.7078	16.345		3.70988	24.0665
3.71113	21.4324		3.71113	17.2644		3.71322	26.0406
3.71447	22.4308		3.71447	18.2118		3.71655	28.032
3.7178	23.3524		3.7178	19.1783		3.71988	30.0205
3.72113	24.188		3.72113	20.1541		3.72322	31.9848
3.72447	24.9295		3.72447	21.1287		3.72655	33.9028
3.7278	25.5706		3.7278	22.091		3.72988	35.7518
3.73113	26.1063		3.73113	23.0297		3.73322	37.5093
3.73447	26.5333		3.73447	23.9334		3.73655	39.1528
3.7378	26.8499		3.7378	24.7906		3.73988	40.6612
3.74113	27.0557		3.74113	25.5903		3.74322	42.0147
3.74447	27.1523		3.74447	26.3222		3.74655	43.1957
3.7478	27.1423		3.7478	26.9768		3.74988	44.189
3.75113	27.0297		3.75113	27.5459		3.75322	44.9828
3.75447	26.8199		3.75447	28.0225		3.75655	45.5686
3.7578	26.5194		3.7578	28.4012		3.75988	45.9415
3.76113	26.1354		3.76113	28.6784		3.76322	46.1007
3.76447	25.6758		3.76447	28.8522		3.76655	46.0488
3.7678	25.1492		3.7678	28.9225		3.76988	45.7923
3.77113	24.5643		3.77113	28.8909		3.77322	45.3411
3.77447	23.93		3.77447	28.7608		3.77655	44.7077
3.7778	23.2551		3.7778	28.5369		3.77988	43.9072
3.78113	22.5478		3.78113	28.2254		3.78322	42.9568
3.78447	21.8164		3.78447	27.8333		3.78655	41.8748
3.7878	21.0683		3.7878	27.3685		3.78988	40.6803
3.79113	20.3102		3.79113	26.8395		3.79322	39.3928
3.79447	19.5484		3.79447	26.2549		3.79655	38.0314
3.7978	18.7881		3.7978	25.6234		3.79988	36.6146
3.80113	18.0341		3.80113	24.9537		3.80322	35.1599
3.80447	17.2904		3.80447	24.2538		3.80655	33.6832
3.8078	16.56		3.8078	23.5317		3.80988	32.1993
3.81113	15.8457		3.81113	22.7944		3.81322	30.7209
3.81447	15.1493		3.81447	22.0483		3.81655	29.259
3.8178	14.4723		3.8178	21.2993		3.81988	27.8228
3.82113	13.8154		3.82113	20.5525		3.82322	26.4198
3.82447	13.1794		3.82447	19.812		3.82655	25.0557
3.8278	12.5644		3.8278	19.0817		3.82988	23.7352
3.83113	11.9702		3.83113	18.3645		3.83322	22.461
3.83447	11.3969		3.83447	17.6627		3.83655	21.2352
3.8378	10.844		3.8378	16.9783		3.83988	20.0589
3.84113	10.3112		3.84113	16.3128		3.84322	18.932
3.84447	9.79811		3.84447	15.6671		3.84655	17.8546
3.8478	9.30423		3.8478	15.0424		3.84988	16.8256
3.85113	8.82924		3.85113	14.439		3.85322	15.8439
3.85447	8.37272		3.85447	13.8575		3.85655	14.9083
3.8578	7.93427		3.8578	13.2982		3.85988	14.0172
3.86113	7.51352		3.86113	12.7614		3.86322	13.1691
3.86447	7.11012		3.86447	12.2471		3.86655	12.3625
3.8678	6.72376		3.8678	11.7556		3.86988	11.5959
3.87113	6.35415		3.87113	11.2869		3.87322	10.8678
3.87447	6.00111		3.87447	10.841		3.87655	10.1769
3.8778	5.66441		3.8778	10.4179		3.87988	9.5219
3.88113	5.34379		3.88113	10.0177		3.88322	8.90166
3.88447	5.03898		3.88447	9.64028		3.88655	8.31503
3.8878	4.74972		3.8878	9.28563		3.88988	7.761
3.89113	4.47565		3.89113	8.95369		3.89322	7.23845
3.89447	4.21649		3.89447	8.6444		3.89655	6.74641
3.8978	3.97182		3.8978	8.35764		3.89988	6.28376
3.90113	3.74115		3.90113	8.09324		3.90322	5.8496
3.90447	3.52412		3.90447	7.85094		3.90655	5.44274
3.9078	3.32022		3.9078	7.63047		3.90988	5.06228
3.91113	3.12907		3.91113	7.43163		3.91322	4.70704
3.91447	2.95007		3.91447	7.25394		3.91655	4.37593
3.9178	2.78276		3.9178	7.09695		3.91988	4.0679
3.92113	2.62666		3.92113	6.96021		3.92322	3.78174
3.92447	2.48122		3.92447	6.84315		3.92655	3.51638
3.9278	2.34592		3.9278	6.74528		3.92988	3.27069
3.93113	2.22021		3.93113	6.66589		3.93322	3.04341
3.93447	2.10351		3.93447	6.60437		3.93655	2.83343
3.9378	1.99533		3.9378	6.56015		3.93988	2.63959
3.94113	1.89513		3.94113	6.53243		3.94322	2.46084
3.94447	1.80238		3.94447	6.52063		3.94655	2.29603
3.9478	1.71673		3.9478	6.52421		3.94988	2.14422
3.95113	1.63776		3.95113	6.54256		3.95322	2.00438
3.95447	1.56498		3.95447	6.57529		3.95655	1.87558
3.9578	1.4981		3.9578	6.6219		3.95988	1.75709
3.96113	1.43683		3.96113	6.68216		3.96322	1.64801
3.96447	1.38092		3.96447	6.75583		3.96655	1.54763
3.9678	1.33008		3.9678	6.84279		3.96988	1.45531
3.97113	1.28418		3.97113	6.94305		3.97322	1.37037
3.97447	1.24294		3.97447	7.05665		3.97655	1.29223
3.9778	1.20628		3.9778	7.18391		3.97988	1.22035
3.98113	1.17409		3.98113	7.32499		3.98322	1.15418
3.98447	1.1462		3.98447	7.48032		3.98655	1.09339
3.9878	1.12253		3.9878	7.65032		3.98988	1.03748
3.99113	1.10298		3.99113	7.83545		3.99322	0.98622
3.99447	1.08755		3.99447	8.0362		3.99655	0.93925
3.9978	1.07604		3.9978	8.25292		3.99988	0.89628
4.00113	1.06847		4.00113	8.48615		4.00322	0.85717
4.00447	1.06466		4.00447	8.73619		4.00655	0.82159
4.0078	1.06454		4.0078	9.00316		4.00988	0.78946
4.01113	1.06806		4.01113	9.28718		4.01322	0.76067
4.01447	1.07509		4.01447	9.58794		4.01655	0.73498
4.0178	1.08552		4.0178	9.90516		4.01988	0.71228
4.02113	1.09923		4.02113	10.2382		4.02322	0.69249
4.02447	1.11604		4.02447	10.5861		4.02655	0.67556
4.0278	1.13589		4.0278	10.9476		4.02988	0.66137
4.03113	1.1586		4.03113	11.3213		4.03322	0.64987
4.03447	1.18387		4.03447	11.7053		4.03655	0.64099
4.0378	1.21164		4.0378	12.0978		4.03988	0.63455
4.04113	1.24151		4.04113	12.4962		4.04322	0.6305
4.04447	1.27333		4.04447	12.898		4.04655	0.62877
4.0478	1.30671		4.0478	13.3003		4.04988	0.62925
4.05113	1.34146		4.05113	13.6999		4.05322	0.63187
4.05447	1.37722		4.05447	14.0936		4.05655	0.6364
4.0578	1.41364		4.0578	14.4777		4.05988	0.64284
4.06113	1.45036		4.06113	14.8487		4.06322	0.65106
4.06447	1.48708		4.06447	15.2028		4.06655	0.6609
4.0678	1.52338		4.0678	15.5364		4.06988	0.67228
4.07113	1.5589		4.07113	15.8457		4.07322	0.6851
4.07447	1.59341		4.07447	16.1273		4.07655	0.69928
4.0778	1.62637		4.0778	16.3781		4.07988	0.7146
4.08113	1.65766		4.08113	16.5949		4.08322	0.73099
4.08447	1.68681		4.08447	16.7752		4.08655	0.74834
4.0878	1.71363		4.0878	16.917		4.08988	0.76652
4.09113	1.73789		4.09113	17.0185		4.09322	0.78541
4.09447	1.75929		4.09447	17.0784		4.09655	0.8049
4.0978	1.77777		4.0978	17.0961		4.09988	0.82481
4.10113	1.79309		4.10113	17.0715		4.10322	0.84496
4.10447	1.80519		4.10447	17.0049		4.10655	0.86534
4.1078	1.81389		4.1078	16.8972		4.10988	0.88573
4.11113	1.81925		4.11113	16.7499		4.11322	0.90605
4.11447	1.82122		4.11447	16.5647		4.11655	0.92614
4.1178	1.81973		4.1178	16.3441		4.11988	0.94593
4.12113	1.81478		4.12113	16.0907		4.12322	0.96524
4.12447	1.8065		4.12447	15.8075		4.12655	0.98401
4.1278	1.79493		4.1278	15.4976		4.12988	1.00213
4.13113	1.78015		4.13113	15.1642		4.13322	1.01942
4.13447	1.76227		4.13447	14.8109		4.13655	1.03581
4.1378	1.74141		4.1378	14.441		4.13988	1.05125
4.14113	1.71781		4.14113	14.0578		4.14322	1.06555
4.14447	1.69158		4.14447	13.6646		4.14655	1.07861
4.1478	1.66297		4.1478	13.2644		4.14988	1.09041
4.15113	1.63215		4.15113	12.8599		4.15322	1.10078
4.15447	1.59937		4.15447	12.454		4.15655	1.10966
4.1578	1.56492		4.1578	12.049		4.15988	1.11705
4.16113	1.52892		4.16113	11.6471		4.16322	1.12283
4.16447	1.49173		4.16447	11.25		4.16655	1.127
4.1678	1.45352		4.1678	10.8596		4.16988	1.12957
4.17113	1.4146		4.17113	10.477		4.17322	1.1304
4.17447	1.37514		4.17447	10.1034		4.17655	1.12963
4.1778	1.33526		4.1778	9.7397		4.17988	1.12724
4.18113	1.29533		4.18113	9.38654		4.18322	1.12319
4.18447	1.25539		4.18447	9.04435		4.18655	1.11753
4.1878	1.21558		4.1878	8.71336		4.18988	1.11032
4.19113	1.17606		4.19113	8.39382		4.19322	1.10149
4.19447	1.13696		4.19447	8.08567		4.19655	1.09112
4.1978	1.09833		4.1978	7.78896		4.19988	1.0792
4.20113	1.06031		4.20113	7.50351		4.20322	1.06585
4.20447	1.02299		4.20447	7.22927		4.20655	1.05113
4.2078	0.9864		4.2078	6.96594		4.20988	1.03509
4.21113	0.95069		4.21113	6.71339		4.21322	1.01787
4.21447	0.91588		4.21447	6.47146		4.21655	0.99957
4.2178	0.88209		4.2178	6.23983		4.21988	0.98032
4.22113	0.84931		4.22113	6.01834		4.22322	0.96029
4.22447	0.81754		4.22447	5.8068		4.22655	0.93973
4.2278	0.78684		4.2278	5.60492		4.22988	0.91863
4.23113	0.75716		4.23113	5.41264		4.23322	0.89717
4.23447	0.72855		4.23447	5.22977		4.23655	0.87559
4.2378	0.70089		4.2378	5.0562		4.23988	0.8539
4.24113	0.67419		4.24113	4.89193		4.24322	0.8322
4.24447	0.64844		4.24447	4.73696		4.24655	0.81062
4.2478	0.62364		4.2478	4.59129		4.24988	0.78928
4.25113	0.59974		4.25113	4.45509		4.25322	0.76818
4.25447	0.57673		4.25447	4.32855		4.25655	0.74738
4.2578	0.55468		4.2578	4.2119		4.25988	0.727
4.26113	0.53352		4.26113	4.10545		4.26322	0.70703
4.26447	0.51326		4.26447	4.0096		4.26655	0.68754
4.2678	0.49388		4.2678	3.92497		4.26988	0.66859
4.27113	0.47541		4.27113	3.85213		4.27322	0.65011
4.27447	0.45788		4.27447	3.79193		4.27655	0.63211
4.2778	0.44119		4.2778	3.74526		4.27988	0.61464
4.28113	0.42546		4.28113	3.71319		4.28322	0.59766
4.28447	0.41062		4.28447	3.69704		4.28655	0.5812
4.2878	0.39667		4.2878	3.69799		4.28988	0.56517
4.29113	0.38368		4.29113	3.7176		4.29322	0.54961
4.29447	0.37158		4.29447	3.75742		4.29655	0.53442
4.2978	0.36043		4.2978	3.81905		4.29988	0.51969
4.30113	0.35018		4.30113	3.90428		4.30322	0.50533
4.30447	0.34088		4.30447	4.01473		4.30655	0.49132
4.3078	0.33247		4.3078	4.15212		4.30988	0.47767
4.31113	0.32508		4.31113	4.31812		4.31322	0.46426
4.31447	0.31865		4.31447	4.51422		4.31655	0.45109
4.3178	0.31316		4.3178	4.74191		4.31988	0.43803
4.32113	0.30869		4.32113	5.00238		4.32322	0.42516
4.32447	0.30524		4.32447	5.29671		4.32655	0.41229
4.3278	0.30285		4.3278	5.62572		4.32988	0.39935
4.33113	0.30148		4.33113	5.98985		4.33322	0.38636
4.33447	0.3013		4.33447	6.38926		4.33655	0.37324
4.3378	0.30214		4.3378	6.82378		4.33988	0.35989
4.34113	0.30416		4.34113	7.29281		4.34322	0.3463
4.34447	0.30732		4.34447	7.79545		4.34655	0.33247
4.3478	0.31167		4.3478	8.33035		4.34988	0.31841
4.35113	0.31716		4.35113	8.89575		4.35322	0.30398
4.35447	0.32383		4.35447	9.48948		4.35655	0.28926
4.3578	0.3317		4.3578	10.109		4.35988	0.27424
4.36113	0.3407		4.36113	10.7513		4.36322	0.25886
4.36447	0.35083		4.36447	11.4131		4.36655	0.24331
4.3678	0.36198		4.3678	12.0906		4.36988	0.22745
4.37113	0.37414		4.37113	12.7796		4.37322	0.21136
4.37447	0.38719		4.37447	13.4758		4.37655	0.19515
4.3778	0.40114		4.3778	14.1744		4.37988	0.17881
4.38113	0.41574		4.38113	14.8705		4.38322	0.16242
4.38447	0.431		4.38447	15.5589		4.38655	0.14609
4.3878	0.4468		4.3878	16.2343		4.38988	0.12988
4.39113	0.46307		4.39113	16.8914		4.39322	0.11384
4.39447	0.47958		4.39447	17.5248		4.39655	0.09817
4.3978	0.49633		4.3978	18.1294		4.39988	0.08285
4.40113	0.5132		4.40113	18.6999		4.40322	0.06795
4.40447	0.53		4.40447	19.2316		4.40655	0.05358
4.4078	0.54669		4.4078	19.7198		4.40988	0.03982
4.41113	0.56314		4.41113	20.1604		4.41322	0.02676
4.41447	0.57918		4.41447	20.5498		4.41655	0.01442
4.4178	0.59474		4.4178	20.8848		4.41988	0.00292
4.42113	0.60976		4.42113	21.1628		4.42322	-0.00775
4.42447	0.62424		4.42447	21.382		4.42655	-0.01752
4.4278	0.63807		4.4278	21.5413		4.42988	-0.02629
4.43113	0.65124		4.43113	21.6401		4.43322	-0.03409
4.43447	0.66388		4.43447	21.6786		4.43655	-0.04083
4.4378	0.67598		4.4378	21.6578		4.43988	-0.04655
4.44113	0.68772		4.44113	21.5793		4.44322	-0.05114
4.44447	0.6991		4.44447	21.445		4.44655	-0.05472
4.4478	0.71043		4.4478	21.2578		4.44988	-0.05722
4.45113	0.72181		4.45113	21.0209		4.45322	-0.05859
4.45447	0.73349		4.45447	20.7379		4.45655	-0.05871
4.4578	0.74571		4.4578	20.4127		4.45988	-0.05764
4.46113	0.75883		4.46113	20.0497		4.46322	-0.05519
4.46447	0.77313		4.46447	19.6533		4.46655	-0.05132
4.4678	0.78893		4.4678	19.228		4.46988	-0.04578
4.47113	0.80669		4.47113	18.7784		4.47322	-0.03833
4.47447	0.82666		4.47447	18.3092		4.47655	-0.02879
4.4778	0.84919		4.4778	17.8247		4.47988	-0.01693
4.48113	0.87464		4.48113	17.3293		4.48322	-0.00244
4.48447	0.90331		4.48447	16.8272		4.48655	0.01502
4.4878	0.93544		4.4878	16.3222		4.48988	0.03576
4.49113	0.97108		4.49113	15.8178		4.49322	0.06008
4.49447	1.01048		4.49447	15.3173		4.49655	0.08827
4.4978	1.05357		4.4978	14.8239		4.49988	0.12076
4.50113	1.10048		4.50113	14.34		4.50322	0.15783
4.50447	1.15103		4.50447	13.8681		4.50655	0.19991
4.5078	1.20509		4.5078	13.4106		4.50988	0.24724
4.51113	1.26243		4.51113	12.9691		4.51322	0.30017
4.51447	1.32287		4.51447	12.5454		4.51655	0.359
4.5178	1.38599		4.5178	12.1409		4.51988	0.42397
4.52113	1.45143		4.52113	11.7569		4.52322	0.49531
4.52447	1.51885		4.52447	11.3943		4.52655	0.5731
4.5278	1.58775		4.5278	11.0542		4.52988	0.65744
4.53113	1.65755		4.53113	10.7371		4.53322	0.74834
4.53447	1.72782		4.53447	10.4436		4.53655	0.84561
4.5378	1.79797		4.5378	10.1743		4.53988	0.9492
4.54113	1.86753		4.54113	9.92936		4.54322	1.05882
4.54447	1.93584		4.54447	9.7093		4.54655	1.17421
4.5478	2.00248		4.5478	9.51421		4.54988	1.29491
4.55113	2.06679		4.55113	9.3444		4.55322	1.42062
4.55447	2.12842		4.55447	9.20004		4.55655	1.55073
4.5578	2.18683		4.5578	9.08124		4.55988	1.68473
4.56113	2.24161		4.56113	8.9882		4.56322	1.82194
4.56447	2.29228		4.56447	8.92097		4.56655	1.96177
4.5678	2.33853		4.5678	8.87954		4.56988	2.10339
4.57113	2.38001		4.57113	8.86393		4.57322	2.24602
4.57447	2.41649		4.57447	8.87382		4.57655	2.38878
4.5778	2.44772		4.5778	8.90905		4.57988	2.53087
4.58113	2.47353		4.58113	8.96907		4.58322	2.6713
4.58447	2.49386		4.58447	9.05341		4.58655	2.80917
4.5878	2.5087		4.5878	9.16129		4.58988	2.94352
4.59113	2.51806		4.59113	9.29195		4.59322	3.07339
4.59447	2.52205		4.59447	9.44436		4.59655	3.19797
4.5978	2.52086		4.5978	9.61727		4.59988	3.31628
4.60113	2.51472		4.60113	9.80949		4.60322	3.42745
4.60447	2.50381		4.60447	10.0195		4.60655	3.53074
4.6078	2.48843		4.6078	10.246		4.60988	3.62533
4.61113	2.46894		4.61113	10.487		4.61322	3.71069
4.61447	2.4457		4.61447	10.7409		4.61655	3.78621
4.6178	2.41899		4.6178	11.0059		4.61988	3.85147
4.62113	2.38925		4.62113	11.2801		4.62322	3.90619
4.62447	2.35677		4.62447	11.5615		4.62655	3.95018
4.6278	2.32196		4.6278	11.8481		4.62988	3.9835
4.63113	2.28524		4.63113	12.138		4.63322	4.00627
4.63447	2.24692		4.63447	12.429		4.63655	4.01872
4.6378	2.20734		4.6378	12.7192		4.63988	4.02135
4.64113	2.16687		4.64113	13.0064		4.64322	4.01467
4.64447	2.1258		4.64447	13.2887		4.64655	3.99923
4.6478	2.08437		4.6478	13.564		4.64988	3.97575
4.65113	2.04289		4.65113	13.8302		4.65322	3.94505
4.65447	2.00152		4.65447	14.0853		4.65655	3.90786
4.6578	1.96046		4.6578	14.3275		4.65988	3.86512
4.66113	1.91987		4.66113	14.555		4.66322	3.81762
4.66447	1.87981		4.66447	14.766		4.66655	3.76624
4.6678	1.84047		4.6678	14.9591		4.66988	3.71182
4.67113	1.80185		4.67113	15.1328		4.67322	3.65508
4.67447	1.76394		4.67447	15.2859		4.67655	3.5969
4.6778	1.72681		4.6778	15.4173		4.67988	3.53783
4.68113	1.69039		4.68113	15.5261		4.68322	3.47859
4.68447	1.65468		4.68447	15.6116		4.68655	3.4197
4.6878	1.61976		4.6878	15.6736		4.68988	3.36152
4.69113	1.58548		4.69113	15.7117		4.69322	3.30454
4.69447	1.55187		4.69447	15.7261		4.69655	3.24899
4.6978	1.51891		4.6978	15.717		4.69988	3.19505
4.70113	1.48648		4.70113	15.685		4.70322	3.14289
4.70447	1.45465		4.70447	15.6309		4.70655	3.09265
4.7078	1.42336		4.7078	15.5557		4.70988	3.04425
4.71113	1.39248		4.71113	15.4608		4.71322	2.99776
4.71447	1.36203		4.71447	15.3474		4.71655	2.95305
4.7178	1.33193		4.7178	15.2172		4.71988	2.9102
4.72113	1.30218		4.72113	15.0716		4.72322	2.86895
4.72447	1.27274		4.72447	14.9124		4.72655	2.82931
4.7278	1.24359		4.7278	14.7414		4.72988	2.79105
4.73113	1.21474		4.73113	14.56		4.73322	2.75409
4.73447	1.18625		4.73447	14.3703		4.73655	2.71815
4.7378	1.15812		4.7378	14.1735		4.73988	2.68322
4.74113	1.1304		4.74113	13.9713		4.74322	2.64907
4.74447	1.1031		4.74447	13.765		4.74655	2.61557
4.7478	1.07622		4.7478	13.5559		4.74988	2.58255
4.75113	1.04988		4.75113	13.3451		4.75322	2.54989
4.75447	1.02395		4.75447	13.1335		4.75655	2.51752
4.7578	0.99862		4.7578	12.922		4.75988	2.48533
4.76113	0.97376		4.76113	12.7112		4.76322	2.45327
4.76447	0.9495		4.76447	12.5016		4.76655	2.42132
4.7678	0.92578		4.7678	12.2935		4.76988	2.38937
4.77113	0.90271		4.77113	12.0872		4.77322	2.35736
4.77447	0.88018		4.77447	11.8827		4.77655	2.32536
4.7778	0.85837		4.7778	11.6801		4.77988	2.29323
4.78113	0.83721		4.78113	11.4791		4.78322	2.26098
4.78447	0.81676		4.78447	11.2798		4.78655	2.22856
4.7878	0.79697		4.7878	11.0817		4.78988	2.19595
4.79113	0.7779		4.79113	10.8847		4.79322	2.16299
4.79447	0.75948		4.79447	10.6885		4.79655	2.12979
4.7978	0.74172		4.7978	10.4929		4.79988	2.09612
4.80113	0.72461		4.80113	10.2975		4.80322	2.06196
4.80447	0.70822		4.80447	10.1021		4.80655	2.02721
4.8078	0.69249		4.8078	9.90647		4.80988	1.99187
4.81113	0.67735		4.81113	9.71049		4.81322	1.95581
4.81447	0.66292		4.81447	9.51397		4.81655	1.91891
4.8178	0.64915		4.8178	9.31692		4.81988	1.88112
4.82113	0.6361		4.82113	9.11927		4.82322	1.84238
4.82447	0.62376		4.82447	8.92109		4.82655	1.80274
4.8278	0.61202		4.8278	8.72254		4.82988	1.76209
4.83113	0.60099		4.83113	8.52382		4.83322	1.72043
4.83447	0.59062		4.83447	8.32528		4.83655	1.67787
4.8378	0.58085		4.8378	8.12715		4.83988	1.63442
4.84113	0.57173		4.84113	7.92992		4.84322	1.59013
4.84447	0.5632		4.84447	7.73394		4.84655	1.54513
4.8478	0.55522		4.8478	7.53975		4.84988	1.49941
4.85113	0.54783		4.85113	7.34782		4.85322	1.45316
4.85447	0.54103		4.85447	7.1587		4.85655	1.40643
4.8578	0.53483		4.8578	6.97297		4.85988	1.3594
4.86113	0.52911		4.86113	6.79117		4.86322	1.31208
4.86447	0.52392		4.86447	6.61391		4.86655	1.26457
4.8678	0.51928		4.8678	6.44165		4.86988	1.21701
4.87113	0.5151		4.87113	6.275		4.87322	1.16956
4.87447	0.51147		4.87447	6.11448		4.87655	1.12242
4.8778	0.50819		4.8778	5.96058		4.87988	1.07563
4.88113	0.50539		4.88113	5.81366		4.88322	1.02937
4.88447	0.50294		4.88447	5.67424		4.88655	0.98389
4.8878	0.50092		4.8878	5.54252		4.88988	0.93925
4.89113	0.49925		4.89113	5.41884		4.89322	0.89568
4.89447	0.49794		4.89447	5.30344		4.89655	0.85318
4.8978	0.49704		4.8978	5.19645		4.89988	0.81193
4.90113	0.49657		4.90113	5.09799		4.90322	0.772
4.90447	0.49645		4.90447	5.00804		4.90655	0.73338
4.9078	0.49675		4.9078	4.92668		4.90988	0.69624
4.91113	0.4974		4.91113	4.85373		4.91322	0.66054
4.91447	0.49847		4.91447	4.78911		4.91655	0.62633
4.9178	0.4999		4.9178	4.73261		4.91988	0.59366
4.92113	0.50181		4.92113	4.68397		4.92322	0.56249
4.92447	0.50402		4.92447	4.6429		4.92655	0.53281
4.9278	0.50664		4.9278	4.60905		4.92988	0.50467
4.93113	0.50962		4.93113	4.58205		4.93322	0.47803
4.93447	0.51296		4.93447	4.56142		4.93655	0.45276
4.9378	0.51659		4.9378	4.54688		4.93988	0.42886
4.94113	0.52047		4.94113	4.53776		4.94322	0.40627
4.94447	0.52458		4.94447	4.53371		4.94655	0.38481
4.9478	0.52887		4.9478	4.53418		4.94988	0.3646
4.95113	0.53328		4.95113	4.53866		4.95322	0.34541
4.95447	0.53781		4.95447	4.54658		4.95655	0.32729
4.9578	0.54246		4.9578	4.55731		4.95988	0.31012
4.96113	0.54723		4.96113	4.57036		4.96322	0.29391
4.96447	0.55218		4.96447	4.58509		4.96655	0.27853
4.9678	0.5573		4.9678	4.601		4.96988	0.26399
4.97113	0.56267		4.97113	4.61745		4.97322	0.25028
4.97447	0.56827		4.97447	4.63396		4.97655	0.23729
4.9778	0.57423		4.9778	4.64988		4.97988	0.22507
4.98113	0.58055		4.98113	4.66484		4.98322	0.2135
4.98447	0.58728		4.98447	4.67825		4.98655	0.2026
4.9878	0.59438		4.9878	4.68969		4.98988	0.1924
4.99113	0.60195		4.99113	4.69881		4.99322	0.18293
4.99447	0.60999		4.99447	4.70525		4.99655	0.17411
4.9978	0.61846		4.9978	4.70871		4.99988	0.16618
5.00113	0.6274		5.00113	4.70889		5.00322	0.15897
5.00447	0.63688		5.00447	4.70567		5.00655	0.15265
5.0078	0.64689		5.0078	4.69887		5.00988	0.14728
5.01113	0.6575		5.01113	4.68856		5.01322	0.14287
5.01447	0.6687		5.01447	4.67461		5.01655	0.13942
5.0178	0.68057		5.0178	4.65727		5.01988	0.13715
5.02113	0.69308		5.02113	4.6367		5.02322	0.13602
5.02447	0.70632		5.02447	4.61322		5.02655	0.13614
5.0278	0.72014		5.0278	4.58717		5.02988	0.13757
5.03113	0.73469		5.03113	4.5591		5.03322	0.14055
5.03447	0.74983		5.03447	4.52954		5.03655	0.14502
5.0378	0.7655		5.0378	4.4992		5.03988	0.15122
5.04113	0.78166		5.04113	4.4688		5.04322	0.1592
5.04447	0.79829		5.04447	4.43918		5.04655	0.16904
5.0478	0.81521		5.0478	4.41122		5.04988	0.18084
5.05113	0.83238		5.05113	4.38595		5.05322	0.19461
5.05447	0.84972		5.05447	4.36425		5.05655	0.2104
5.0578	0.86707		5.0578	4.34732		5.05988	0.22829
5.06113	0.88447		5.06113	4.33624		5.06322	0.24819
5.06447	0.9017		5.06447	4.33218		5.06655	0.27019
5.0678	0.91875		5.0678	4.33642		5.06988	0.29409
5.07113	0.93549		5.07113	4.35007		5.07322	0.31996
5.07447	0.95189		5.07447	4.37438		5.07655	0.34767
5.0778	0.96786		5.0778	4.41068		5.07988	0.37712
5.08113	0.98336		5.08113	4.46016		5.08322	0.40823
5.08447	0.99826		5.08447	4.52387		5.08655	0.44078
5.0878	1.01256		5.0878	4.60297		5.08988	0.47469
5.09113	1.02621		5.09113	4.6984		5.09322	0.50974
5.09447	1.03903		5.09447	4.81105		5.09655	0.5458
5.0978	1.05107		5.0978	4.9417		5.09988	0.5827
5.10113	1.06221		5.10113	5.09101		5.10322	0.62019
5.10447	1.07247		5.10447	5.25951		5.10655	0.65809
5.1078	1.08171		5.1078	5.44757		5.10988	0.69618
5.11113	1.08993		5.11113	5.65541		5.11322	0.73421
5.11447	1.09708		5.11447	5.88316		5.11655	0.77194
5.1178	1.10322		5.1178	6.1307		5.11988	0.80913
5.12113	1.10817		5.12113	6.39778		5.12322	0.84555
5.12447	1.11204		5.12447	6.68401		5.12655	0.88084
5.1278	1.11485		5.1278	6.9887		5.12988	0.91475
5.13113	1.11657		5.13113	7.31117		5.13322	0.94712
5.13447	1.11717		5.13447	7.65026		5.13655	0.97758
5.1378	1.11675		5.1378	8.00496		5.13988	1.00589
5.14113	1.1152		5.14113	8.37392		5.14322	1.03188
5.14447	1.11264		5.14447	8.75568		5.14655	1.0553
5.1478	1.109		5.1478	9.14872		5.14988	1.07592
5.15113	1.10441		5.15113	9.55123		5.15322	1.09351
5.15447	1.09887		5.15447	9.96149		5.15655	1.10799
5.1578	1.09237		5.1578	10.3775		5.15988	1.11908
5.16113	1.0851		5.16113	10.7974		5.16322	1.12671
5.16447	1.07706		5.16447	11.2188		5.16655	1.13076
5.1678	1.06829		5.1678	11.6398		5.16988	1.13124
5.17113	1.05888		5.17113	12.0578		5.17322	1.12802
5.17447	1.04892		5.17447	12.4707		5.17655	1.12122
5.1778	1.03843		5.1778	12.8759		5.17988	1.11085
5.18113	1.02752		5.18113	13.2711		5.18322	1.09708
5.18447	1.01614		5.18447	13.6539		5.18655	1.07998
5.1878	1.0044		5.1878	14.0219		5.18988	1.05977
5.19113	0.99224		5.19113	14.3727		5.19322	1.0367
5.19447	0.97978		5.19447	14.7039		5.19655	1.01089
5.1978	0.96703		5.1978	15.0134		5.19988	0.9827
5.20113	0.95391		5.20113	15.299		5.20322	0.95242
5.20447	0.94056		5.20447	15.5587		5.20655	0.92024
5.2078	0.92697		5.2078	15.7908		5.20988	0.88644
5.21113	0.9132		5.21113	15.9934		5.21322	0.85139
5.21447	0.8992		5.21447	16.1651		5.21655	0.81527
5.2178	0.88513		5.2178	16.3047		5.21988	0.77838
5.22113	0.87094		5.22113	16.4115		5.22322	0.74095
5.22447	0.8567		5.22447	16.4846		5.22655	0.70322
5.2278	0.84245		5.2278	16.5237		5.22988	0.66537
5.23113	0.82827		5.23113	16.5289		5.23322	0.62764
5.23447	0.8142		5.23447	16.5005		5.23655	0.59021
5.2378	0.80019		5.2378	16.4391		5.23988	0.55313
5.24113	0.78636		5.24113	16.3455		5.24322	0.51665
5.24447	0.77271		5.24447	16.2209		5.24655	0.48089
5.2478	0.75924		5.2478	16.0667		5.24988	0.44584
5.25113	0.74595		5.25113	15.8846		5.25322	0.41163
5.25447	0.7329		5.25447	15.6764		5.25655	0.37837
5.2578	0.72014		5.2578	15.444		5.25988	0.34606
5.26113	0.70763		5.26113	15.1896		5.26322	0.31471
5.26447	0.69547		5.26447	14.9154		5.26655	0.28443
5.2678	0.68361		5.2678	14.6236		5.26988	0.25523
5.27113	0.6721		5.27113	14.3168		5.27322	0.22703
5.27447	0.66102		5.27447	13.9971		5.27655	0.19997
5.2778	0.65035		5.2778	13.6669		5.27988	0.17399
5.28113	0.64003		5.28113	13.3283		5.28322	0.14913
5.28447	0.6302		5.28447	12.9835		5.28655	0.12535
5.2878	0.62084		5.2878	12.6345		5.28988	0.10276
5.29113	0.61184		5.29113	12.2831		5.29322	0.08124
5.29447	0.60338		5.29447	11.9311		5.29655	0.06086
5.2978	0.59533		5.2978	11.5802		5.29988	0.04154
5.30113	0.5877		5.30113	11.2316		5.30322	0.02342
5.30447	0.58055		5.30447	10.8867		5.30655	0.00632
5.3078	0.57381		5.3078	10.5467		5.30988	-0.00966
5.31113	0.5675		5.31113	10.2125		5.31322	-0.02462
5.31447	0.56165		5.31447	9.88513		5.31655	-0.03856
5.3178	0.55623		5.3178	9.56506		5.31988	-0.0515
5.32113	0.55128		5.32113	9.25291		5.32322	-0.06342
5.32447	0.54675		5.32447	8.94916		5.32655	-0.07445
5.3278	0.54276		5.3278	8.65406		5.32988	-0.0844
5.33113	0.53924		5.33113	8.36796		5.33322	-0.09346
5.33447	0.5362		5.33447	8.09085		5.33655	-0.10145
5.3378	0.5337		5.3378	7.82299		5.33988	-0.10848
5.34113	0.53173		5.34113	7.56431		5.34322	-0.1145
5.34447	0.5303		5.34447	7.31492		5.34655	-0.11957
5.3478	0.52935		5.3478	7.07483		5.34988	-0.1235
5.35113	0.52899		5.35113	6.84404		5.35322	-0.12642
5.35447	0.52923		5.35447	6.62249		5.35655	-0.12827
5.3578	0.53		5.3578	6.41012		5.35988	-0.12892
5.36113	0.53138		5.36113	6.20699		5.36322	-0.12833
5.36447	0.5334		5.36447	6.01292		5.36655	-0.12642
5.3678	0.53608		5.3678	5.8279		5.36988	-0.12308
5.37113	0.53942		5.37113	5.65201		5.37322	-0.11814
5.37447	0.54348		5.37447	5.4853		5.37655	-0.11146
5.3778	0.5483		5.3778	5.3277		5.37988	-0.103
5.38113	0.55391		5.38113	5.17935		5.38322	-0.09245
5.38447	0.5604		5.38447	5.04047		5.38655	-0.07975
5.3878	0.56773		5.3878	4.91112		5.38988	-0.06473
5.39113	0.57602		5.39113	4.79162		5.39322	-0.04715
5.39447	0.58526		5.39447	4.68212		5.39655	-0.02676
5.3978	0.59545		5.3978	4.58282		5.39988	-0.00346
5.40113	0.60672		5.40113	4.49407		5.40322	0.02307
5.40447	0.61899		5.40447	4.41605		5.40655	0.05305
5.4078	0.63229		5.4078	4.34911		5.40988	0.08661
5.41113	0.64659		5.41113	4.29338		5.41322	0.12416
5.41447	0.66191		5.41447	4.24927		5.41655	0.16582
5.4178	0.67824		5.4178	4.21697		5.41988	0.21189
5.42113	0.69553		5.42113	4.1967		5.42322	0.26256
5.42447	0.71377		5.42447	4.1886		5.42655	0.31805
5.4278	0.73296		5.4278	4.19283		5.42988	0.37855
5.43113	0.75299		5.43113	4.20946		5.43322	0.44417
5.43447	0.77379		5.43447	4.23861		5.43655	0.51516
5.4378	0.7953		5.4378	4.28027		5.43988	0.59158
5.44113	0.81754		5.44113	4.33439		5.44322	0.67341
5.44447	0.84031		5.44447	4.40079		5.44655	0.76085
5.4478	0.86367		5.4478	4.47947		5.44988	0.85378
5.45113	0.88745		5.45113	4.57007		5.45322	0.95224
5.45447	0.91153		5.45447	4.67235		5.45655	1.05613
5.4578	0.93585		5.4578	4.78601		5.45988	1.16533
5.46113	0.96029		5.46113	4.91059		5.46322	1.27971
5.46447	0.98479		5.46447	5.04565		5.46655	1.3991
5.4678	1.00917		5.4678	5.19061		5.46988	1.52326
5.47113	1.03343		5.47113	5.34487		5.47322	1.65194
5.47447	1.05733		5.47447	5.50777		5.47655	1.7848
5.4778	1.08081		5.4778	5.67871		5.47988	1.92165
5.48113	1.10388		5.48113	5.85693		5.48322	2.06208
5.48447	1.12641		5.48447	6.04165		5.48655	2.20573
5.4878	1.14828		5.4878	6.23226		5.48988	2.35224
5.49113	1.1695		5.49113	6.42788		5.49322	2.50119
5.49447	1.19001		5.49447	6.62762		5.49655	2.65205
5.4978	1.20962		5.4978	6.83075		5.49988	2.80446
5.50113	1.22833		5.50113	7.03627		5.50322	2.95782
5.50447	1.24604		5.50447	7.24316		5.50655	3.11166
5.5078	1.26255		5.5078	7.45046		5.50988	3.26544
5.51113	1.27786		5.51113	7.65705		5.51322	3.41851
5.51447	1.29175		5.51447	7.86191		5.51655	3.57026
5.5178	1.30421		5.5178	8.06385		5.51988	3.72005
5.52113	1.31506		5.52113	8.26168		5.52322	3.86721
5.52447	1.32436		5.52447	8.45438		5.52655	4.01109
5.5278	1.33204		5.5278	8.64077		5.52988	4.15099
5.53113	1.33812		5.53113	8.81976		5.53322	4.28623
5.53447	1.34265		5.53447	8.99023		5.53655	4.41617
5.5378	1.34569		5.5378	9.15122		5.53988	4.54009
5.54113	1.34724		5.54113	9.30178		5.54322	4.65733
5.54447	1.34748		5.54447	9.44096		5.54655	4.76736
5.5478	1.34641		5.5478	9.56792		5.54988	4.86952
5.55113	1.34403		5.55113	9.68188		5.55322	4.96322
5.55447	1.34051		5.55447	9.78225		5.55655	5.0481
5.5578	1.3358		5.5578	9.86838		5.55988	5.12356
5.56113	1.33008		5.56113	9.93979		5.56322	5.18924
5.56447	1.32328		5.56447	9.99618		5.56655	5.24485
5.5678	1.31553		5.5678	10.0373		5.56988	5.29021
5.57113	1.30689		5.57113	10.063		5.57322	5.32502
5.57447	1.29741		5.57447	10.0733		5.57655	5.34934
5.5778	1.2871		5.5778	10.0683		5.57988	5.36317
5.58113	1.27602		5.58113	10.0483		5.58322	5.3665
5.58447	1.26421		5.58447	10.0135		5.58655	5.35959
5.5878	1.25176		5.5878	9.96435		5.58988	5.34266
5.59113	1.2387		5.59113	9.90152		5.59322	5.31608
5.59447	1.22505		5.59447	9.82553		5.59655	5.28014
5.5978	1.21099		5.5978	9.73713		5.59988	5.23525
5.60113	1.19662		5.60113	9.637		5.60322	5.18191
5.60447	1.1819		5.60447	9.52595		5.60655	5.12058
5.6078	1.16706		5.6078	9.4049		5.60988	5.05179
5.61113	1.15216		5.61113	9.2746		5.61322	4.97609
5.61447	1.1372		5.61447	9.1359		5.61655	4.89408
5.6178	1.1223		5.6178	8.98981		5.61988	4.80628
5.62113	1.10745		5.62113	8.83704		5.62322	4.71342
5.62447	1.09267		5.62447	8.67856		5.62655	4.61596
5.6278	1.07795		5.6278	8.51518		5.62988	4.51452
5.63113	1.06335		5.63113	8.34757		5.63322	4.40973
5.63447	1.0488		5.63447	8.17662		5.63655	4.30214
5.6378	1.03438		5.6378	8.00306		5.63988	4.19223
5.64113	1.02007		5.64113	7.82746		5.64322	4.08053
5.64447	1.00589		5.64447	7.65049		5.64655	3.96752
5.6478	0.99182		5.6478	7.47287		5.64988	3.85356
5.65113	0.97799		5.65113	7.29501		5.65322	3.73906
5.65447	0.9644		5.65447	7.11745		5.65655	3.62438
5.6578	0.95111		5.6578	6.94072		5.65988	3.50988
5.66113	0.93806		5.66113	6.76513		5.66322	3.39586
5.66447	0.9253		5.66447	6.59114		5.66655	3.28249
5.6678	0.91285		5.6678	6.41894		5.66988	3.17007
5.67113	0.90063		5.67113	6.24883		5.67322	3.05879
5.67447	0.88876		5.67447	6.08104		5.67655	2.94888
5.6778	0.87714		5.6778	5.9157		5.67988	2.84046
5.68113	0.86576		5.68113	5.75304		5.68322	2.73371
5.68447	0.85473		5.68447	5.59306		5.68655	2.62874
5.6878	0.84394		5.6878	5.43594		5.68988	2.52563
5.69113	0.83339		5.69113	5.28181		5.69322	2.42442
5.69447	0.82308		5.69447	5.13071		5.69655	2.32524
5.6978	0.81301		5.6978	4.98271		5.69988	2.22808
5.70113	0.80317		5.70113	4.83793		5.70322	2.13295
5.70447	0.79358		5.70447	4.69631		5.70655	2.03985
5.7078	0.7841		5.7078	4.55797		5.70988	1.94877
5.71113	0.77486		5.71113	4.42284		5.71322	1.85978
5.71447	0.7658		5.71447	4.29094		5.71655	1.77282
5.7178	0.75698		5.7178	4.16219		5.71988	1.68788
5.72113	0.7484		5.72113	4.03666		5.72322	1.60497
5.72447	0.74017		5.72447	3.91436		5.72655	1.52403
5.7278	0.73224		5.7278	3.79515		5.72988	1.44517
5.73113	0.72479		5.73113	3.6791		5.73322	1.36834
5.73447	0.71776		5.73447	3.56621		5.73655	1.29348
5.7378	0.71126		5.7378	3.45647		5.73988	1.22064
5.74113	0.7053		5.74113	3.3499		5.74322	1.14983
5.74447	0.7		5.74447	3.24655		5.74655	1.08093
5.7478	0.69523		5.7478	3.14635		5.74988	1.01399
5.75113	0.69124		5.75113	3.04937		5.75322	0.94903
5.75447	0.68784		5.75447	2.95562		5.75655	0.88596
5.7578	0.68521		5.7578	2.86514		5.75988	0.82481
5.76113	0.68331		5.76113	2.77781		5.76322	0.7655
5.76447	0.68218		5.76447	2.69383		5.76655	0.70798
5.7678	0.68182		5.7678	2.61307		5.76988	0.65231
5.77113	0.68229		5.77113	2.53558		5.77322	0.59837
5.77447	0.68361		5.77447	2.46137		5.77655	0.54616
5.7778	0.68581		5.7778	2.39044		5.77988	0.49573
5.78113	0.68891		5.78113	2.32273		5.78322	0.44703
5.78447	0.6929		5.78447	2.25824		5.78655	0.40013
5.7878	0.69791		5.7878	2.19697		5.78988	0.35495
5.79113	0.70381		5.79113	2.13879		5.79322	0.31155
5.79447	0.71067		5.79447	2.08378		5.79655	0.26995
5.7978	0.71847		5.7978	2.03186		5.79988	0.23013
5.80113	0.72724		5.80113	1.98299		5.80322	0.19211
5.80447	0.73677		5.80447	1.93709		5.80655	0.15575
5.8078	0.7472		5.8078	1.89424		5.80988	0.12106
5.81113	0.75841		5.81113	1.8543		5.81322	0.08792
5.81447	0.77027		5.81447	1.81723		5.81655	0.05627
5.8178	0.78285		5.8178	1.78295		5.81988	0.02599
5.82113	0.79596		5.82113	1.75142		5.82322	-0.00286
5.82447	0.80955		5.82447	1.72257		5.82655	-0.03046
5.8278	0.82362		5.8278	1.69635		5.82988	-0.05674
5.83113	0.83804		5.83113	1.67263		5.83322	-0.08172
5.83447	0.85276		5.83447	1.65129		5.83655	-0.10544
5.8378	0.86772		5.8378	1.63221		5.83988	-0.12779
5.84113	0.8828		5.84113	1.61529		5.84322	-0.14883
5.84447	0.89794		5.84447	1.60044		5.84655	-0.16856
5.8478	0.91308		5.8478	1.58751		5.84988	-0.18692
5.85113	0.92816		5.85113	1.57648		5.85322	-0.20397
5.85447	0.94312		5.85447	1.56713		5.85655	-0.2197
5.8578	0.95785		5.8578	1.55938		5.85988	-0.23419
5.86113	0.97233		5.86113	1.55318		5.86322	-0.24742
5.86447	0.98646		5.86447	1.54841		5.86655	-0.25946
5.8678	1.00023		5.8678	1.54501		5.86988	-0.27031
5.87113	1.01358		5.87113	1.54281		5.87322	-0.27996
5.87447	1.02651		5.87447	1.54173		5.87655	-0.28849
5.8778	1.03897		5.8778	1.54173		5.87988	-0.29582
5.88113	1.05089		5.88113	1.54257		5.88322	-0.30202
5.88447	1.06221		5.88447	1.54418		5.88655	-0.30714
5.8878	1.07288		5.8878	1.54644		5.88988	-0.31114
5.89113	1.08284		5.89113	1.54924		5.89322	-0.31418
5.89447	1.09196		5.89447	1.55246		5.89655	-0.3162
5.8978	1.10024		5.8978	1.55592		5.89988	-0.31739
5.90113	1.10763		5.90113	1.55956		5.90322	-0.31769
5.90447	1.11407		5.90447	1.56331		5.90655	-0.31722
5.9078	1.11955		5.9078	1.56707		5.90988	-0.31602
5.91113	1.12408		5.91113	1.57076		5.91322	-0.31412
5.91447	1.12766		5.91447	1.5744		5.91655	-0.31155
5.9178	1.13034		5.9178	1.57791		5.91988	-0.30828
5.92113	1.13225		5.92113	1.58119		5.92322	-0.30446
5.92447	1.13332		5.92447	1.58429		5.92655	-0.29999
5.9278	1.13362		5.9278	1.58709		5.92988	-0.29498
5.93113	1.13314		5.93113	1.58954		5.93322	-0.28938
5.93447	1.13189		5.93447	1.59162		5.93655	-0.28336
5.9378	1.12993		5.9378	1.59329		5.93988	-0.27686
5.94113	1.12724		5.94113	1.59448		5.94322	-0.27001
5.94447	1.12379		5.94447	1.5952		5.94655	-0.26286
5.9478	1.11961		5.9478	1.59526		5.94988	-0.25541
5.95113	1.11479		5.95113	1.59478		5.95322	-0.24766
5.95447	1.1093		5.95447	1.59359		5.95655	-0.23973
5.9578	1.10322		5.9578	1.5918		5.95988	-0.23162
5.96113	1.09661		5.96113	1.58936		5.96322	-0.22334
5.96447	1.08945		5.96447	1.58626		5.96655	-0.21487
5.9678	1.08182		5.9678	1.58256		5.96988	-0.20629
5.97113	1.07378		5.97113	1.57821		5.97322	-0.19771
5.97447	1.06531		5.97447	1.57338		5.97655	-0.18907
5.9778	1.05643		5.9778	1.56808		5.97988	-0.18048
5.98113	1.04713		5.98113	1.56236		5.98322	-0.17202
5.98447	1.03748		5.98447	1.55628		5.98655	-0.16385
5.9878	1.02752		5.9878	1.54996		5.98988	-0.15599
5.99113	1.01721		5.99113	1.54334		5.99322	-0.14859
5.99447	1.00672		5.99447	1.53661		5.99655	-0.14162
5.9978	0.99593		5.9978	1.52975		5.99988	-0.13518
6.00113	0.98503		6.00113	1.52284		6.00322	-0.12922
6.00447	0.974		6.00447	1.51598		6.00655	-0.12386
6.0078	0.96285		6.0078	1.50919		6.00988	-0.11909
6.01113	0.95165		6.01113	1.50257		6.01322	-0.11486
6.01447	0.94038		6.01447	1.4962		6.01655	-0.11128
6.0178	0.92912		6.0178	1.49006		6.01988	-0.10824
6.02113	0.91779		6.02113	1.48439		6.02322	-0.1058
6.02447	0.90647		6.02447	1.47915		6.02655	-0.10407
6.0278	0.89514		6.0278	1.4745		6.02988	-0.10294
6.03113	0.8837		6.03113	1.47045		6.03322	-0.10252
6.03447	0.87225		6.03447	1.46705		6.03655	-0.10282
6.0378	0.86075		6.0378	1.46449		6.03988	-0.10371
6.04113	0.84925		6.04113	1.4627		6.04322	-0.1052
6.04447	0.83774		6.04447	1.46192		6.04655	-0.10729
6.0478	0.8263		6.0478	1.4621		6.04988	-0.10997
6.05113	0.81491		6.05113	1.46335		6.05322	-0.11313
6.05447	0.80365		6.05447	1.4658		6.05655	-0.11671
6.0578	0.79244		6.0578	1.46943		6.05988	-0.12076
6.06113	0.78148		6.06113	1.47432		6.06322	-0.12511
6.06447	0.77063		6.06447	1.48064		6.06655	-0.12982
6.0678	0.7599		6.0678	1.48839		6.06988	-0.13489
6.07113	0.74935		6.07113	1.49775		6.07322	-0.14019
6.07447	0.73898		6.07447	1.50871		6.07655	-0.14579
6.0778	0.72867		6.0778	1.52153		6.07988	-0.15169
6.08113	0.71853		6.08113	1.53625		6.08322	-0.15783
6.08447	0.70852		6.08447	1.55324		6.08655	-0.16421
6.0878	0.69857		6.0878	1.57273		6.08988	-0.17077
6.09113	0.68873		6.09113	1.59496		6.09322	-0.17756
6.09447	0.67902		6.09447	1.62035		6.09655	-0.18448
6.0978	0.66942		6.0978	1.64932		6.09988	-0.19151
6.10113	0.65994		6.10113	1.68246		6.10322	-0.1986
6.10447	0.65058		6.10447	1.72031		6.10655	-0.20564
6.1078	0.64135		6.1078	1.76358		6.10988	-0.21267
6.11113	0.63223		6.11113	1.81317		6.11322	-0.21952
6.11447	0.62323		6.11447	1.86998		6.11655	-0.22626
6.1178	0.61435		6.1178	1.93524		6.11988	-0.23276
6.12113	0.60564		6.12113	2.01023		6.12322	-0.23913
6.12447	0.59712		6.12447	2.09659		6.12655	-0.24527
6.1278	0.58883		6.1278	2.19607		6.12988	-0.25117
6.13113	0.58079		6.13113	2.31069		6.13322	-0.2569
6.13447	0.57304		6.13447	2.44284		6.13655	-0.2625
6.1378	0.56553		6.1378	2.59495		6.13988	-0.26798
6.14113	0.55826		6.14113	2.76983		6.14322	-0.27335
6.14447	0.55128		6.14447	2.97058		6.14655	-0.27859
6.1478	0.54461		6.1478	3.20041		6.14988	-0.28378
6.15113	0.53817		6.15113	3.46285		6.15322	-0.28896
6.15447	0.53197		6.15447	3.76171		6.15655	-0.29403
6.1578	0.52607		6.1578	4.10092		6.15988	-0.2991
6.16113	0.52047		6.16113	4.48447		6.16322	-0.3041
6.16447	0.51522		6.16447	4.91673		6.16655	-0.30911
6.1678	0.51033		6.1678	5.40197		6.16988	-0.314
6.17113	0.50592		6.17113	5.94449		6.17322	-0.31877
6.17447	0.50193		6.17447	6.54876		6.17655	-0.32347
6.1778	0.49847		6.1778	7.2189		6.17988	-0.32812
6.18113	0.49555		6.18113	7.95907		6.18322	-0.33259
6.18447	0.49317		6.18447	8.77315		6.18655	-0.337
6.1878	0.49138		6.1878	9.66471		6.18988	-0.34136
6.19113	0.49019		6.19113	10.6369		6.19322	-0.34553
6.19447	0.48953		6.19447	11.6925		6.19655	-0.34964
6.1978	0.48947		6.1978	12.8338		6.19988	-0.35369
6.20113	0.49001		6.20113	14.0626		6.20322	-0.35763
6.20447	0.49114		6.20447	15.3798		6.20655	-0.36156
6.2078	0.49287		6.2078	16.7861		6.20988	-0.36544
6.21113	0.49525		6.21113	18.2813		6.21322	-0.36925
6.21447	0.49829		6.21447	19.8647		6.21655	-0.37301
6.2178	0.50187		6.2178	21.535		6.21988	-0.37682
6.22113	0.50604		6.22113	23.2905		6.22322	-0.38058
6.22447	0.51081		6.22447	25.129		6.22655	-0.38433
6.2278	0.51606		6.2278	27.0475		6.22988	-0.38815
6.23113	0.5219		6.23113	29.0431		6.23322	-0.39196
6.23447	0.52816		6.23447	31.1122		6.23655	-0.39583
6.2378	0.53495		6.2378	33.2509		6.23988	-0.39971
6.24113	0.5421		6.24113	35.4549		6.24322	-0.4037
6.24447	0.54973		6.24447	37.7197		6.24655	-0.40776
6.2478	0.55772		6.2478	40.0406		6.24988	-0.41175
6.25113	0.56607		6.25113	42.4123		6.25322	-0.4158
6.25447	0.57471		6.25447	44.8298		6.25655	-0.41986
6.2578	0.58365		6.2578	47.2875		6.25988	-0.42391
6.26113	0.59277		6.26113	49.7799		6.26322	-0.4279
6.26447	0.60213		6.26447	52.301		6.26655	-0.43184
6.2678	0.6116		6.2678	54.8447		6.26988	-0.43571
6.27113	0.62114		6.27113	57.4045		6.27322	-0.43958
6.27447	0.63068		6.27447	59.9735		6.27655	-0.44334
6.2778	0.64021		6.2778	62.5445		6.27988	-0.44709
6.28113	0.64969		6.28113	65.1096		6.28322	-0.45079
6.28447	0.65899		6.28447	67.6607		6.28655	-0.45449
6.2878	0.66817		6.2878	70.1892		6.28988	-0.45812
6.29113	0.67705		6.29113	72.686		6.29322	-0.4617
6.29447	0.68569		6.29447	75.1418		6.29655	-0.46521
6.2978	0.69404		6.2978	77.5469		6.29988	-0.46867
6.30113	0.70208		6.30113	79.8916		6.30322	-0.47213
6.30447	0.70971		6.30447	82.1656		6.30655	-0.47553
6.3078	0.71698		6.3078	84.3589		6.30988	-0.47892
6.31113	0.72378		6.31113	86.4613		6.31322	-0.4822
6.31447	0.7301		6.31447	88.4626		6.31655	-0.48542
6.3178	0.73588		6.3178	90.353		6.31988	-0.48858
6.32113	0.74112		6.32113	92.1228		6.32322	-0.49168
6.32447	0.74583		6.32447	93.7632		6.32655	-0.49466
6.3278	0.74995		6.3278	95.2656		6.32988	-0.49746
6.33113	0.7534		6.33113	96.6226		6.33322	-0.5002
6.33447	0.75626		6.33447	97.8277		6.33655	-0.50282
6.3378	0.75853		6.3378	98.8752		6.33988	-0.50533
6.34113	0.76014		6.34113	99.7606		6.34322	-0.50771
6.34447	0.76121		6.34447	100.481		6.34655	-0.50998
6.3478	0.76157		6.3478	101.034		6.34988	-0.51218
6.35113	0.76139		6.35113	101.418		6.35322	-0.51421
6.35447	0.76061		6.35447	101.634		6.35655	-0.51612
6.3578	0.75918		6.3578	101.683		6.35988	-0.51785
6.36113	0.75716		6.36113	101.568		6.36322	-0.51945
6.36447	0.75459		6.36447	101.291		6.36655	-0.52083
6.3678	0.7515		6.3678	100.857		6.36988	-0.52196
6.37113	0.74786		6.37113	100.271		6.37322	-0.52291
6.37447	0.74369		6.37447	99.5398		6.37655	-0.52369
6.3778	0.73916		6.3778	98.67		6.37988	-0.52422
6.38113	0.73415		6.38113	97.6691		6.38322	-0.52464
6.38447	0.72885		6.38447	96.5453		6.38655	-0.52488
6.3878	0.72318		6.3878	95.3069		6.38988	-0.52506
6.39113	0.71716		6.39113	93.9629		6.39322	-0.52518
6.39447	0.71084		6.39447	92.5221		6.39655	-0.52524
6.3978	0.70429		6.3978	90.9938		6.39988	-0.52524
6.40113	0.69749		6.40113	89.3868		6.40322	-0.52524
6.40447	0.6904		6.40447	87.7105		6.40655	-0.52524
6.4078	0.68313		6.4078	85.9736		6.40988	-0.52524
6.41113	0.67562		6.41113	84.185		6.41322	-0.52512
6.41447	0.66787		6.41447	82.3532		6.41655	-0.52494
6.4178	0.66		6.4178	80.4865		6.41988	-0.52464
6.42113	0.65202		6.42113	78.593		6.42322	-0.52428
6.42447	0.64391		6.42447	76.6799		6.42655	-0.52381
6.4278	0.63574		6.4278	74.7545		6.42988	-0.52321
6.43113	0.62758		6.43113	72.8232		6.43322	-0.52255
6.43447	0.61935		6.43447	70.8922		6.43655	-0.52184
6.4378	0.61125		6.4378	68.9669		6.43988	-0.521
6.44113	0.60308		6.44113	67.0523		6.44322	-0.52017
6.44447	0.59509		6.44447	65.1528		6.44655	-0.51928
6.4478	0.58711		6.4478	63.2725		6.44988	-0.51838
6.45113	0.57924		6.45113	61.415		6.45322	-0.51749
6.45447	0.57143		6.45447	59.5835		6.45655	-0.51659
6.4578	0.56374		6.4578	57.7807		6.45988	-0.5157
6.46113	0.55617		6.46113	56.0091		6.46322	-0.51481
6.46447	0.54872		6.46447	54.2705		6.46655	-0.51397
6.4678	0.54145		6.4678	52.5665		6.46988	-0.5132
6.47113	0.5343		6.47113	50.8982		6.47322	-0.51254
6.47447	0.52732		6.47447	49.2668		6.47655	-0.51194
6.4778	0.52059		6.4778	47.6725		6.47988	-0.51147
6.48113	0.51403		6.48113	46.1159		6.48322	-0.51123
6.48447	0.50759		6.48447	44.5971		6.48655	-0.51111
6.4878	0.50139		6.4878	43.116		6.48988	-0.51123
6.49113	0.49531		6.49113	41.6724		6.49322	-0.51153
6.49447	0.48935		6.49447	40.2661		6.49655	-0.51206
6.4978	0.48351		6.4978	38.8965		6.49988	-0.51272
6.50113	0.47779		6.50113	37.5631		6.50322	-0.51361
6.50447	0.47213		6.50447	36.2652		6.50655	-0.51469
6.5078	0.46653		6.5078	35.0021		6.50988	-0.51588
6.51113	0.46104		6.51113	33.773		6.51322	-0.51725
6.51447	0.45568		6.51447	32.577		6.51655	-0.51874
6.5178	0.45043		6.5178	31.4136		6.51988	-0.52041
6.52113	0.44537		6.52113	30.2817		6.52322	-0.52226
6.52447	0.44042		6.52447	29.1808		6.52655	-0.52428
6.5278	0.43565		6.5278	28.1103		6.52988	-0.52649
6.53113	0.43106		6.53113	27.0693		6.53322	-0.52893
6.53447	0.42659		6.53447	26.0575		6.53655	-0.53155
6.5378	0.4223		6.5378	25.074		6.53988	-0.53436
6.54113	0.41807		6.54113	24.1184		6.54322	-0.5374
6.54447	0.41389		6.54447	23.1901		6.54655	-0.54055
6.5478	0.40978		6.5478	22.2885		6.54988	-0.54383
6.55113	0.40573		6.55113	21.4132		6.55322	-0.54717
6.55447	0.40168		6.55447	20.5635		6.55655	-0.55063
6.5578	0.39762		6.5578	19.7393		6.55988	-0.55414
6.56113	0.39363		6.56113	18.94		6.56322	-0.5576
6.56447	0.3897		6.56447	18.1653		6.56655	-0.56112
6.5678	0.38588		6.5678	17.4149		6.56988	-0.56469
6.57113	0.38213		6.57113	16.6885		6.57322	-0.56827
6.57447	0.37843		6.57447	15.9857		6.57655	-0.57185
6.5778	0.37485		6.5778	15.3062		6.57988	-0.57554
6.58113	0.3714		6.58113	14.6498		6.58322	-0.57936
6.58447	0.36812		6.58447	14.0161		6.58655	-0.58329
6.5878	0.3649		6.5878	13.4047		6.58988	-0.58728
6.59113	0.3618		6.59113	12.8154		6.59322	-0.59134
6.59447	0.35876		6.59447	12.2479		6.59655	-0.59551
6.5978	0.35578		6.5978	11.7019		6.59988	-0.59962
6.60113	0.3528		6.60113	11.177		6.60322	-0.60374
6.60447	0.34988		6.60447	10.6729		6.60655	-0.60779
6.6078	0.34702		6.6078	10.1892		6.60988	-0.61178
6.61113	0.3441		6.61113	9.72563		6.61322	-0.6156
6.61447	0.3413		6.61447	9.28169		6.61655	-0.61941
6.6178	0.33844		6.6178	8.85695		6.61988	-0.62311
6.62113	0.33563		6.62113	8.45087		6.62322	-0.6268
6.62447	0.33289		6.62447	8.06296		6.62655	-0.63044
6.6278	0.33015		6.6278	7.69275		6.62988	-0.63407
6.63113	0.32747		6.63113	7.33978		6.63322	-0.63771
6.63447	0.3249		6.63447	7.00343		6.63655	-0.64129
6.6378	0.32234		6.6378	6.68329		6.63988	-0.64474
6.64113	0.31984		6.64113	6.37877		6.64322	-0.64814
6.64447	0.31734		6.64447	6.08939		6.64655	-0.65142
6.6478	0.31483		6.6478	5.81461		6.64988	-0.65458
6.65113	0.31233		6.65113	5.55384		6.65322	-0.65756
6.65447	0.30977		6.65447	5.30672		6.65655	-0.66042
6.6578	0.3072		6.6578	5.07253		6.65988	-0.66316
[truncated: 16,002 more rows]

## Sheet: FT-IR
UFSDF			FSDF
Wavenumber (cm-1)	Transmittance (%)		Wavenumber (cm-1)	Transmittance (%)
399.675	0		399.67	0
400.157	39.0121		400.16	45.48
400.639	38.9397		400.64	45.53
401.121	38.8436		401.12	45.62
401.603	38.7089		401.6	45.71
402.085	38.5369		402.09	45.81
402.567	38.3464		402.57	45.9
403.05	38.1647		403.05	45.98
403.532	38.0157		403.53	46.04
404.014	37.9109		404.01	46.06
404.496	37.8476		404.5	46.02
404.978	37.8129		404.98	45.92
405.46	37.7902		405.46	45.75
405.942	37.7664		405.94	45.56
406.424	37.7364		406.42	45.37
406.906	37.7021		406.91	45.23
407.389	37.6688		407.39	45.15
407.871	37.6399		407.87	45.12
408.353	37.6151		408.35	45.14
408.835	37.5904		408.84	45.17
409.317	37.564		409.32	45.21
409.799	37.5399		409.8	45.25
410.281	37.5087		410.28	45.28
410.763	37.4812		410.76	45.31
411.245	37.4629		411.25	45.33
411.728	37.4465		411.73	45.35
412.21	37.4255		412.21	45.35
412.692	37.3979		412.69	45.32
413.174	37.3545		413.17	45.26
413.656	37.319		413.66	45.17
414.138	37.2938		414.14	45.07
414.62	37.2811		414.62	44.96
415.103	37.2894		415.1	44.88
415.585	37.3139		415.58	44.81
416.067	37.3461		416.07	44.76
416.549	37.3743		416.55	44.73
417.031	37.3873		417.03	44.71
417.513	37.3735		417.51	44.7
417.995	37.3366		418	44.7
418.477	37.2762		418.48	44.68
418.959	37.2005		418.96	44.64
419.442	37.111		419.44	44.6
419.924	37.0201		419.92	44.54
420.406	36.9302		420.41	44.46
420.888	36.8445		420.89	44.38
421.37	36.7694		421.37	44.29
421.852	36.7182		421.85	44.2
422.334	36.6945		422.33	44.1
422.816	36.6967		422.82	44.01
423.298	36.7184		423.3	43.92
423.781	36.7351		423.78	43.82
424.263	36.7506		424.26	43.73
424.745	36.7496		424.74	43.66
425.227	36.7271		425.23	43.61
425.709	36.6895		425.71	43.59
426.191	36.6485		426.19	43.58
426.673	36.6037		426.67	43.59
427.155	36.5621		427.16	43.59
427.637	36.5265		427.64	43.57
428.12	36.4962		428.12	43.55
428.602	36.4672		428.6	43.52
429.084	36.4448		429.08	43.49
429.566	36.4278		429.57	43.48
430.048	36.4244		430.05	43.47
430.53	36.4085		430.53	43.47
431.012	36.3891		431.01	43.46
431.494	36.3542		431.49	43.43
431.977	36.3007		431.98	43.37
432.459	36.2344		432.46	43.3
432.941	36.1678		432.94	43.24
433.423	36.1142		433.42	43.18
433.905	36.0861		433.91	43.15
434.387	36.0798		434.39	43.12
434.869	36.0942		434.87	43.1
435.351	36.1176		435.35	43.08
435.834	36.1362		435.83	43.04
436.316	36.1423		436.32	42.99
436.798	36.1358		436.8	42.95
437.28	36.1173		437.28	42.91
437.762	36.0942		437.76	42.91
438.244	36.0615		438.24	42.93
438.726	36.0366		438.73	42.96
439.208	36.0169		439.21	43
439.69	35.9977		439.69	43.03
440.173	35.9734		440.17	43.04
440.655	35.9518		440.65	43.04
441.137	35.9289		441.14	43.02
441.619	35.9092		441.62	42.98
442.101	35.8878		442.1	42.94
442.583	35.8637		442.58	42.88
443.065	35.8357		443.07	42.81
443.547	35.797		443.55	42.73
444.029	35.7458		444.03	42.65
444.512	35.698		444.51	42.59
444.994	35.6427		444.99	42.53
445.476	35.5915		445.48	42.5
445.958	35.5394		445.96	42.48
446.44	35.4858		446.44	42.47
446.922	35.4282		446.92	42.45
447.404	35.364		447.4	42.42
447.886	35.2955		447.89	42.37
448.368	35.223		448.37	42.32
448.851	35.1613		448.85	42.27
449.333	35.1085		449.33	42.23
449.815	35.0549		449.81	42.2
450.297	35.0124		450.3	42.17
450.779	34.9772		450.78	42.13
451.261	34.942		451.26	42.11
451.743	34.9067		451.74	42.1
452.226	34.8734		452.23	42.09
452.708	34.8436		452.71	42.1
453.19	34.8126		453.19	42.1
453.672	34.7912		453.67	42.11
454.154	34.7751		454.15	42.09
454.636	34.7654		454.64	42.06
455.118	34.7612		455.12	42.01
455.6	34.7557		455.6	41.94
456.082	34.7509		456.08	41.85
456.565	34.7461		456.56	41.76
457.047	34.7361		457.05	41.67
457.529	34.7213		457.53	41.6
458.011	34.7045		458.01	41.54
458.493	34.6847		458.49	41.49
458.975	34.6597		458.98	41.46
459.457	34.6249		459.46	41.46
459.939	34.6076		459.94	41.45
460.421	34.577		460.42	41.46
460.904	34.5428		460.9	41.48
461.386	34.4994		461.39	41.49
461.868	34.4521		461.87	41.49
462.35	34.3977		462.35	41.46
462.832	34.3348		462.83	41.42
463.314	34.2804		463.31	41.38
463.796	34.235		463.8	41.33
464.278	34.2		464.28	41.29
464.76	34.1778		464.76	41.26
465.243	34.1568		465.24	41.23
465.725	34.143		465.72	41.2
466.207	34.1197		466.21	41.17
466.689	34.0863		466.69	41.13
467.171	34.0379		467.17	41.07
467.653	33.9863		467.65	41
468.135	33.9415		468.14	40.94
468.617	33.9092		468.62	40.89
469.099	33.888		469.1	40.83
469.582	33.8766		469.58	40.78
470.064	33.8649		470.06	40.72
470.546	33.8455		470.55	40.66
471.028	33.8115		471.03	40.61
471.51	33.7616		471.51	40.53
471.992	33.6952		471.99	40.46
472.474	33.6168		472.47	40.38
472.957	33.5322		472.96	40.29
473.439	33.4517		473.44	40.2
473.921	33.3766		473.92	40.1
474.403	33.3137		474.4	39.99
474.885	33.2529		474.88	39.89
475.367	33.1983		475.37	39.8
475.849	33.1431		475.85	39.73
476.331	33.0956		476.33	39.68
476.813	33.0441		476.81	39.65
477.296	32.9944		477.3	39.63
477.778	32.9344		477.78	39.62
478.26	32.8709		478.26	39.59
478.742	32.8107		478.74	39.55
479.224	32.7507		479.22	39.51
479.706	32.6968		479.71	39.47
480.188	32.6482		480.19	39.43
480.67	32.6125		480.67	39.39
481.152	32.5755		481.15	39.35
481.635	32.5309		481.63	39.31
482.117	32.4698		482.12	39.27
482.599	32.3972		482.6	39.23
483.081	32.3096		483.08	39.2
483.563	32.2082		483.56	39.16
484.045	32.1003		484.05	39.12
484.527	31.9972		484.53	39.06
485.009	31.891		485.01	39
485.491	31.7857		485.49	38.91
485.974	31.6746		485.97	38.83
486.456	31.57		486.46	38.74
486.938	31.4657		486.94	38.67
487.42	31.3591		487.42	38.62
487.902	31.261		487.9	38.58
488.384	31.165		488.38	38.56
488.866	31.0724		488.87	38.53
489.348	30.9794		489.35	38.49
489.831	30.884		489.83	38.45
490.313	30.7796		490.31	38.39
490.795	30.672		490.79	38.34
491.277	30.5625		491.28	38.29
491.759	30.4489		491.76	38.24
492.241	30.3345		492.24	38.18
492.723	30.213		492.72	38.13
493.205	30.0874		493.21	38.05
493.688	29.9515		493.69	37.98
494.17	29.822		494.17	37.9
494.652	29.6872		494.65	37.82
495.134	29.5562		495.13	37.76
495.616	29.4301		495.62	37.72
496.098	29.3126		496.1	37.68
496.58	29.1976		496.58	37.65
497.062	29.0887		497.06	37.6
497.544	28.9817		497.54	37.55
498.027	28.8799		498.03	37.49
498.509	28.7903		498.51	37.42
498.991	28.7071		498.99	37.36
499.473	28.6368		499.47	37.31
499.955	28.5701		499.96	37.25
500.437	28.508		500.44	37.19
500.919	28.4338		500.92	37.13
501.401	28.3505		501.4	37.07
501.884	28.2529		501.88	37
502.366	28.1394		502.37	36.94
502.848	28.0245		502.85	36.88
503.33	27.9107		503.33	36.84
503.812	27.7965		503.81	36.8
504.294	27.6931		504.29	36.75
504.776	27.5951		504.78	36.69
505.258	27.5008		505.26	36.62
505.74	27.4212		505.74	36.54
506.223	27.3437		506.22	36.47
506.705	27.2771		506.7	36.39
507.187	27.2135		507.19	36.31
507.669	27.152		507.67	36.23
508.151	27.0838		508.15	36.15
508.633	27.0089		508.63	36.07
509.115	26.925		509.12	35.98
509.597	26.8493		509.6	35.9
510.079	26.7721		510.08	35.83
510.562	26.7111		510.56	35.79
511.044	26.6662		511.04	35.75
511.526	26.6171		511.53	35.73
512.008	26.5704		512.01	35.7
512.49	26.5228		512.49	35.65
512.972	26.4753		512.97	35.58
513.454	26.4323		513.45	35.51
513.936	26.3968		513.94	35.43
514.418	26.3706		514.42	35.35
514.901	26.3515		514.9	35.28
515.383	26.3343		515.38	35.21
515.865	26.313		515.86	35.15
516.347	26.2824		516.35	35.09
516.829	26.2508		516.83	35.03
517.311	26.2138		517.31	34.98
517.793	26.1887		517.79	34.93
518.275	26.1676		518.28	34.9
518.758	26.1581		518.76	34.85
519.24	26.1445		519.24	34.79
519.722	26.1275		519.72	34.72
520.204	26.1056		520.2	34.64
520.686	26.0813		520.69	34.54
521.168	26.0595		521.17	34.45
521.65	26.045		521.65	34.37
522.132	26.0396		522.13	34.3
522.615	26.0385		522.61	34.24
523.097	26.0372		523.1	34.18
523.579	26.0406		523.58	34.13
524.061	26.032		524.06	34.06
524.543	26.0165		524.54	33.99
525.025	26.0065		525.03	33.92
525.507	26.0022		525.51	33.86
525.989	26.0165		525.99	33.82
526.471	26.042		526.47	33.79
526.954	26.0663		526.95	33.76
527.436	26.0832		527.44	33.72
527.918	26.0997		527.92	33.68
528.4	26.1044		528.4	33.63
528.882	26.1046		528.88	33.57
529.364	26.1051		529.36	33.52
529.846	26.1089		529.85	33.49
530.328	26.116		530.33	33.46
530.811	26.1243		530.81	33.44
531.293	26.1313		531.29	33.42
531.775	26.1369		531.77	33.39
532.257	26.1443		532.26	33.35
532.739	26.1585		532.74	33.3
533.221	26.1841		533.22	33.26
533.703	26.2227		533.7	33.23
534.185	26.2709		534.19	33.2
534.667	26.3222		534.67	33.19
535.149	26.37		535.15	33.17
535.632	26.4102		535.63	33.16
536.114	26.4433		536.11	33.15
536.596	26.473		536.6	33.14
537.078	26.5043		537.08	33.14
537.56	26.5402		537.56	33.15
538.042	26.5802		538.04	33.17
538.524	26.6206		538.52	33.18
539.006	26.654		539.01	33.17
539.489	26.6905		539.49	33.16
539.971	26.7182		539.97	33.12
540.453	26.7456		540.45	33.09
540.935	26.7768		540.93	33.05
541.417	26.8105		541.42	33.03
541.899	26.8569		541.9	33.02
542.381	26.8995		542.38	33.02
542.863	26.9377		542.86	33.02
543.346	26.9697		543.35	33.03
543.828	26.9936		543.83	33.03
544.31	27.021		544.31	33.03
544.792	27.0542		544.79	33.04
545.274	27.098		545.27	33.05
545.756	27.1466		545.76	33.07
546.238	27.1961		546.24	33.09
546.72	27.2474		546.72	33.11
547.202	27.2928		547.2	33.13
547.685	27.3321		547.68	33.14
548.167	27.3676		548.17	33.15
548.649	27.4015		548.65	33.16
549.131	27.4359		549.13	33.17
549.613	27.474		549.61	33.18
550.095	27.514		550.1	33.17
550.577	27.5532		550.58	33.15
551.059	27.5904		551.06	33.12
551.542	27.6262		551.54	33.07
552.024	27.6651		552.02	33.03
552.506	27.7104		552.51	33
552.988	27.7577		552.99	32.98
553.47	27.8052		553.47	32.98
553.952	27.8552		553.95	32.99
554.434	27.9025		554.43	33
554.916	27.9446		554.92	33
555.398	27.9838		555.4	33
555.881	28.0229		555.88	32.99
556.363	28.0617		556.36	32.98
556.845	28.1043		556.84	32.98
557.327	28.1488		557.33	32.97
557.809	28.1913		557.81	32.97
558.291	28.2274		558.29	32.96
558.773	28.2504		558.77	32.93
559.255	28.27		559.26	32.91
559.737	28.2835		559.74	32.89
560.22	28.2962		560.22	32.86
560.702	28.3115		560.7	32.85
561.184	28.3314		561.18	32.84
561.666	28.3511		561.67	32.83
562.148	28.3766		562.15	32.81
562.63	28.3978		562.63	32.79
563.112	28.4184		563.11	32.76
563.594	28.44		563.59	32.73
564.077	28.4643		564.08	32.71
564.559	28.4915		564.56	32.7
565.041	28.52		565.04	32.7
565.523	28.5466		565.52	32.7
566.005	28.5686		566.01	32.7
566.487	28.5847		566.49	32.68
566.969	28.596		566.97	32.67
567.451	28.6054		567.45	32.64
567.933	28.6156		567.93	32.62
568.416	28.623		568.42	32.6
568.898	28.6363		568.9	32.58
569.38	28.6433		569.38	32.56
569.862	28.6504		569.86	32.54
570.344	28.6521		570.34	32.51
570.826	28.6466		570.83	32.47
571.308	28.6399		571.31	32.44
571.79	28.6356		571.79	32.42
572.273	28.6363		572.27	32.41
572.755	28.6379		572.75	32.41
573.237	28.6471		573.24	32.42
573.719	28.658		573.72	32.44
574.201	28.6703		574.2	32.45
574.683	28.6853		574.68	32.47
575.165	28.7059		575.17	32.49
575.647	28.7341		575.65	32.52
576.13	28.7703		576.13	32.56
576.612	28.8114		576.61	32.59
577.094	28.8529		577.09	32.62
577.576	28.8901		577.58	32.64
578.058	28.9204		578.06	32.65
578.54	28.9442		578.54	32.65
579.022	28.9639		579.02	32.65
579.504	28.9824		579.5	32.65
579.986	29.0017		579.99	32.67
580.468	29.0218		580.47	32.7
580.951	29.0413		580.95	32.73
581.433	29.0586		581.43	32.77
581.915	29.0739		581.91	32.8
582.397	29.0888		582.4	32.84
582.879	29.1063		582.88	32.88
583.361	29.129		583.36	32.93
583.843	29.1574		583.84	32.99
584.325	29.1896		584.33	33.05
584.808	29.2219		584.81	33.11
585.29	29.2508		585.29	33.16
585.772	29.2747		585.77	33.2
586.254	29.2945		586.25	33.23
586.736	29.3129		586.74	33.26
587.218	29.3339		587.22	33.29
587.7	29.358		587.7	33.32
588.182	29.384		588.18	33.35
588.664	29.4091		588.66	33.39
589.147	29.4302		589.15	33.42
589.629	29.446		589.63	33.44
590.111	29.4572		590.11	33.45
590.593	29.467		590.59	33.45
591.075	29.4785		591.08	33.46
591.557	29.4938		591.56	33.48
592.039	29.5125		592.04	33.5
592.521	29.5321		592.52	33.52
593.004	29.5497		593	33.54
593.486	29.5634		593.49	33.55
593.968	29.5733		593.97	33.57
594.45	29.5812		594.45	33.59
594.932	29.5895		594.93	33.61
595.414	29.5998		595.41	33.64
595.896	29.6123		595.9	33.68
596.378	29.6258		596.38	33.71
596.861	29.6391		596.86	33.74
597.343	29.6515		597.34	33.75
597.825	29.6637		597.82	33.76
598.307	29.6773		598.31	33.76
598.789	29.6933		598.79	33.76
599.271	29.7118		599.27	33.76
599.753	29.7311		599.75	33.77
600.235	29.7491		600.24	33.77
600.717	29.7641		600.72	33.78
601.199	29.7763		601.2	33.77
601.682	29.7878		601.68	33.77
602.164	29.8016		602.16	33.77
602.646	29.8199		602.65	33.78
603.128	29.8428		603.13	33.8
603.61	29.8684		603.61	33.83
604.092	29.893		604.09	33.85
604.574	29.9137		604.57	33.87
605.057	29.9295		605.06	33.88
605.539	29.9421		605.54	33.88
606.021	29.955		606.02	33.89
606.503	29.9719		606.5	33.89
606.985	29.995		606.98	33.91
607.467	30.0236		607.47	33.92
607.949	30.0554		607.95	33.93
608.431	30.0872		608.43	33.93
608.913	30.1173		608.91	33.93
609.395	30.1453		609.4	33.92
609.878	30.1728		609.88	33.91
610.36	30.2015		610.36	33.91
610.842	30.2322		610.84	33.92
611.324	30.2639		611.32	33.94
611.806	30.2944		611.81	33.97
612.288	30.3218		612.29	34
612.77	30.3456		612.77	34.03
613.252	30.3673		613.25	34.06
613.735	30.3903		613.73	34.08
614.217	30.4179		614.22	34.1
614.699	30.452		614.7	34.13
615.181	30.4923		615.18	34.15
615.663	30.5359		615.66	34.18
616.145	30.5792		616.15	34.19
616.627	30.6189		616.63	34.2
617.109	30.6533		617.11	34.2
617.591	30.6828		617.59	34.19
618.074	30.7094		618.07	34.19
618.556	30.7354		618.56	34.18
619.038	30.7625		619.04	34.19
619.52	30.7911		619.52	34.19
620.002	30.8213		620	34.19
620.484	30.8528		620.48	34.19
620.966	30.8862		620.97	34.2
621.448	30.9223		621.45	34.21
621.931	30.9618		621.93	34.23
622.413	31.0046		622.41	34.26
622.895	31.0497		622.89	34.3
623.377	31.0954		623.38	34.34
623.859	31.1407		623.86	34.37
624.341	31.1853		624.34	34.39
624.823	31.2308		624.82	34.39
625.305	31.2791		625.31	34.39
625.788	31.3321		625.79	34.39
626.27	31.3903		626.27	34.38
626.752	31.4522		626.75	34.38
627.234	31.5157		627.23	34.39
627.716	31.5781		627.72	34.39
628.198	31.6383		628.2	34.4
628.68	31.6966		628.68	34.4
629.162	31.7546		629.16	34.42
629.644	31.8142		629.64	34.44
630.126	31.8768		630.13	34.47
630.609	31.9426		630.61	34.51
631.091	32.0107		631.09	34.55
631.573	32.0795		631.57	34.59
632.055	32.1477		632.06	34.62
632.537	32.2148		632.54	34.65
633.019	32.2803		633.02	34.68
633.501	32.3441		633.5	34.7
633.984	32.4054		633.98	34.73
634.466	32.463		634.47	34.75
634.948	32.516		634.95	34.77
635.43	32.5642		635.43	34.77
635.912	32.6083		635.91	34.77
636.394	32.6505		636.39	34.77
636.876	32.6928		636.88	34.77
637.358	32.7368		637.36	34.77
637.84	32.7824		637.84	34.79
638.322	32.8283		638.32	34.82
638.805	32.8724		638.8	34.85
639.287	32.9136		639.29	34.89
639.769	32.952		639.77	34.93
640.251	32.9892		640.25	34.96
640.733	33.0279		640.73	34.99
641.215	33.0698		641.22	35.03
641.697	33.1153		641.7	35.06
642.179	33.1627		642.18	35.1
642.662	33.2089		642.66	35.14
643.144	33.251		643.14	35.18
643.626	33.2875		643.63	35.2
644.108	33.3191		644.11	35.23
644.59	33.348		644.59	35.25
645.072	33.3773		645.07	35.27
645.554	33.4089		645.55	35.29
646.036	33.4432		646.04	35.31
646.519	33.4784		646.52	35.34
647.001	33.5118		647	35.36
647.483	33.5404		647.48	35.37
647.965	33.5626		647.96	35.39
648.447	33.5778		648.45	35.41
648.929	33.5872		648.93	35.44
649.411	33.5922		649.41	35.47
649.893	33.5946		649.89	35.51
650.375	33.5955		650.38	35.56
650.857	33.5959		650.86	35.6
651.34	33.5966		651.34	35.63
651.822	33.5987		651.82	35.67
652.304	33.6027		652.3	35.7
652.786	33.6088		652.79	35.73
653.268	33.6162		653.27	35.77
653.75	33.6234		653.75	35.81
654.232	33.6287		654.23	35.84
654.715	33.6312		654.71	35.87
655.197	33.6313		655.2	35.89
655.679	33.6302		655.68	35.91
656.161	33.6298		656.16	35.93
656.643	33.6312		656.64	35.94
657.125	33.6343		657.13	35.97
657.607	33.6375		657.61	36
658.089	33.6387		658.09	36.03
658.571	33.6363		658.57	36.05
659.053	33.6302		659.05	36.07
659.536	33.6221		659.54	36.09
660.018	33.6143		660.02	36.11
660.5	33.6088		660.5	36.14
660.982	33.6064		660.98	36.16
661.464	33.6061		661.46	36.19
661.946	33.6061		661.95	36.22
662.428	33.6053		662.43	36.25
662.91	33.6034		662.91	36.26
663.393	33.6018		663.39	36.28
663.875	33.602		663.87	36.29
664.357	33.6053		664.36	36.31
664.839	33.6112		664.84	36.34
665.321	33.6186		665.32	36.37
665.803	33.6266		665.8	36.39
666.285	33.6353		666.29	36.42
666.767	33.646		666.77	36.44
667.25	33.66		667.25	36.44
667.732	33.6759		667.73	36.44
668.214	33.6887		668.21	36.43
668.696	33.6939		668.7	36.44
669.178	33.6949		669.18	36.46
669.66	33.7		669.66	36.48
670.142	33.7126		670.14	36.5
670.624	33.7303		670.62	36.52
671.106	33.7494		671.11	36.54
671.589	33.768		671.59	36.56
672.071	33.7863		672.07	36.58
672.553	33.8058		672.55	36.61
673.035	33.8273		673.03	36.64
673.517	33.8511		673.52	36.66
673.999	33.8765		674	36.68
674.481	33.9029		674.48	36.69
674.963	33.93		674.96	36.71
675.446	33.9585		675.45	36.72
675.928	33.9892		675.93	36.73
676.41	34.0225		676.41	36.76
676.892	34.0574		676.89	36.79
677.374	34.0924		677.37	36.82
677.856	34.1254		677.86	36.86
678.338	34.1551		678.34	36.89
678.82	34.1814		678.82	36.91
679.302	34.2054		679.3	36.94
679.784	34.2286		679.78	36.97
680.267	34.2528		680.27	37.01
680.749	34.2787		680.75	37.04
681.231	34.3063		681.23	37.08
681.713	34.3349		681.71	37.12
682.195	34.3639		682.2	37.15
682.677	34.393		682.68	37.18
683.159	34.4223		683.16	37.21
683.641	34.4522		683.64	37.24
684.124	34.4826		684.12	37.28
684.606	34.5132		684.61	37.31
685.088	34.5435		685.09	37.34
685.57	34.5734		685.57	37.37
686.052	34.6032		686.05	37.4
686.534	34.6339		686.53	37.42
687.016	34.6666		687.02	37.45
687.498	34.7017		687.5	37.47
687.981	34.7387		687.98	37.5
688.463	34.7758		688.46	37.54
688.945	34.8108		688.94	37.57
689.427	34.842		689.43	37.59
689.909	34.8685		689.91	37.61
690.391	34.8914		690.39	37.62
690.873	34.9123		690.87	37.63
691.355	34.9333		691.36	37.64
691.837	34.956		691.84	37.65
692.32	34.9809		692.32	37.66
692.802	35.0072		692.8	37.66
693.284	35.0338		693.28	37.67
693.766	35.0597		693.77	37.67
694.248	35.0844		694.25	37.67
694.73	35.1081		694.73	37.67
695.212	35.1311		695.21	37.66
695.694	35.1536		695.69	37.66
696.177	35.1757		696.18	37.67
696.659	35.1968		696.66	37.67
697.141	35.2164		697.14	37.67
697.623	35.2343		697.62	37.66
698.105	35.2509		698.11	37.65
698.587	35.2666		698.59	37.64
699.069	35.282		699.07	37.63
699.551	35.2972		699.55	37.62
700.033	35.312		700.03	37.62
700.516	35.3255		700.52	37.61
700.998	35.3374		701	37.6
701.48	35.3472		701.48	37.59
701.962	35.3555		701.96	37.58
702.444	35.363		702.44	37.57
702.926	35.3704		702.93	37.57
703.408	35.378		703.41	37.58
703.89	35.3858		703.89	37.59
704.372	35.3934		704.37	37.6
704.855	35.4006		704.85	37.61
705.337	35.4077		705.34	37.62
705.819	35.4154		705.82	37.63
706.301	35.4248		706.3	37.64
706.783	35.4367		706.78	37.65
707.265	35.451		707.27	37.67
707.747	35.4671		707.75	37.69
708.229	35.4834		708.23	37.72
708.712	35.4986		708.71	37.74
709.194	35.5114		709.19	37.76
709.676	35.5215		709.68	37.79
710.158	35.5293		710.16	37.81
710.64	35.5351		710.64	37.84
711.122	35.5393		711.12	37.87
711.604	35.5414		711.6	37.9
712.086	35.5408		712.09	37.94
712.568	35.5361		712.57	37.97
713.051	35.5263		713.05	38
713.533	35.5106		713.53	38.03
714.015	35.4892		714.01	38.05
714.497	35.4625		714.5	38.08
714.979	35.4316		714.98	38.12
715.461	35.3982		715.46	38.15
715.943	35.3648		715.94	38.18
716.425	35.3343		716.43	38.21
716.908	35.3103		716.91	38.24
717.39	35.2967		717.39	38.26
717.872	35.2971		717.87	38.29
718.354	35.3143		718.35	38.32
718.836	35.3493		718.84	38.35
719.318	35.4014		719.32	38.38
719.8	35.4681		719.8	38.42
720.282	35.5459		720.28	38.46
720.764	35.6312		720.76	38.49
721.247	35.7216		721.25	38.53
721.729	35.8151		721.73	38.56
722.211	35.9106		722.21	38.6
722.693	36.0069		722.69	38.64
723.175	36.1026		723.18	38.69
723.657	36.1959		723.66	38.74
724.139	36.2852		724.14	38.79
724.621	36.369		724.62	38.84
725.104	36.4464		725.1	38.88
725.586	36.5168		725.59	38.93
726.068	36.5797		726.07	38.98
726.55	36.6355		726.55	39.03
727.032	36.6848		727.03	39.09
727.514	36.7287		727.51	39.16
727.996	36.7695		728	39.23
728.478	36.81		728.48	39.3
728.96	36.8534		728.96	39.37
729.443	36.9028		729.44	39.45
729.925	36.9607		729.92	39.53
730.407	37.0279		730.41	39.61
730.889	37.1041		730.89	39.69
731.371	37.1875		731.37	39.77
731.853	37.2755		731.85	39.84
732.335	37.3651		732.34	39.91
732.817	37.4534		732.82	39.98
733.299	37.5377		733.3	40.04
733.782	37.616		733.78	40.1
734.264	37.6868		734.26	40.17
734.746	37.7497		734.75	40.23
735.228	37.805		735.23	40.29
735.71	37.8539		735.71	40.36
736.192	37.8982		736.19	40.42
736.674	37.9397		736.67	40.48
737.156	37.9796		737.16	40.54
737.639	38.0184		737.64	40.61
738.121	38.056		738.12	40.67
738.603	38.0917		738.6	40.74
739.085	38.125		739.08	40.81
739.567	38.1556		739.57	40.88
740.049	38.1838		740.05	40.93
740.531	38.2105		740.53	40.99
741.013	38.2365		741.01	41.03
741.495	38.2623		741.5	41.08
741.978	38.2878		741.98	41.12
742.46	38.313		742.46	41.17
742.942	38.3372		742.94	41.21
743.424	38.3601		743.42	41.25
743.906	38.3813		743.91	41.29
744.388	38.4009		744.39	41.32
744.87	38.4189		744.87	41.36
745.352	38.4353		745.35	41.4
745.835	38.4501		745.83	41.44
746.317	38.4633		746.32	41.48
746.799	38.4748		746.8	41.52
747.281	38.4845		747.28	41.57
747.763	38.4924		747.76	41.6
748.245	38.4984		748.25	41.64
748.727	38.5021		748.73	41.67
749.209	38.5033		749.21	41.69
749.692	38.502		749.69	41.72
750.174	38.4981		750.17	41.74
750.656	38.4923		750.66	41.75
751.138	38.4856		751.14	41.75
751.62	38.479		751.62	41.76
752.102	38.4731		752.1	41.75
752.584	38.4683		752.58	41.76
753.066	38.4639		753.07	41.76
753.548	38.4592		753.55	41.77
754.03	38.4528		754.03	41.78
754.513	38.4439		754.51	41.8
754.995	38.4321		754.99	41.81
755.477	38.4177		755.48	41.83
755.959	38.4012		755.96	41.85
756.441	38.3836		756.44	41.86
756.923	38.3654		756.92	41.88
757.405	38.3471		757.41	41.91
757.888	38.329		757.89	41.93
758.37	38.3114		758.37	41.95
758.852	38.295		758.85	41.97
759.334	38.2803		759.33	41.98
759.816	38.2681		759.82	41.99
760.298	38.2592		760.3	42
760.78	38.2532		760.78	42.01
761.262	38.2495		761.26	42.02
761.744	38.2475		761.74	42.03
762.226	38.2462		762.23	42.04
762.709	38.2451		762.71	42.04
763.191	38.2439		763.19	42.05
763.673	38.2423		763.67	42.06
764.155	38.2405		764.16	42.08
764.637	38.2385		764.64	42.1
765.119	38.2364		765.12	42.13
765.601	38.2343		765.6	42.17
766.083	38.2325		766.08	42.2
766.566	38.2314		766.57	42.23
767.048	38.2309		767.05	42.26
767.53	38.231		767.53	42.29
768.012	38.2311		768.01	42.31
768.494	38.2304		768.49	42.33
768.976	38.2279		768.98	42.35
769.458	38.223		769.46	42.37
769.94	38.2155		769.94	42.38
770.423	38.2059		770.42	42.39
770.905	38.1949		770.9	42.39
771.387	38.1835		771.39	42.39
771.869	38.1725		771.87	42.39
772.351	38.1621		772.35	42.39
772.833	38.1517		772.83	42.4
773.315	38.1409		773.32	42.4
773.797	38.1285		773.8	42.4
774.279	38.1135		774.28	42.41
774.761	38.0953		774.76	42.41
775.244	38.0732		775.24	42.41
775.726	38.0469		775.73	42.41
776.208	38.0166		776.21	42.41
776.69	37.9827		776.69	42.41
777.172	37.946		777.17	42.41
777.654	37.9076		777.65	42.4
778.136	37.8686		778.14	42.4
778.619	37.8302		778.62	42.38
779.101	37.7928		779.1	42.36
779.583	37.7566		779.58	42.34
780.065	37.7214		780.06	42.33
780.547	37.6864		780.55	42.31
781.029	37.6509		781.03	42.3
781.511	37.6146		781.51	42.29
781.993	37.5774		781.99	42.28
782.475	37.5393		782.48	42.28
782.957	37.501		782.96	42.28
783.44	37.4626		783.44	42.28
783.922	37.4243		783.92	42.29
784.404	37.386		784.4	42.3
784.886	37.3473		784.89	42.32
785.368	37.3077		785.37	42.34
785.85	37.2668		785.85	42.37
786.332	37.2248		786.33	42.39
786.814	37.1817		786.81	42.4
787.297	37.1382		787.3	42.41
787.779	37.0948		787.78	42.42
788.261	37.0521		788.26	42.42
788.743	37.0101		788.74	42.41
789.225	36.9691		789.23	42.4
789.707	36.9286		789.71	42.37
790.189	36.8885		790.19	42.34
790.671	36.8483		790.67	42.31
791.154	36.8078		791.15	42.27
791.636	36.7668		791.64	42.24
792.118	36.7253		792.12	42.22
792.6	36.6837		792.6	42.2
793.082	36.6426		793.08	42.18
793.564	36.6026		793.56	42.16
794.046	36.5648		794.05	42.14
794.528	36.5299		794.53	42.13
795.01	36.4985		795.01	42.12
795.493	36.471		795.49	42.11
795.975	36.4474		795.97	42.11
796.457	36.4277		796.46	42.1
796.939	36.412		796.94	42.1
797.421	36.4005		797.42	42.09
797.903	36.3937		797.9	42.07
798.385	36.3924		798.39	42.06
798.867	36.3968		798.87	42.04
799.35	36.407		799.35	42.03
799.832	36.4226		799.83	42.02
800.314	36.4427		800.31	42.01
800.796	36.4666		800.8	42.01
801.278	36.494		801.28	42.01
801.76	36.525		801.76	42.02
802.242	36.56		802.24	42.04
802.724	36.5995		802.72	42.06
803.206	36.6434		803.21	42.09
803.688	36.6911		803.69	42.13
804.171	36.7413		804.17	42.18
804.653	36.7928		804.65	42.23
805.135	36.8446		805.13	42.29
805.617	36.8961		805.62	42.34
806.099	36.9473		806.1	42.39
806.581	36.9988		806.58	42.44
807.063	37.0509		807.06	42.5
807.545	37.1039		807.55	42.55
808.028	37.1576		808.03	42.6
808.51	37.2121		808.51	42.65
808.992	37.2672		808.99	42.7
809.474	37.3229		809.47	42.75
809.956	37.3792		809.96	42.8
810.438	37.4358		810.44	42.85
810.92	37.4921		810.92	42.92
811.402	37.5475		811.4	42.99
811.885	37.6013		811.88	43.07
812.367	37.6529		812.37	43.15
812.849	37.7021		812.85	43.24
813.331	37.7492		813.33	43.34
813.813	37.7943		813.81	43.44
814.295	37.8375		814.3	43.54
814.777	37.879		814.78	43.66
815.259	37.9185		815.26	43.77
815.741	37.956		815.74	43.89
816.224	37.9917		816.22	44
816.706	38.026		816.71	44.11
817.188	38.0594		817.19	44.22
817.67	38.092		817.67	44.32
818.152	38.1238		818.15	44.42
818.634	38.1541		818.63	44.52
819.116	38.182		819.12	44.63
819.598	38.2068		819.6	44.73
820.081	38.2279		820.08	44.83
820.563	38.2453		820.56	44.94
821.045	38.259		821.04	45.05
821.527	38.2692		821.53	45.17
822.009	38.2758		822.01	45.29
822.491	38.2788		822.49	45.42
822.973	38.2778		822.97	45.56
823.455	38.273		823.46	45.7
823.937	38.2646		823.94	45.83
824.42	38.2533		824.42	45.95
824.902	38.2399		824.9	46.07
825.384	38.2251		825.38	46.18
825.866	38.2094		825.87	46.29
826.348	38.1927		826.35	46.38
826.83	38.1754		826.83	46.47
827.312	38.1574		827.31	46.55
827.794	38.1394		827.79	46.62
828.277	38.1219		828.28	46.68
828.759	38.1056		828.76	46.74
829.241	38.0908		829.24	46.79
829.723	38.0774		829.72	46.85
830.205	38.0647		830.21	46.9
830.687	38.052		830.69	46.96
831.169	38.0383		831.17	47.02
831.651	38.0233		831.65	47.07
832.133	38.0067		832.13	47.13
832.615	37.9888		832.62	47.19
833.098	37.9697		833.1	47.25
833.58	37.9498		833.58	47.31
834.062	37.9288		834.06	47.36
834.544	37.907		834.54	47.42
835.026	37.8843		835.03	47.47
835.508	37.861		835.51	47.51
835.99	37.8376		835.99	47.55
836.472	37.8145		836.47	47.59
836.955	37.7919		836.95	47.62
837.437	37.7694		837.44	47.66
837.919	37.7465		837.92	47.69
838.401	37.7226		838.4	47.72
838.883	37.6973		838.88	47.75
839.365	37.6705		839.37	47.77
839.847	37.6429		839.85	47.8
840.329	37.6154		840.33	47.84
840.812	37.5887		840.81	47.88
841.294	37.5631		841.29	47.92
841.776	37.5384		841.78	47.98
842.258	37.5139		842.26	48.03
842.74	37.4887		842.74	48.08
843.222	37.4619		843.22	48.12
843.704	37.4336		843.7	48.16
844.186	37.404		844.19	48.19
844.668	37.3742		844.67	48.22
845.151	37.3453		845.15	48.24
845.633	37.3182		845.63	48.26
846.115	37.2936		846.11	48.27
846.597	37.2717		846.6	48.28
847.079	37.2527		847.08	48.28
847.561	37.2364		847.56	48.28
848.043	37.2223		848.04	48.28
848.525	37.2105		848.53	48.28
849.008	37.2006		849.01	48.28
849.49	37.1925		849.49	48.29
849.972	37.1863		849.97	48.3
850.454	37.1822		850.45	48.31
850.936	37.1806		850.94	48.32
851.418	37.1826		851.42	48.32
851.9	37.1887		851.9	48.33
852.382	37.1998		852.38	48.35
852.864	37.2159		852.86	48.36
853.347	37.2366		853.35	48.37
853.829	37.261		853.83	48.39
854.311	37.2883		854.31	48.4
854.793	37.3179		854.79	48.4
855.275	37.3494		855.28	48.4
855.757	37.3833		855.76	48.4
856.239	37.42		856.24	48.4
856.721	37.46		856.72	48.4
857.203	37.5033		857.2	48.4
857.686	37.5498		857.69	48.4
858.168	37.5988		858.17	48.4
858.65	37.6501		858.65	48.4
859.132	37.7036		859.13	48.41
859.614	37.759		859.61	48.41
860.096	37.8165		860.1	48.42
860.578	37.8755		860.58	48.42
861.06	37.9356		861.06	48.43
861.543	37.9959		861.54	48.43
862.025	38.0558		862.02	48.43
862.507	38.1151		862.51	48.43
862.989	38.174		862.99	48.42
863.471	38.2327		863.47	48.41
863.953	38.2914		863.95	48.39
864.435	38.3496		864.44	48.38
864.917	38.4064		864.92	48.36
865.399	38.4605		865.4	48.34
865.882	38.5108		865.88	48.32
866.364	38.5567		866.36	48.29
866.846	38.5987		866.85	48.26
867.328	38.6373		867.33	48.22
867.81	38.6735		867.81	48.19
868.292	38.7081		868.29	48.15
868.774	38.7413		868.77	48.11
869.256	38.773		869.26	48.08
869.739	38.803		869.74	48.04
870.221	38.8309		870.22	48
870.703	38.8568		870.7	47.97
871.185	38.8802		871.18	47.93
871.667	38.9009		871.67	47.9
872.149	38.918		872.15	47.86
872.631	38.9306		872.63	47.83
873.113	38.9379		873.11	47.79
873.596	38.9395		873.6	47.75
874.078	38.9356		874.08	47.71
874.56	38.9268		874.56	47.66
875.042	38.9138		875.04	47.61
875.524	38.8972		875.52	47.56
876.006	38.8772		876.01	47.5
876.488	38.8535		876.49	47.45
876.97	38.8258		876.97	47.41
877.452	38.7939		877.45	47.36
877.934	38.7583		877.93	47.32
878.417	38.7192		878.42	47.28
878.899	38.6773		878.9	47.25
879.381	38.6327		879.38	47.22
879.863	38.585		879.86	47.2
880.345	38.5337		880.35	47.19
880.827	38.4783		880.83	47.18
881.309	38.4182		881.31	47.18
881.791	38.3537		881.79	47.18
882.274	38.2853		882.27	47.18
882.756	38.2134		882.76	47.19
883.238	38.1384		883.24	47.2
883.72	38.06		883.72	47.21
884.202	37.9774		884.2	47.23
884.684	37.8899		884.68	47.25
885.166	37.7966		885.17	47.27
885.648	37.6969		885.65	47.28
886.13	37.5908		886.13	47.29
886.613	37.4786		886.61	47.3
887.095	37.3608		887.09	47.31
887.577	37.238		887.58	47.31
888.059	37.111		888.06	47.31
888.541	36.9806		888.54	47.32
889.023	36.8475		889.02	47.32
889.505	36.7124		889.51	47.32
889.987	36.5761		889.99	47.32
890.47	36.4391		890.47	47.32
890.952	36.3022		890.95	47.32
891.434	36.1659		891.43	47.32
891.916	36.0308		891.92	47.32
892.398	35.8972		892.4	47.33
892.88	35.7654		892.88	47.33
893.362	35.6356		893.36	47.32
893.844	35.5082		893.84	47.31
894.326	35.3838		894.33	47.3
894.808	35.2628		894.81	47.28
895.291	35.1463		895.29	47.26
895.773	35.0347		895.77	47.23
896.255	34.9285		896.25	47.21
896.737	34.8279		896.74	47.18
897.219	34.7328		897.22	47.14
897.701	34.6432		897.7	47.1
898.183	34.559		898.18	47.07
898.665	34.4806		898.67	47.03
899.148	34.4082		899.15	47
899.63	34.3415		899.63	46.97
900.112	34.2801		900.11	46.94
900.594	34.2228		900.59	46.91
901.076	34.1684		901.08	46.88
901.558	34.1159		901.56	46.86
902.04	34.065		902.04	46.83
902.522	34.0159		902.52	46.8
903.005	33.9691		903	46.78
903.487	33.9252		903.49	46.75
903.969	33.884		903.97	46.73
904.451	33.8447		904.45	46.7
904.933	33.806		904.93	46.67
905.415	33.7666		905.42	46.64
905.897	33.7259		905.9	46.61
906.379	33.6835		906.38	46.58
906.861	33.6397		906.86	46.55
907.344	33.5947		907.34	46.52
907.826	33.5482		907.83	46.5
908.308	33.4994		908.31	46.47
908.79	33.4473		908.79	46.44
909.272	33.3908		909.27	46.41
909.754	33.3296		909.75	46.38
910.236	33.2642		910.24	46.34
910.718	33.1957		910.72	46.31
911.201	33.1249		911.2	46.29
911.683	33.0524		911.68	46.26
912.165	32.978		912.16	46.23
912.647	32.9009		912.65	46.2
913.129	32.8202		913.13	46.17
913.611	32.7357		913.61	46.13
914.093	32.6478		914.09	46.1
914.575	32.5575		914.58	46.06
915.057	32.4658		915.06	46.01
915.54	32.3733		915.54	45.97
916.022	32.2799		916.02	45.92
916.504	32.1848		916.5	45.86
916.986	32.0873		916.99	45.81
917.468	31.9876		917.47	45.75
917.95	31.8866		917.95	45.69
918.432	31.7861		918.43	45.64
918.914	31.688		918.91	45.59
919.396	31.5933		919.4	45.55
919.879	31.502		919.88	45.51
920.361	31.4128		920.36	45.47
920.843	31.3242		920.84	45.44
921.325	31.2351		921.33	45.41
921.807	31.1456		921.81	45.38
922.289	31.0565		922.29	45.35
922.771	30.9694		922.77	45.32
923.253	30.8852		923.25	45.3
923.736	30.8042		923.74	45.27
924.218	30.7255		924.22	45.24
924.7	30.648		924.7	45.21
925.182	30.5709		925.18	45.18
925.664	30.4944		925.66	45.14
926.146	30.4198		926.15	45.11
926.628	30.3481		926.63	45.07
927.11	30.2801		927.11	45.04
927.592	30.2154		927.59	45.01
928.075	30.1527		928.07	44.98
928.557	30.0903		928.56	44.95
929.039	30.0272		929.04	44.93
929.521	29.9636		929.52	44.91
930.003	29.9005		930	44.88
930.485	29.8396		930.49	44.86
930.967	29.782		930.97	44.84
931.449	29.7277		931.45	44.81
931.932	29.6754		931.93	44.78
932.414	29.6237		932.41	44.73
932.896	29.571		932.9	44.68
933.378	29.5173		933.38	44.62
933.86	29.4631		933.86	44.56
934.342	29.4096		934.34	44.49
934.824	29.3578		934.82	44.41
935.306	29.3074		935.31	44.33
935.788	29.2575		935.79	44.24
936.271	29.2066		936.27	44.15
936.753	29.1538		936.75	44.05
937.235	29.0991		937.23	43.95
937.717	29.0436		937.72	43.84
938.199	28.9885		938.2	43.74
938.681	28.9348		938.68	43.63
939.163	28.8825		939.16	43.52
939.645	28.8306		939.65	43.41
940.128	28.7781		940.13	43.28
940.61	28.7243		940.61	43.16
941.092	28.6696		941.09	43.02
941.574	28.615		941.57	42.88
942.056	28.5618		942.06	42.73
942.538	28.5104		942.54	42.58
943.02	28.4601		943.02	42.42
943.502	28.4094		943.5	42.26
943.984	28.3565		943.98	42.08
944.467	28.3006		944.47	41.9
944.949	28.2424		944.95	41.71
945.431	28.1836		945.43	41.52
945.913	28.1261		945.91	41.33
946.395	28.0712		946.4	41.15
946.877	28.0191		946.88	40.96
947.359	27.9684		947.36	40.78
947.841	27.9175		947.84	40.6
948.323	27.8654		948.32	40.42
948.806	27.8124		948.81	40.24
949.288	27.7596		949.29	40.06
949.77	27.7084		949.77	39.88
950.252	27.6595		950.25	39.71
950.734	27.6122		950.73	39.54
951.216	27.565		951.22	39.37
951.698	27.5159		951.7	39.2
952.18	27.464		952.18	39.02
952.663	27.4101		952.66	38.85
953.145	27.3561		953.14	38.67
953.627	27.3045		953.63	38.5
954.109	27.2569		954.11	38.34
954.591	27.213		954.59	38.17
955.073	27.1713		955.07	38.01
955.555	27.1292		955.56	37.86
956.037	27.0848		956.04	37.7
956.519	27.0377		956.52	37.54
957.002	26.9887		957	37.39
957.484	26.9394		957.48	37.24
957.966	26.8907		957.97	37.1
958.448	26.8428		958.45	36.96
958.93	26.7946		958.93	36.82
959.412	26.7444		959.41	36.68
959.894	26.6912		959.89	36.53
960.376	26.6353		960.38	36.39
960.859	26.5779		960.86	36.24
961.341	26.5206		961.34	36.1
961.823	26.4641		961.82	35.95
962.305	26.4076		962.3	35.81
962.787	26.3492		962.79	35.66
963.269	26.2864		963.27	35.51
963.751	26.2173		963.75	35.35
964.233	26.1416		964.23	35.19
964.716	26.0606		964.72	35.02
965.198	25.976		965.2	34.85
965.68	25.8889		965.68	34.69
966.162	25.7993		966.16	34.52
966.644	25.7056		966.64	34.35
967.126	25.6058		967.13	34.18
967.608	25.4986		967.61	34
968.09	25.3837		968.09	33.81
968.572	25.2626		968.57	33.62
969.054	25.1372		969.05	33.43
969.537	25.0088		969.54	33.24
970.019	24.8775		970.02	33.04
970.501	24.742		970.5	32.85
970.983	24.6008		970.98	32.65
971.465	24.4529		971.47	32.44
971.947	24.2987		971.95	32.23
972.429	24.1401		972.43	32.01
972.911	23.9795		972.91	31.8
973.394	23.8183		973.39	31.58
973.876	23.6563		973.88	31.37
974.358	23.4922		974.36	31.16
974.84	23.324		974.84	30.95
975.322	23.1505		975.32	30.73
975.804	22.9726		975.8	30.52
976.286	22.7925		976.29	30.3
976.768	22.6132		976.77	30.08
977.25	22.4365		977.25	29.88
977.733	22.2621		977.73	29.68
978.215	22.0881		978.21	29.48
978.697	21.9119		978.7	29.28
979.179	21.7319		979.18	29.09
979.661	21.5487		979.66	28.89
980.143	21.3649		980.14	28.69
980.625	21.1841		980.63	28.5
981.107	21.0088		981.11	28.31
981.59	20.8395		981.59	28.12
982.072	20.6745		982.07	27.93
982.554	20.5109		982.55	27.75
983.036	20.3467		983.04	27.55
983.518	20.1818		983.52	27.36
984	20.0182		984	27.17
984.482	19.8589		984.48	26.98
984.964	19.7061		984.96	26.79
985.447	19.5598		985.45	26.62
985.929	19.418		985.93	26.44
986.411	19.2778		986.41	26.27
986.893	19.1373		986.89	26.08
987.375	18.9965		987.37	25.9
987.857	18.8577		987.86	25.71
988.339	18.7241		988.34	25.52
988.821	18.5978		988.82	25.33
989.303	18.4789		989.3	25.15
989.785	18.3653		989.79	24.97
990.268	18.2542		990.27	24.79
990.75	18.1436		990.75	24.6
991.232	18.034		991.23	24.4
991.714	17.928		991.71	24.21
992.196	17.8291		992.2	24.01
992.678	17.7397		992.68	23.83
993.16	17.6594		993.16	23.65
993.643	17.5855		993.64	23.48
994.125	17.5144		994.12	23.3
994.607	17.4434		994.61	23.12
995.089	17.3721		995.09	22.94
995.571	17.3026		995.57	22.76
996.053	17.238		996.05	22.58
996.535	17.1807		996.54	22.4
997.017	17.1305		997.02	22.24
997.499	17.0851		997.5	22.07
997.981	17.0415		997.98	21.91
998.464	16.9974		998.46	21.74
998.946	16.9529		998.95	21.57
999.428	16.91		999.43	21.39
999.91	16.8716		999.91	21.22
1000.39	16.8392		1000.39	21.06
1000.87	16.8118		1000.87	20.9
1001.36	16.7865		1001.36	20.75
1001.84	16.7595		1001.84	20.6
1002.32	16.7287		1002.32	20.44
1002.8	16.6941		1002.8	20.27
1003.28	16.6581		1003.29	20.11
1003.77	16.6239		1003.77	19.95
1004.25	16.5928		1004.25	19.8
1004.73	16.5638		1004.73	19.65
1005.21	16.5334		1005.21	19.51
1005.7	16.4974		1005.7	19.36
1006.18	16.4532		1006.18	19.21
1006.66	16.4009		1006.66	19.05
1007.14	16.3435		1007.14	18.89
1007.62	16.2846		1007.62	18.74
1008.11	16.2267		1008.11	18.59
1008.59	16.1694		1008.59	18.45
1009.07	16.1098		1009.07	18.31
1009.55	16.044		1009.55	18.17
1010.03	15.9696		1010.03	18.03
1010.52	15.8868		1010.52	17.87
1011	15.7986		1011	17.71
1011.48	15.7089		1011.48	17.55
1011.96	15.6204		1011.96	17.39
1012.45	15.5331		1012.45	17.23
1012.93	15.4444		1012.93	17.07
1013.41	15.3506		1013.41	16.9
1013.89	15.2496		1013.89	16.71
1014.37	15.1419		1014.37	16.52
1014.86	15.0311		1014.86	16.32
1015.34	14.9215		1015.34	16.11
1015.82	14.8162		1015.82	15.92
1016.3	14.7153		1016.3	15.72
1016.78	14.6159		1016.78	15.53
1017.27	14.5145		1017.27	15.33
1017.75	14.4084		1017.75	15.12
1018.23	14.2982		1018.23	14.91
1018.71	14.1873		1018.71	14.69
1019.2	14.0798		1019.2	14.49
1019.68	13.9784		1019.68	14.29
1020.16	13.8829		1020.16	14.1
1020.64	13.7899		1020.64	13.92
1021.12	13.6953		1021.12	13.74
1021.61	13.5966		1021.61	13.55
1022.09	13.4945		1022.09	13.37
1022.57	13.3928		1022.57	13.19
1023.05	13.2963		1023.05	13.01
1023.53	13.2084		1023.53	12.86
1024.02	13.1287		1024.02	12.72
1024.5	13.0534		1024.5	12.6
1024.98	12.9777		1024.98	12.47
1025.46	12.898		1025.46	12.35
1025.94	12.8142		1025.94	12.23
1026.43	12.7294		1026.43	12.12
1026.91	12.648		1026.91	12.02
1027.39	12.573		1027.39	11.94
1027.87	12.5038		1027.87	11.88
1028.36	12.4369		1028.36	11.83
1028.84	12.3674		1028.84	11.78
1029.32	12.2919		1029.32	11.73
1029.8	12.2108		1029.8	11.69
1030.28	12.1276		1030.28	11.64
1030.77	12.0475		1030.77	11.62
1031.25	11.9739		1031.25	11.6
1031.73	11.9067		1031.73	11.6
1032.21	11.8424		1032.21	11.61
1032.69	11.7761		1032.69	11.63
1033.18	11.7043		1033.18	11.63
1033.66	11.627		1033.66	11.64
1034.14	11.5477		1034.14	11.64
1034.62	11.4712		1034.62	11.65
1035.1	11.401		1035.1	11.68
1035.59	11.3371		1035.59	11.71
1036.07	11.2762		1036.07	11.75
1036.55	11.2138		1036.55	11.79
1037.03	11.1469		1037.03	11.83
1037.52	11.076		1037.52	11.86
1038	11.0051		1038	11.89
1038.48	10.9397		1038.48	11.93
1038.96	10.8834		1038.96	11.97
1039.44	10.8361		1039.44	12.03
1039.93	10.7942		1039.93	12.09
1040.41	10.7525		1040.41	12.14
1040.89	10.7075		1040.89	12.19
1041.37	10.6596		1041.37	12.23
1041.85	10.6128		1041.85	12.28
1042.34	10.5724		1042.34	12.32
1042.82	10.5425		1042.82	12.37
1043.3	10.523		1043.3	12.44
1043.78	10.5105		1043.78	12.5
1044.27	10.4995		1044.27	12.55
1044.75	10.4864		1044.75	12.6
1045.23	10.4713		1045.23	12.64
1045.71	10.4577		1045.71	12.67
1046.19	10.4506		1046.19	12.7
1046.67	10.4535		1046.68	12.75
1047.16	10.4658		1047.16	12.8
1047.64	10.4836		1047.64	12.85
1048.12	10.5013		1048.12	12.9
1048.6	10.5147		1048.6	12.94
1049.09	10.5238		1049.09	12.97
1049.57	10.5319		1049.57	12.99
1050.05	10.544		1050.05	13.02
1050.53	10.5633		1050.53	13.06
1051.01	10.5898		1051.01	13.1
1051.5	10.6195		1051.5	13.13
1051.98	10.6471		1051.98	13.17
1052.46	10.6693		1052.46	13.19
1052.94	10.686		1052.94	13.2
1053.42	10.7011		1053.43	13.21
1053.91	10.7195		1053.91	13.23
1054.39	10.7448		1054.39	13.25
1054.87	10.7767		1054.87	13.27
1055.35	10.8111		1055.35	13.3
1055.84	10.8428		1055.84	13.33
1056.32	10.8681		1056.32	13.34
1056.8	10.8871		1056.8	13.35
1057.28	10.9033		1057.28	13.36
1057.76	10.9218		1057.76	13.37
1058.25	10.946		1058.25	13.39
1058.73	10.9756		1058.73	13.42
1059.21	11.0069		1059.21	13.45
1059.69	11.0348		1059.69	13.47
1060.17	11.0558		1060.18	13.48
1060.66	11.0701		1060.66	13.49
1061.14	11.0816		1061.14	13.48
1061.62	11.0952		1061.62	13.48
1062.1	11.1141		1062.1	13.49
1062.59	11.138		1062.59	13.5
1063.07	11.1627		1063.07	13.51
1063.55	11.1828		1063.55	13.51
1064.03	11.1946		1064.03	13.5
1064.51	11.1983		1064.51	13.47
1065	11.1977		1065	13.44
1065.48	11.1981		1065.48	13.41
1065.96	11.2027		1065.96	13.39
1066.44	11.2116		1066.44	13.37
1066.92	11.2204		1066.92	13.35
1067.41	11.2239		1067.41	13.32
1067.89	11.2182		1067.89	13.28
1068.37	11.2033		1068.37	13.22
1068.85	11.183		1068.85	13.16
1069.34	11.1624		1069.34	13.11
1069.82	11.1454		1069.82	13.06
1070.3	11.1322		1070.3	13.01
1070.78	11.1194		1070.78	12.96
1071.26	11.1024		1071.26	12.91
1071.74	11.0784		1071.75	12.84
1072.23	11.048		1072.23	12.77
1072.71	11.0156		1072.71	12.69
1073.19	10.9869		1073.19	12.62
1073.67	10.9657		1073.67	12.56
1074.16	10.9522		1074.16	12.51
1074.64	10.9428		1074.64	12.47
1075.12	10.9324		1075.12	12.43
1075.6	10.9183		1075.6	12.39
1076.08	10.9009		1076.08	12.34
1076.57	10.8849		1076.57	12.3
1077.05	10.8757		1077.05	12.27
1077.53	10.8769		1077.53	12.26
1078.01	10.8881		1078.01	12.26
1078.49	10.9051		1078.5	12.27
1078.98	10.9222		1078.98	12.28
1079.46	10.9358		1079.46	12.3
1079.94	10.9466		1079.94	12.31
1080.42	10.9587		1080.42	12.32
1080.91	10.9779		1080.91	12.35
1081.39	11.0078		1081.39	12.39
1081.87	11.0479		1081.87	12.44
1082.35	11.0938		1082.35	12.49
1082.83	11.1395		1082.83	12.55
1083.32	11.1809		1083.32	12.6
1083.8	11.2178		1083.8	12.64
1084.28	11.2541		1084.28	12.68
1084.76	11.2951		1084.76	12.73
1085.24	11.3443		1085.25	12.79
1085.73	11.4012		1085.73	12.86
1086.21	11.4617		1086.21	12.94
1086.69	11.5198		1086.69	13.01
1087.17	11.5716		1087.17	13.08
1087.65	11.6171		1087.66	13.13
1088.14	11.6598		1088.14	13.19
1088.62	11.7051		1088.62	13.26
1089.1	11.7565		1089.1	13.33
1089.58	11.8137		1089.58	13.41
1090.07	11.8726		1090.07	13.5
1090.55	11.9278		1090.55	13.58
1091.03	11.9754		1091.03	13.66
1091.51	12.0154		1091.51	13.72
1091.99	12.0515		1091.99	13.79
1092.48	12.0887		1092.48	13.86
1092.96	12.1305		1092.96	13.95
1093.44	12.1767		1093.44	14.04
1093.92	12.2234		1093.92	14.13
1094.4	12.2657		1094.41	14.23
1094.89	12.3		1094.89	14.31
1095.37	12.3268		1095.37	14.39
1095.85	12.3501		1095.85	14.47
1096.33	12.3753		1096.33	14.56
1096.82	12.406		1096.82	14.65
1097.3	12.4421		1097.3	14.76
1097.78	12.4797		1097.78	14.86
1098.26	12.5138		1098.26	14.96
1098.74	12.5405		1098.74	15.06
1099.23	12.56		1099.23	15.14
1099.71	12.5759		1099.71	15.23
1100.19	12.5934		1100.19	15.31
1100.67	12.616		1100.67	15.41
1101.15	12.6439		1101.16	15.51
1101.64	12.6734		1101.64	15.61
1102.12	12.6998		1102.12	15.71
1102.6	12.7195		1102.6	15.8
1103.08	12.7329		1103.08	15.88
1103.57	12.7435		1103.57	15.97
1104.05	12.7564		1104.05	16.05
1104.53	12.775		1104.53	16.15
1105.01	12.7993		1105.01	16.25
1105.49	12.826		1105.49	16.36
1105.98	12.8502		1105.98	16.47
1106.46	12.8687		1106.46	16.57
1106.94	12.8819		1106.94	16.66
1107.42	12.8934		1107.42	16.74
1107.9	12.9081		1107.9	16.84
1108.39	12.9294		1108.39	16.94
1108.87	12.9569		1108.87	17.04
1109.35	12.9872		1109.35	17.15
1109.83	13.0155		1109.83	17.25
1110.32	13.0385		1110.32	17.35
1110.8	13.0564		1110.8	17.43
1111.28	13.073		1111.28	17.52
1111.76	13.0931		1111.76	17.6
1112.24	13.1199		1112.24	17.7
1112.72	13.1532		1112.73	17.8
1113.21	13.1895		1113.21	17.9
1113.69	13.2238		1113.69	17.99
1114.17	13.2532		1114.17	18.08
1114.65	13.278		1114.65	18.16
1115.14	13.302		1115.14	18.23
1115.62	13.3302		1115.62	18.31
1116.1	13.366		1116.1	18.39
1116.58	13.409		1116.58	18.48
1117.06	13.4556		1117.06	18.56
1117.55	13.5008		1117.55	18.64
1118.03	13.5412		1118.03	18.71
1118.51	13.5767		1118.51	18.77
1118.99	13.6107		1118.99	18.82
1119.47	13.648		1119.48	18.87
1119.96	13.6919		1119.96	18.92
1120.44	13.7424		1120.44	18.98
1120.92	13.7965		1120.92	19.04
1121.4	13.8498		1121.4	19.09
1121.88	13.8993		1121.89	19.13
1122.37	13.9453		1122.37	19.16
1122.85	13.9912		1122.85	19.2
1123.33	14.0416		1123.33	19.24
1123.81	14.0995		1123.81	19.28
1124.3	14.1646		1124.3	19.34
1124.78	14.2335		1124.78	19.4
1125.26	14.3017		1125.26	19.46
1125.74	14.3661		1125.74	19.52
1126.22	14.4269		1126.23	19.57
1126.71	14.4875		1126.71	19.62
1127.19	14.5524		1127.19	19.68
1127.67	14.6244		1127.67	19.75
1128.15	14.7036		1128.15	19.82
1128.63	14.7866		1128.64	19.89
1129.12	14.869		1129.12	19.96
1129.6	14.9478		1129.6	20.03
1130.08	15.0229		1130.08	20.09
1130.56	15.0971		1130.56	20.15
1131.05	15.1743		1131.05	20.21
1131.53	15.257		1131.53	20.28
1132.01	15.3448		1132.01	20.36
1132.49	15.4343		1132.49	20.44
1132.97	15.5212		1132.97	20.51
1133.46	15.6026		1133.46	20.57
1133.94	15.6784		1133.94	20.63
1134.42	15.7513		1134.42	20.69
1134.9	15.825		1134.9	20.74
1135.38	15.9019		1135.39	20.8
1135.87	15.9815		1135.87	20.86
1136.35	16.0606		1136.35	20.92
1136.83	16.1349		1136.83	20.97
1137.31	16.2018		1137.31	21.01
1137.8	16.2613		1137.8	21.03
1138.28	16.3162		1138.28	21.06
1138.76	16.37		1138.76	21.08
1139.24	16.4254		1139.24	21.1
1139.72	16.4817		1139.72	21.13
1140.21	16.5361		1140.21	21.15
1140.69	16.5845		1140.69	21.17
1141.17	16.6243		1141.17	21.18
1141.65	16.6558		1141.65	21.19
1142.13	16.6818		1142.13	21.19
1142.62	16.7063		1142.62	21.2
1143.1	16.7321		1143.1	21.22
1143.58	16.7593		1143.58	21.24
1144.06	16.7852		1144.06	21.26
1144.55	16.8065		1144.55	21.29
1145.03	16.8207		1145.03	21.3
1145.51	16.8282		1145.51	21.32
1145.99	16.8317		1145.99	21.34
1146.47	16.835		1146.47	21.36
1146.96	16.8407		1146.96	21.39
1147.44	16.8486		1147.44	21.43
1147.92	16.8563		1147.92	21.48
1148.4	16.8606		1148.4	21.53
1148.88	16.8595		1148.88	21.57
1149.37	16.8539		1149.37	21.62
1149.85	16.8469		1149.85	21.67
1150.33	16.843		1150.33	21.73
1150.81	16.8449		1150.81	21.8
1151.3	16.8527		1151.3	21.88
1151.78	16.8638		1151.78	21.98
1152.26	16.8747		1152.26	22.08
1152.74	16.8833		1152.74	22.18
1153.22	16.89		1153.22	22.29
1153.7	16.8981		1153.71	22.4
1154.19	16.9116		1154.19	22.53
1154.67	16.9335		1154.67	22.67
1155.15	16.9641		1155.15	22.83
1155.63	17.0007		1155.63	23
1156.12	17.0399		1156.12	23.17
1156.6	17.0792		1156.6	23.35
1157.08	17.1187		1157.08	23.54
1157.56	17.161		1157.56	23.73
1158.04	17.2096		1158.04	23.94
1158.53	17.2668		1158.53	24.16
1159.01	17.3322		1159.01	24.4
1159.49	17.4033		1159.49	24.64
1159.97	17.4763		1159.97	24.89
1160.45	17.549		1160.46	25.15
1160.94	17.6216		1160.94	25.4
1161.42	17.6967		1161.42	25.67
1161.9	17.7775		1161.9	25.94
1162.38	17.8661		1162.38	26.23
1162.87	17.9617		1162.87	26.53
1163.35	18.0614		1163.35	26.83
1163.83	18.1612		1163.83	27.14
1164.31	18.2587		1164.31	27.44
1164.79	18.3537		1164.79	27.74
1165.28	18.4487		1165.28	28.05
1165.76	18.5468		1165.76	28.35
1166.24	18.6501		1166.24	28.66
1166.72	18.758		1166.72	28.98
1167.2	18.8677		1167.2	29.29
1167.69	18.9755		1167.69	29.59
1168.17	19.0791		1168.17	29.89
1168.65	19.1786		1168.65	30.18
1169.13	19.2766		1169.13	30.46
1169.62	19.3765		1169.62	30.73
1170.1	19.4805		1170.1	31.01
1170.58	19.5886		1170.58	31.28
1171.06	19.6985		1171.06	31.55
1171.54	19.807		1171.54	31.81
1172.03	19.9119		1172.03	32.07
1172.51	20.0133		1172.51	32.31
1172.99	20.1132		1172.99	32.55
1173.47	20.2143		1173.47	32.78
1173.95	20.3181		1173.95	33.01
1174.44	20.4243		1174.44	33.24
1174.92	20.5301		1174.92	33.46
1175.4	20.6325		1175.4	33.67
1175.88	20.7298		1175.88	33.88
1176.37	20.8225		1176.37	34.07
1176.85	20.9131		1176.85	34.26
1177.33	21.0051		1177.33	34.44
1177.81	21.1005		1177.81	34.62
1178.29	21.1994		1178.29	34.8
1178.78	21.2995		1178.78	34.97
1179.26	21.398		1179.26	35.14
1179.74	21.4929		1179.74	35.29
1180.22	21.5844		1180.22	35.45
1180.7	21.6749		1180.7	35.6
1181.19	21.7672		1181.19	35.76
1181.67	21.8633		1181.67	35.91
1182.15	21.9627		1182.15	36.07
1182.63	22.0635		1182.63	36.23
1183.11	22.1624		1183.11	36.38
1183.6	22.2574		1183.6	36.53
1184.08	22.3481		1184.08	36.68
1184.56	22.436		1184.56	36.82
1185.04	22.5234		1185.04	36.95
1185.53	22.6115		1185.53	37.09
1186.01	22.6999		1186.01	37.22
1186.49	22.7863		1186.49	37.35
1186.97	22.868		1186.97	37.47
1187.45	22.9435		1187.45	37.59
1187.94	23.0133		1187.94	37.7
1188.42	23.0795		1188.42	37.8
1188.9	23.1448		1188.9	37.9
1189.38	23.2109		1189.38	38.01
1189.86	23.2773		1189.86	38.11
1190.35	23.3419		1190.35	38.2
1190.83	23.4016		1190.83	38.3
1191.31	23.4547		1191.31	38.38
1191.79	23.5013		1191.79	38.46
1192.28	23.5434		1192.28	38.54
1192.76	23.5834		1192.76	38.61
1193.24	23.6233		1193.24	38.69
1193.72	23.663		1193.72	38.75
1194.2	23.7007		1194.2	38.82
1194.68	23.7343		1194.69	38.87
1195.17	23.7625		1195.17	38.92
1195.65	23.7857		1195.65	38.96
1196.13	23.8061		1196.13	38.99
1196.61	23.8264		1196.61	39.02
1197.1	23.8482		1197.1	39.05
1197.58	23.8715		1197.58	39.07
1198.06	23.8944		1198.06	39.09
1198.54	23.9146		1198.54	39.1
1199.02	23.9307		1199.02	39.1
1199.51	23.9434		1199.51	39.1
1199.99	23.9549		1199.99	39.09
1200.47	23.968		1200.47	39.08
1200.95	23.9846		1200.95	39.08
1201.43	24.0047		1201.44	39.07
1201.92	24.0264		1201.92	39.06
1202.4	24.0473		1202.4	39.04
1202.88	24.0659		1202.88	39.02
1203.36	24.0823		1203.36	39
1203.85	24.0988		1203.85	38.97
1204.33	24.118		1204.33	38.95
1204.81	24.1417		1204.81	38.92
1205.29	24.17		1205.29	38.9
1205.77	24.2013		1205.77	38.87
1206.26	24.2333		1206.26	38.85
1206.74	24.2644		1206.74	38.82
1207.22	24.2948		1207.22	38.79
1207.7	24.3262		1207.7	38.76
1208.18	24.3608		1208.18	38.74
1208.67	24.4		1208.67	38.72
1209.15	24.4432		1209.15	38.7
1209.63	24.4885		1209.63	38.68
1210.11	24.5333		1210.11	38.66
1210.6	24.5759		1210.6	38.65
1211.08	24.6164		1211.08	38.63
1211.56	24.6565		1211.56	38.61
1212.04	24.6983		1212.04	38.59
1212.52	24.7434		1212.52	38.58
1213.01	24.7914		1213.01	38.56
1213.49	24.8406		1213.49	38.55
1213.97	24.8888		1213.97	38.53
1214.45	24.9349		1214.45	38.51
1214.93	24.9792		1214.93	38.49
1215.42	25.0237		1215.42	38.46
1215.9	25.0706		1215.9	38.44
1216.38	25.1212		1216.38	38.42
1216.86	25.1751		1216.86	38.39
1217.35	25.2302		1217.35	38.37
1217.83	25.284		1217.83	38.34
1218.31	25.3349		1218.31	38.31
1218.79	25.383		1218.79	38.28
1219.27	25.4298		1219.27	38.24
1219.76	25.4773		1219.76	38.21
1220.24	25.527		1220.24	38.18
1220.72	25.5783		1220.72	38.14
1221.2	25.6297		1221.2	38.11
1221.68	25.6789		1221.68	38.06
1222.17	25.7247		1222.17	38.02
1222.65	25.7677		1222.65	37.97
1223.13	25.8095		1223.13	37.92
1223.61	25.8523		1223.61	37.87
1224.09	25.8974		1224.09	37.81
1224.58	25.9443		1224.58	37.76
1225.06	25.9912		1225.06	37.7
1225.54	26.0356		1225.54	37.64
1226.02	26.0763		1226.02	37.56
1226.51	26.1136		1226.51	37.49
1226.99	26.1491		1226.99	37.41
1227.47	26.1852		1227.47	37.33
1227.95	26.2232		1227.95	37.25
1228.43	26.2627		1228.43	37.17
1228.91	26.3021		1228.92	37.09
1229.4	26.3394		1229.4	37.01
1229.88	26.3732		1229.88	36.93
1230.36	26.4041		1230.36	36.84
1230.84	26.4338		1230.84	36.75
1231.33	26.4648		1231.33	36.66
1231.81	26.4984		1231.81	36.57
1232.29	26.5346		1232.29	36.49
1232.77	26.5717		1232.77	36.4
1233.26	26.6075		1233.26	36.32
1233.74	26.6409		1233.74	36.23
1234.22	26.6718		1234.22	36.15
1234.7	26.702		1234.7	36.07
1235.18	26.7335		1235.18	35.99
1235.66	26.7675		1235.67	35.92
1236.15	26.8042		1236.15	35.85
1236.63	26.8419		1236.63	35.79
1237.11	26.8791		1237.11	35.73
1237.59	26.9146		1237.59	35.67
1238.08	26.9488		1238.08	35.61
1238.56	26.9834		1238.56	35.56
1239.04	27.0201		1239.04	35.51
1239.52	27.0602		1239.52	35.47
1240	27.1031		1240	35.44
1240.49	27.147		1240.49	35.42
1240.97	27.1899		1240.97	35.4
1241.45	27.2305		1241.45	35.38
1241.93	27.2691		1241.93	35.37
1242.41	27.3071		1242.42	35.36
1242.9	27.3465		1242.9	35.36
1243.38	27.3885		1243.38	35.37
1243.86	27.4327		1243.86	35.38
1244.34	27.4778		1244.34	35.39
1244.83	27.5218		1244.83	35.41
1245.31	27.564		1245.31	35.42
1245.79	27.6049		1245.79	35.44
1246.27	27.6462		1246.27	35.46
1246.75	27.6901		1246.75	35.49
1247.24	27.7374		1247.24	35.52
1247.72	27.7879		1247.72	35.56
1248.2	27.8397		1248.2	35.6
1248.68	27.8909		1248.68	35.64
1249.16	27.9403		1249.16	35.68
1249.65	27.9882		1249.65	35.73
1250.13	28.0362		1250.13	35.77
1250.61	28.0862		1250.61	35.83
1251.09	28.1395		1251.09	35.89
1251.58	28.1955		1251.58	35.96
1252.06	28.2528		1252.06	36.03
1252.54	28.3094		1252.54	36.1
1253.02	28.3644		1253.02	36.17
1253.5	28.4181		1253.5	36.24
1253.98	28.4722		1253.99	36.31
1254.47	28.5286		1254.47	36.39
1254.95	28.5887		1254.95	36.46
1255.43	28.652		1255.43	36.54
1255.91	28.7171		1255.91	36.62
1256.4	28.782		1256.4	36.69
1256.88	28.8457		1256.88	36.77
1257.36	28.9083		1257.36	36.84
1257.84	28.9714		1257.84	36.91
1258.33	29.0365		1258.33	36.99
1258.81	29.1048		1258.81	37.06
1259.29	29.1755		1259.29	37.14
1259.77	29.2469		1259.77	37.23
1260.25	29.317		1260.25	37.31
1260.73	29.3849		1260.74	37.38
1261.22	29.4509		1261.22	37.46
1261.7	29.5168		1261.7	37.54
1262.18	29.5848		1262.18	37.62
1262.66	29.6561		1262.66	37.71
1263.15	29.7303		1263.15	37.79
1263.63	29.8058		1263.63	37.88
1264.11	29.8807		1264.11	37.96
1264.59	29.9533		1264.59	38.04
1265.07	30.0238		1265.07	38.12
1265.56	30.0932		1265.56	38.19
1266.04	30.163		1266.04	38.27
1266.52	30.2344		1266.52	38.35
1267	30.3072		1267	38.42
1267.48	30.3802		1267.49	38.5
1267.97	30.452		1267.97	38.58
1268.45	30.5217		1268.45	38.65
1268.93	30.5895		1268.93	38.73
1269.41	30.6565		1269.41	38.8
1269.89	30.7238		1269.9	38.88
1270.38	30.7919		1270.38	38.96
1270.86	30.8603		1270.86	39.05
1271.34	30.9276		1271.34	39.14
1271.82	30.9924		1271.82	39.22
1272.31	31.0542		1272.31	39.3
1272.79	31.1137		1272.79	39.38
1273.27	31.1725		1273.27	39.46
1273.75	31.2327		1273.75	39.54
1274.23	31.2951		1274.23	39.62
1274.72	31.3596		1274.72	39.7
1275.2	31.4249		1275.2	39.78
1275.68	31.4894		1275.68	39.85
1276.16	31.5521		1276.16	39.92
1276.64	31.6129		1276.65	39.98
1277.13	31.673		1277.13	40.05
1277.61	31.7334		1277.61	40.11
1278.09	31.7949		1278.09	40.18
1278.57	31.8573		1278.57	40.25
1279.06	31.9194		1279.06	40.31
1279.54	31.9801		1279.54	40.38
1280.02	32.0387		1280.02	40.44
1280.5	32.0958		1280.5	40.5
1280.98	32.1525		1280.98	40.56
1281.47	32.2103		1281.47	40.62
1281.95	32.2697		1281.95	40.68
1282.43	32.3304		1282.43	40.73
1282.91	32.3911		1282.91	40.79
1283.39	32.4506		1283.4	40.83
1283.88	32.5078		1283.88	40.87
1284.36	32.563		1284.36	40.91
1284.84	32.617		1284.84	40.94
1285.32	32.671		1285.32	40.97
1285.81	32.7253		1285.81	40.99
1286.29	32.7792		1286.29	41.02
1286.77	32.8313		1286.77	41.04
1287.25	32.8798		1287.25	41.05
1287.73	32.9237		1287.73	41.06
1288.22	32.9632		1288.22	41.07
1288.7	32.9991		1288.7	41.07
1289.18	33.0329		1289.18	41.08
1289.66	33.0656		1289.66	41.08
1290.14	33.0971		1290.14	41.09
1290.63	33.1267		1290.63	41.09
1291.11	33.1536		1291.11	41.09
1291.59	33.1772		1291.59	41.08
1292.07	33.1979		1292.07	41.07
1292.56	33.2167		1292.56	41.06
1293.04	33.235		1293.04	41.04
1293.52	33.2534		1293.52	41.03
1294	33.2716		1294	41.01
1294.48	33.2886		1294.48	40.98
1294.96	33.3029		1294.97	40.95
1295.45	33.3137		1295.45	40.92
1295.93	33.321		1295.93	40.88
1296.41	33.3256		1296.41	40.85
1296.89	33.3289		1296.89	40.81
1297.38	33.3317		1297.38	40.78
1297.86	33.3341		1297.86	40.75
1298.34	33.3353		1298.34	40.72
1298.82	33.3344		1298.82	40.69
1299.3	33.3308		1299.3	40.66
1299.79	33.3246		1299.79	40.63
1300.27	33.3168		1300.27	40.61
1300.75	33.3084		1300.75	40.59
1301.23	33.3001		1301.23	40.56
1301.71	33.2915		1301.72	40.54
1302.2	33.2817		1302.2	40.52
1302.68	33.2692		1302.68	40.49
1303.16	33.2534		1303.16	40.46
1303.64	33.2343		1303.64	40.43
1304.13	33.2129		1304.13	40.4
1304.61	33.1906		1304.61	40.37
1305.09	33.168		1305.09	40.34
1305.57	33.1448		1305.57	40.32
1306.05	33.1199		1306.05	40.29
1306.54	33.0916		1306.54	40.27
1307.02	33.0586		1307.02	40.24
1307.5	33.0208		1307.5	40.22
1307.98	32.9793		1307.98	40.2
1308.46	32.9359		1308.47	40.18
1308.95	32.8924		1308.95	40.16
1309.43	32.8493		1309.43	40.15
1309.91	32.8064		1309.91	40.14
1310.39	32.7623		1310.39	40.13
1310.88	32.7157		1310.88	40.12
1311.36	32.6657		1311.36	40.1
1311.84	32.612		1311.84	40.08
1312.32	32.5547		1312.32	40.06
1312.8	32.4944		1312.8	40.04
1313.29	32.4312		1313.29	40.01
1313.77	32.3648		1313.77	39.99
1314.25	32.2953		1314.25	39.95
1314.73	32.223		1314.73	39.92
1315.21	32.1491		1315.21	39.88
1315.7	32.0751		1315.7	39.85
1316.18	32.0022		1316.18	39.82
1316.66	31.9305		1316.66	39.79
1317.14	31.8591		1317.14	39.76
1317.62	31.7856		1317.63	39.74
1318.11	31.7081		1318.11	39.71
1318.59	31.6258		1318.59	39.67
1319.07	31.5399		1319.07	39.63
1319.55	31.4538		1319.55	39.6
1320.04	31.3716		1320.04	39.56
1320.52	31.2966		1320.52	39.53
1321	31.2308		1321	39.5
1321.48	31.174		1321.48	39.47
1321.96	31.1252		1321.96	39.44
1322.45	31.0836		1322.45	39.4
1322.93	31.0494		1322.93	39.37
1323.41	31.024		1323.41	39.34
1323.89	31.0094		1323.89	39.32
1324.38	31.007		1324.38	39.3
1324.86	31.017		1324.86	39.29
1325.34	31.0386		1325.34	39.29
1325.82	31.0703		1325.82	39.29
1326.3	31.1111		1326.3	39.3
1326.79	31.161		1326.79	39.31
1327.27	31.2209		1327.27	39.33
1327.75	31.2919		1327.75	39.36
1328.23	31.374		1328.23	39.4
1328.71	31.4658		1328.71	39.43
1329.2	31.565		1329.2	39.47
1329.68	31.6685		1329.68	39.51
1330.16	31.7745		1330.16	39.55
1330.64	31.8819		1330.64	39.58
1331.12	31.9912		1331.12	39.61
1331.61	32.1026		1331.61	39.65
1332.09	32.2164		1332.09	39.68
1332.57	32.3312		1332.57	39.71
1333.05	32.4456		1333.05	39.74
1333.54	32.5577		1333.54	39.77
1334.02	32.6668		1334.02	39.8
1334.5	32.7732		1334.5	39.83
1334.98	32.8781		1334.98	39.86
1335.46	32.983		1335.46	39.89
1335.94	33.0889		1335.95	39.93
1336.43	33.1952		1336.43	39.97
1336.91	33.3		1336.91	40.01
1337.39	33.4007		1337.39	40.05
1337.87	33.4942		1337.87	40.08
1338.36	33.5776		1338.36	40.11
1338.84	33.6488		1338.84	40.13
1339.32	33.7069		1339.32	40.14
1339.8	33.7521		1339.8	40.15
1340.28	33.7863		1340.28	40.15
1340.77	33.8121		1340.77	40.15
1341.25	33.833		1341.25	40.14
1341.73	33.8523		1341.73	40.12
1342.21	33.8728		1342.21	40.1
1342.69	33.8962		1342.7	40.08
1343.18	33.9231		1343.18	40.06
1343.66	33.9529		1343.66	40.04
1344.14	33.9836		1344.14	40.02
1344.62	34.0132		1344.62	40
1345.11	34.0397		1345.11	39.98
1345.59	34.0624		1345.59	39.95
1346.07	34.0818		1346.07	39.92
1346.55	34.099		1346.55	39.88
1347.03	34.1151		1347.03	39.85
1347.52	34.1305		1347.52	39.81
1348	34.1444		1348	39.78
1348.48	34.1556		1348.48	39.73
1348.96	34.1626		1348.96	39.68
1349.44	34.165		1349.45	39.62
1349.93	34.1636		1349.93	39.56
1350.41	34.1602		1350.41	39.49
1350.89	34.1569		1350.89	39.42
1351.37	34.1554		1351.37	39.35
1351.86	34.1558		1351.86	39.28
1352.34	34.1575		1352.34	39.21
1352.82	34.1588		1352.82	39.13
1353.3	34.1584		1353.3	39.05
1353.78	34.1555		1353.78	38.97
1354.27	34.1501		1354.27	38.89
1354.75	34.143		1354.75	38.81
1355.23	34.1349		1355.23	38.73
1355.71	34.1261		1355.71	38.65
1356.19	34.1166		1356.19	38.57
1356.68	34.1059		1356.68	38.49
1357.16	34.0943		1357.16	38.41
1357.64	34.0824		1357.64	38.33
1358.12	34.0718		1358.12	38.25
1358.61	34.0645		1358.61	38.18
1359.09	34.0616		1359.09	38.1
1359.57	34.0634		1359.57	38.03
1360.05	34.0684		1360.05	37.96
1360.53	34.0735		1360.53	37.88
1361.02	34.0745		1361.02	37.79
1361.5	34.0667		1361.5	37.69
1361.98	34.0467		1361.98	37.58
1362.46	34.0134		1362.46	37.46
[truncated: 5,471 more rows]

## Sheet: Body weight of mice
	Con										Mod										Pos										L-UFSDF										H-UFSDF
	1	2	3	4	5	6	7	8	9	10	1	2	3	4	5	6	7	8	9	10	1	2	3	4	5	6	7	8	9	10	1	2	3	4	5	6	7	8	9	10	1	2	3	4	5	6	7	8	9
0d	34.2	33.6	33.5	32.4	35.6	33.2	32.5	33.7	33.6	35.8	34	36	33	34	36	30	33	35	32	33	32	31	35	32	34	31	34	30	33	31	34	33	33	34	35	35	31	34	31	32	33	29	33	34	35	34	35	33	33
1d	35.4	34.3	35.7	33.2	37.1	34.4	33.3	34.3	34.4	38.7	35	36	34	34	36	30	34	34	31	33	33	32	35	33	34	31	34	30	34	31	34	32	32	34	34	32	31	29	33	33	35	33	30	31	30	33	34	34	35
2d	37.7	35.7	36.9	34.4	38.6	36.4	35.2	35.4	35.7	38.4	36	37	36	35	37	31	36	37	34	34	35	34	36	36	38	34	35	32	36	33	36	35	35	36	35	36	34	30	35	35	37	35	32	32	32	35	35	34	36
3d	38.4	36.8	38.4	34.9	39.8	37.5	36.8	36.7	36.4	39.2	38	38	38	36	38	33	38	38	34	36	37	36	37	36	39	36	37	35	37	34	38.4	37	36.3	37	38.1	37.4	35.4	32.4	36.6	37.8	39	37	33	34	34	37	37	36	38
4d	39.7	37.6	39.2	35.4	40.9	38.8	37.7	37.4	37.3	39.5	38	38.3	37	37.4	37.8	32	37	37.4	34.8	36.6	37	36	38	37	39	37	38	34	37	36.6	38.3	37	35.1	38.8	37	37.3	37.4	34.1	37.4	37.1	40	38	34	35	34	36	36	36	39
5d	40.3	38.6	39.8	36.1	41.6	39.2	38.6	38.7	37.7	40.5	37.1	37.6	36.5	36.9	37.6	32.4	36.5	36.8	35.1	37	37.7	37.2	39.2	38.2	41.3	38.5	37.4	35	38.2	37.1	38.1	38.1	35.6	38.3	37.9	38.2	36.3	33	37.2	37.1	39.4	38.6	33.8	36.1	34.9	36.4	37.4	37.3	40
6d	40	38.9	40.9	36.2	42.2	39	38.6	38.5	37.9	40.7	37.8	37.1	36.6	36.1	35.7	32.1	36.6	36.4	34.8	36.5	37.8	37.6	38.6	38	41.1	38.2	37.1	36.4	38.1	36.9	38.6	37.6	35.5	38.2	36.8	38	36.5	32.9	37	36.8	39.1	37.9	33.7	36	34.8	35.9	37.1	37.2	39.2
7d	41.2	40.4	40.6	37.3	43.2	40.8	40.2	40.5	39.3	41.6	37.4	36.5	36.1	35.8	34.9	31.4	36.1	37.1	34.3	36.2	36.7	37.4	38.1	37.7	41.4	37.6	37	33.2	38.1	36.4	38.3	37.4	35.1	38.1	36.4	37.6	36.1	31.4	36.9	36.4	40.7	36.3	33.6	35.9	37.5	35.4	36.3	37.1	38.7
8d	41.7	40.5	41.3	37.7	44.1	40.3	40.8	40.8	38.9	41.7	37.1	36.2	37.6	37.5	33.6	30.9	37.6	37.8	35.1	37.4	37.3	38.5	39.2	38.9	41.7	39.1	38.5	36.1	39.9	37	40.4	38.7	36.6	39.3	38.1	39.7	37.4	33.4	37.2	38.6	42.3	38.8	36.1	39	38	37.8	33.8	37.6	41.1
9d	42.3	41.4	41.5	38.7	44.7	41.7	40.2	40.9	39.4	41.9	37.7	37.7	37.8	37.6	33.4	33.3	37.8	36.4	35	37.3	36.9	37.8	40.3	39.3	38.2	41	38.6	31.8	38.7	36.5	41.2	40.6	37.3	41.4	38.5	40.3	39.2	35.5	38.2	38.8	43.1	40.3	36.7	40.5	38.7	39.5	32.7	38.7	40.1
10d	43.3	41.8	42.2	39.4	45.3	41.8	40.7	41	40.7	42.3	38.8	37.8	37.7	37.4	35.4	33.5	37.7	35.8	36.4	37.5	37.4	38.7	40.6	39.4	39.2	40.9	38.9	31.6	39.3	37.4	42.1	41.1	37.3	42	38.8	40.9	39	35.6	38.9	39.2	42.7	40.9	37.3	40.1	39.4	40.3	31.9	38.9	41.2
11d	43.2	42.1	42.5	39.4	45	41.2	41.5	41.8	41	42.6	38.9	38.2	38.4	39.6	37.2	35.4	37.9	37.1	37.6	37.7	38.1	39.9	42.4	41	41.8	41.9	40.3	33.7	40.3	38.6	42.6	41.9	37.6	43.2	39.4	42.3	40.2	35.8	39.6	40.1	43.8	41	37.9	40.5	39.6	40.1	32	39.7	42.4
12d	45.4	44	44.5	41.4	45.8	43	43.1	42.5	43.4	43.5	39.2	39.5	41.3	40.4	38.9	35.8	38.4	38.7	38.9	38.2	38.8	41.2	42.8	42.6	43.5	41.5	40.4	36.2	40.7	38.9	44.8	43.8	38.5	43.9	40.3	44.3	40.2	36.8	40.6	42.5	44.9	42.6	39.5	42.2	41.3	42.3	38	40.5	44.8
13d	46	43.9	44.7	42.6	46.9	43	43.2	43	43.4	43.9	40.3	40.1	41.6	41.7	41.7	37	38.6	38.8	39.4	39.1	39.8	41.2	43.8	42.6	43.8	43.4	42	38.4	42.2	40.7	44.8	44.6	38.7	45.2	40.8	44.7	42.5	38	42	42	45.7	42.4	39.3	41.9	40.7	41.7	39.2	40.8	46
14d	46.2	44.5	45.4	43.4	48.2	44.3	43.9	44.1	43.8	43.3	41.7	41.9	41.9	42.6	41.1	36.3	39.2	38.7	39.5	39.4	39.6	42.7	44	43.1	43.6	42.1	40.9	38.9	41.5	39.6	44.4	44.3	38.5	44.8	40.9	44.5	41.9	37.8	42.1	43.2	46.5	43.4	39.8	42.7	41.1	42.9	39	40.9	45.6
[truncated: 21 more columns]

## Sheet: DAI
	Con										Mod										Pos										L-UFSDF										H-UFSDF
	1	2	3	4	5	6	7	8	9	10	1	2	3	4	5	6	7	8	9	10	1	2	3	4	5	6	7	8	9	10	1	2	3	4	5	6	7	8	9	10	1	2	3	4	5	6	7	8	9
1d	0	0	0	0	0	0	0	0	0	0	0.666667	1	0.666667	0.333333	0.666667	0.666667	0.333333	1	0.33	0.666667	0.333333	0.333333	0	0.333333	0.333333	0	0.333333	0.333333	0.666667	0	0.333333	0.333333	0.333333	0.333333	0.333333	0.333333	0.333333	0.333333	0.333333	0.333333	0.333333	0.666667	0.333333	0	0.333333	0.333333	0.333333	0.666667	0.666667
2d	0	0	0	0	0	0	0	0	0	0	0.666667	1.33333	1.33333	1.66667	1.66667	2.66667	2.33333	1.33333	0.67	0.666667	1	0.666667	0.333333	0.666667	0.666667	0.333333	0.666667	0.666667	0.333333	0.333333	0.666667	0.666667	0.333333	0.666667	0.666667	0.666667	0.666667	0.333333	0.666667	0.666667	1	0.666667	0.666667	1	0.666667	0.666667	0.666667	0.666667	0.666667
3d	0	0	0	0	0	0	0	0	0	0	1.33333	2.33333	2.33333	2.66667	0.666667	1.66667	0.33	0.666667	0.666667	1.33333	0.666667	1	0.666667	1	1	1.33333	0.666667	0.666667	1	1	1	0.666667	0.666667	0.666667	1.33333	1.33333	0.666667	0.666667	0.666667	0.666667	1.66667	1	0.666667	0.666667	0.333333	0.666667	1.33333	0.666667	1.33333
4d	0	0	0	0	0	0	0	0	0	0	1.66667	1.66667	1.33333	2	1	1.66667	1	1.66667	1	1.33333	1.33333	1	0.666667	0.666667	1.33333	1	0.666667	0.666667	1	0.666667	1	1	2	2	1.33333	1	1.33333	1	1.33333	1.33333	2	1.33333	1.33333	1	1.66667	1.33333	1.33333	1	1.66667
5d	0	0	0	0	0	0	0	0	0	0	1.66667	2	1.66667	2	1.33333	1.33333	1.33333	1.33333	1.33333	1.66667	1	1.66667	1.33333	1.33333	1	1.33333	1.66667	1	1	1	1	1	0.666667	1.66667	1.33333	1.33333	1.33333	0.666667	1	1	2	1.66667	1	1.66667	1.33333	1.66667	1.66667	1	1.33333
6d	0	0	0	0	0	0	0	0	0	0	2.33333	2.33333	1.33333	1.33333	1.66667	1.66667	2.66667	2.66667	1.66667	1.66667	1.33333	1	1.33333	2.33333	1.66667	2	1.33333	1.33333	2	1.33333	0.666667	0.666667	1.33333	1.66667	1.33333	2	2.66667	1.66667	1.66667	1.66667	1.66667	2	0.666667	1.33333	1	1.66667	2.66667	1	2
7d	0	0	0	0	0	0	0	0	0	0	2.66667	2.66667	2.66667	2.66667	2.66667	1.66667	2.66667	2.66667	2.66667	2.66667	1.66667	1.66667	1.33333	2.66667	2.33333	2.66667	1.33333	2.33333	2	2.33333	1	1	1.66667	2	1.66667	1.33333	2.66667	2.33333	2.33333	2	2.66667	2	2	2	2	1.66667	2.66667	2	2.33333
8d	0	0	0	0	0	0	0	0	0	0	2.66667	1.66667	2.33333	2.33333	2.33333	2.33333	2.33333	2.33333	1.66667	2.33333	1.66667	1.66667	1	2.33333	2.33333	2.33333	1.66667	1.66667	2.33333	2.33333	2.33333	1.66667	1.66667	2.33333	1	1.66667	2.33333	2.33333	2.33333	2.33333	2.33333	1.66667	2.33333	1.66667	1.66667	2.33333	2.33333	1.66667	1.66667
9d	0	0	0	0	0	0	0	0	0	0	1.66667	1	1	2.33333	1.66667	1.33333	2.33333	1.66667	1.66667	1.33333	1	1	1.66667	2.33333	1	2.33333	1	0.666667	1.66667	1	1	1	1	1.66667	1	0.666667	2.33333	0.666667	1	1.66667	1	1	0.666667	0	1	0.666667	0.666667	1.66667	2
10d	0	0	0	0	0	0	0	0	0	0	1	1	1	1	1.66667	1.66667	1.66667	1.66667	1	1	1	1	0.333333	1.66667	1.66667	1	1	0.666667	1	1.66667	1	1	1	1.66667	1	1	1.66667	1	1	1	1	1	0	0	1	1	0.666667	1	1
11d	0	0	0	0	0	0	0	0	0	0	1	1.33333	1	1.66667	1.33333	1	1.66667	1.66667	1.33333	1	1	1	0.333333	1.33333	1	1	1	1	1	0.333333	1.33333	1	1	1	1	0.666667	1.66667	1	1	1.66667	1	1	1	0	0.333333	0	1	1	1
12d	0	0	0	0	0	0	0	0	0	0	1.66667	1	1	2	1	1	1.33333	1.33333	1.33333	1	0.666667	0	0.666667	1	1	1	0.666667	1	0.666667	0.333333	0.666667	1.33333	0.666667	0.333333	0.333333	0.333333	1.66667	0.666667	0.666667	1	0	0.666667	0.333333	0.666667	0.666667	0.666667	1	0.666667	0.666667
13d	0	0	0	0	0	0	0	0	0	0	1.66667	1.33333	1.33333	1	1.33333	1	1	1	1	1	0.666667	0.666667	0.666667	0.333333	0	1	1	0.666667	0.666667	0.666667	1.33333	0.666667	0.666667	1.33333	0.666667	0.666667	1	0.666667	1	0.333333	0.666667	0.666667	0.333333	0	0.333333	0.333333	0.333333	0.666667	1.33333
14d	0	0	0	0	0	0	0	0	0	0	1.33333	1	1.33333	1	1.33333	1	0.666667	1.33333	1	1	0	1	0.333333	0.333333	0.666667	1	0.333333	0.333333	0.333333	0.666667	0.666667	0.333333	0.333333	0.666667	0.333333	0.333333	1	0.666667	0.333333	0.666667	1	0.333333	0.666667	0	0	1	0	0.333333	1
[truncated: 21 more columns]

## Sheet: Colon length
Groups	Numbers	Colon length(cm)
Con	1	9
	2	9.2
	3	11
	4	12.3
	5	12
	6	11
	7	12
	8	13
Mod	1	9.5
	2	9
	3	7
	4	9
	5	9
	6	9.5
	7	5.9
	8	9
Pos	1	10.5
	2	11.5
	3	11.5
	4	11.5
	5	10
	6	11
	7	11
	8	11.5
L-UFSDF	1	11
	2	10
	3	10
	4	10
	5	10.8
	6	9
	7	11.2
	8	11.5
H-UFSDF	1	10
	2	10.4
	3	11
	4	10.5
	5	13
	6	10
	7	12
	8	11.8
L-FSDF	1	11
	2	11
	3	11
	4	11.2
	5	12
	6	12
	7	10.6
	8	11
H-FSDF	1	10
	2	12
	3	11.5
	4	10.5
	5	10.5
	6	10
	7	11
	8	11.5

## Sheet: Spleen Index
Groups	Numbers	Spleen Index (mg/g)
Con	1	2.82031
	2	2.31973
	3	3.24612
	4	3.85219
	5	2.49881
	6	2.95128
	7	3.74171
	8	2.73502
Mod	1	4.61098
	2	5.60732
	3	5.11011
	4	8.85266
	5	5.41905
	6	9.23224
	7	8.21067
	8	6.76157
Pos	1	4.42424
	2	3.55504
	3	4.24932
	4	4.48485
	5	3.65596
	6	3.59145
	7	3.37727
	8	3.4473
L-UFSDF	1	3.41441
	2	3.15691
	3	5.35193
	4	3.71046
	5	4.40909
	6	3.71463
	7	4.87831
	8	4.51699
H-UFSDF	1	2.97847
	2	3.41753
	3	3.11601
	4	4.21359
	5	3.79369
	6	3.34066
	7	3.25926
	8	3.41152
L-FSDF	1	3.39671
	2	2.87651
	3	3.46563
	4	3.10755
	5	3.45183
	6	3.06074
	7	2.92857
	8	3.20098
H-FSDF	1	3.02709
	2	4.49337
	3	4.69211
	4	4.31105
	5	3.58128
	6	4.53691
	7	4.20449
	8	4.48333

## Sheet: ELISA
TNF-α				IL-1β
Groups	Number	TNF-α (pg/mL)		Groups	Number	IL-1β (pg/mL)
Con	1	112.59		Con	1	428.29
	2	111.92			2	399.71
	3	132.86			3	397.33
	4	123.41			4	437.21
Mod	1	239.62		Mod	1	658.05
	2	193.68			2	657.45
	3	173.41			3	673.52
	4	182.86			4	672.33
Pos	1	120.7		Pos	1	489.6
	2	109.22			2	421.74
	3	124.41			3	451.5
	4	99.08			4	455.67
L-UFSDF	1	124.08		L-UFSDF	1	478.29
	2	111.24			2	457.45
	3	120.03			3	514
	4	132.19			4	441.38
H-UFSDF	1	147.73		H-UFSDF	1	421.74
	2	131.51			2	452.69
	3	107.86			3	424.12
	4	153.14			4	471.14
L-FSDF	1	82.19		L-FSDF	1	424.71
	2	93			2	544.36
	3	90.3			3	519.36
	4	111.24			4	555.07
H-FSDF	1	88.95		H-FSDF	1	490.19
	2	89.62			2	447.93
	3	86.92			3	496.74
	4	91.65			4	497.33
IL-6				IL-10
Groups	Number	IL-6 (pg/mL)		Groups	Number	IL-10 (pg/mL)
Con	1	257.98		Con	1	1262.12
	2	360.54			2	1233.17
	3	381.42			3	1262.78
	4	276.11			4	1275.28
Mod	1	695.89		Mod	1	676.59
	2	607.79			2	731.2
	3	598.82			3	751.59
	4	604.13			4	584.49
Pos	1	413.11		Pos	1	1144.36
	2	420.25			2	1289.75
	3	426.11			3	1198.3
	4	429.22			4	1278.57
L-UFSDF	1	324.28		L-UFSDF	1	1229.88
	2	320.98			2	1140.41
	3	339.3			3	1083.17
	4	337.47			4	1123.3
H-UFSDF	1	305.05		H-UFSDF	1	1093.7
	2	316.4			2	1159.49
	3	281.6			3	1053.57
	4	300.1			4	1165.41
L-FSDF	1	280.69		L-FSDF	1	1101.59
	2	253.22			2	975.28
	3	250.29			3	1010.14
	4	225.38			4	968.04
H-FSDF	1	221.35		H-FSDF	1	1303.57
	2	220.62			2	1254.22
	3	211.82			3	1339.75
	4	248.09			4	1264.75

## Sheet: alpha_diversity
Sample Name	simpson	chao1	ACE
Nor.2.1	0.976	516.109	522.483
Nor.2.5	0.979	1279.17	1215.23
Nor.2.6	0.977	1245.5	1262.19
Mod.1.6	0.943	850.079	914.875
Mod.2.2	0.96	602.891	624.121
Mod.2.4	0.883	690.59	668.034
Pos.1.3	0.952	1177.57	1236.8
Pos.1.5	0.952	794.439	874.882
Pos.2.1	0.947	626.839	700.725
L.UFSDF.1.2	0.958	1318.87	1410.96
L.UFSDF.1.5	0.958	1443.55	1539.12
L.UFSDF.2.4	0.952	1293.69	1346.03
H.UFSDF.1.2	0.959	1416.13	1452.39
H.UFSDF.2.2	0.973	957.514	1033.94
H.UFSDF.2.3	0.963	1316.7	1426.28
L.FSDF.1.1	0.977	1559.01	1612.29
L.FSDF.1.4	0.933	1425.09	1545.34
L.FSDF.2.3	0.94	1297.02	1378.05
H.FSDF.1.3	0.908	1039.88	1133.04
H.FSDF.1.4	0.936	1337.96	1369.53
H.FSDF.2.4	0.947	973.348	1059.88

[truncated: 6 more sheets: pcoa_otu_bray_curt, nmds_otu_bray_curt, all sample.phylum.bar, all sample.family.bar, heatm_otu_genus, SCFA]
