# Supplementary material for: Soluble dietary fibers from solid-state fermentation of wheat bran by the fungus Cordyceps cicadae and their effects on colitis mice
Source: Royal Society of Chemistry journal article supplement (doi:10.1039/d3fo03851c), 2023-12-11
Supplement: d3fo03851c2.pdf [file d3fo03851c2.pdf]

## Supplementary Information

### **Soluble dietary fiber from solid-state fermentation of wheat bran by fungus**

#### ***Cordyceps cicadae* and their effects on colitis mice**

Hua Wang<sup>a</sup>, Menglin Li<sup>a</sup>, Furong Jiao<sup>a</sup>, Wenxiu Ge<sup>a</sup>, Rui Liu<sup>a,\*</sup>, Zijian Zhi<sup>b,\*</sup>, Tao Wu<sup>a</sup>, Wenjie Sui<sup>a</sup>, Min Zhang<sup>a,c</sup>.

<sup>a</sup>State Key Laboratory of Food Nutrition and Safety, Tianjin University of Science & Technology, Tianjin, 300457, China

<sup>b</sup>Food Structure and Function (FSF) Research Group, Department of Food Technology, Safety and Health, Faculty of Bioscience Engineering, Ghent University, Coupure Links 653, 9000 Gent, Belgium

<sup>c</sup>China-Russia Agricultural Processing Joint Laboratory, Tianjin Agricultural University, Tianjin 300392, PR China

Corresponding Author:

\*Rui Liu

Email: lr@tust.edu.cn

<https://orcid.org/0000-0002-8534-2071>

\*Zijian Zhi

Email: zijian.zhi@ugent.be

**Table S1** The evaluation standards of disease activity index.

| Score | Weight Loss | Fecal viscosity | Fecal bleeding                 |
|-------|-------------|-----------------|--------------------------------|
| 0     | 0           | Normal          | Normal                         |
| 1     | 1-5%        | Slightly soft   | Occult blood and weak positive |
| 2     | 5-10%       | Soft            | Occult blood and positive      |
| 3     | 10-20%      | Mucoid stool    | Visible blood                  |
| 4     | >20%        | Watery stool    | Perianal hemorrhage            |

**Table S2** The standards of histopathological evaluation.

| Score | Inflammatory Cell<br>Infiltration | Epithelial Cell<br>Destruction | Crypt Loss         |
|-------|-----------------------------------|--------------------------------|--------------------|
| 0     | Normal                            | Normal                         | Normal             |
| 1     | Local infiltration                | Minor damage                   | Partial absence    |
| 2     | Moderate infiltration             | Moderate damage                | Large area missing |
| 4     | Severe infiltration               | Serious damage                 | No crypt structure |

**Table S3** The chemical properties of UFSDF and FSDF.

| Main components                | UFSDF      | FSDF       |
|--------------------------------|------------|------------|
| Total sugar (%)                | 58.56±1.59 | 63.83±1.52 |
| Reducing sugar (%)             | 0.51±0.21  | 2.21±0.22  |
| Protein (%)                    | 8.49±0.60  | 3.06±0.15  |
| Uronic acid (%)                | 4.10±0.27  | 10.30±0.37 |
| Monosaccharide composition (%) |            |            |
| Mannose                        | 1.45       | 31.93      |
| Rhamnose                       | 1.68       | 0.70       |
| Glucuronic acid                | 1.04       | 9.50       |
| Galacturonic acid              | 0.90       | 0.70       |
| Glucose                        | 34.33      | 17.94      |
| Galactose                      | 3.23       | 35.55      |
| Xylose                         | 27.26      | -          |
| Arabinose                      | 30.26      | 3.35       |

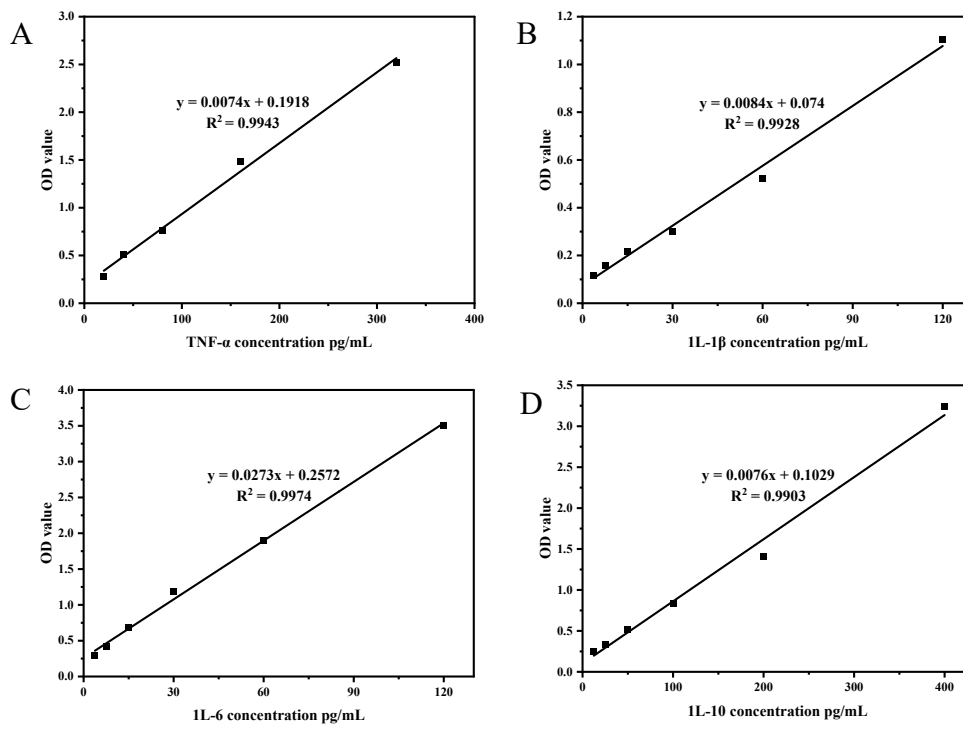

**Fig. S1.** Standard curves for different inflammatory cytokines (A) TNF- $\alpha$ , (B) IL-1 $\beta$ , (C) IL-6, (D) IL-10.

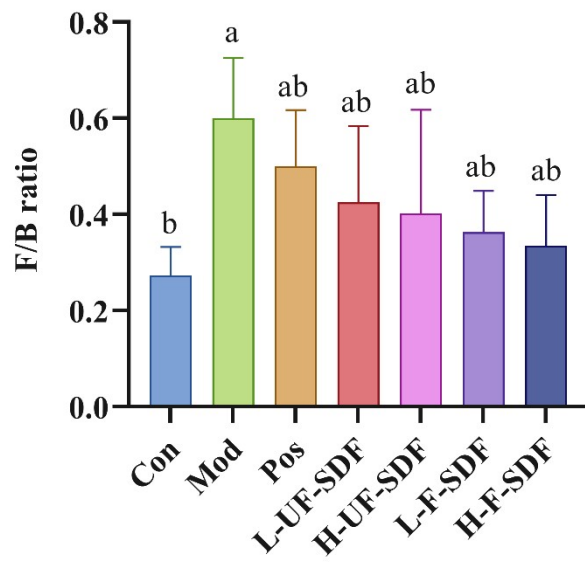

**Fig. S2.** The *Firmicutes/Bacteroidetes* (F/B) ratio

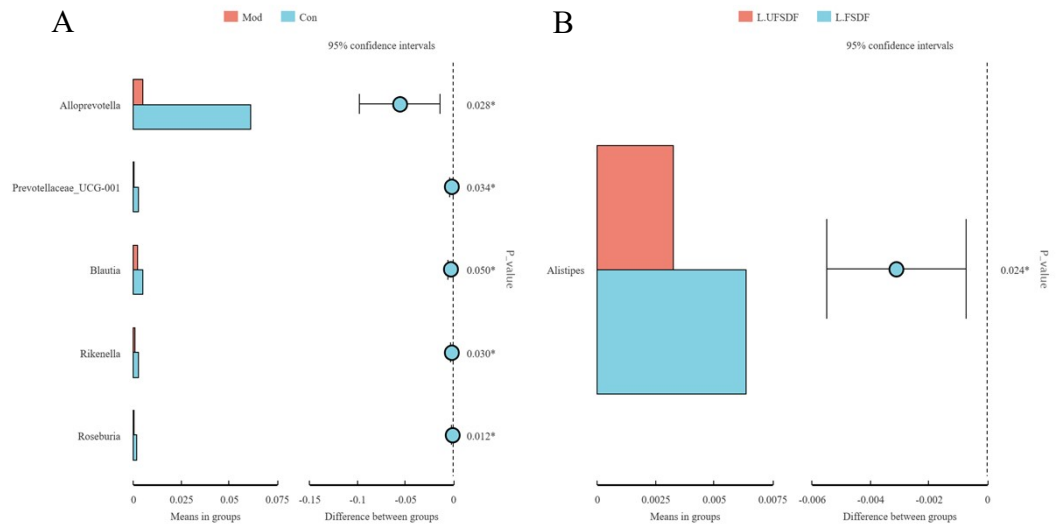

**Fig. S3.** The T-test analysis-identified bacteria with significant changes at the genus level: (A) Con versus Mod group and (B) L-UFSDF versus L-FSDF group (n=3).

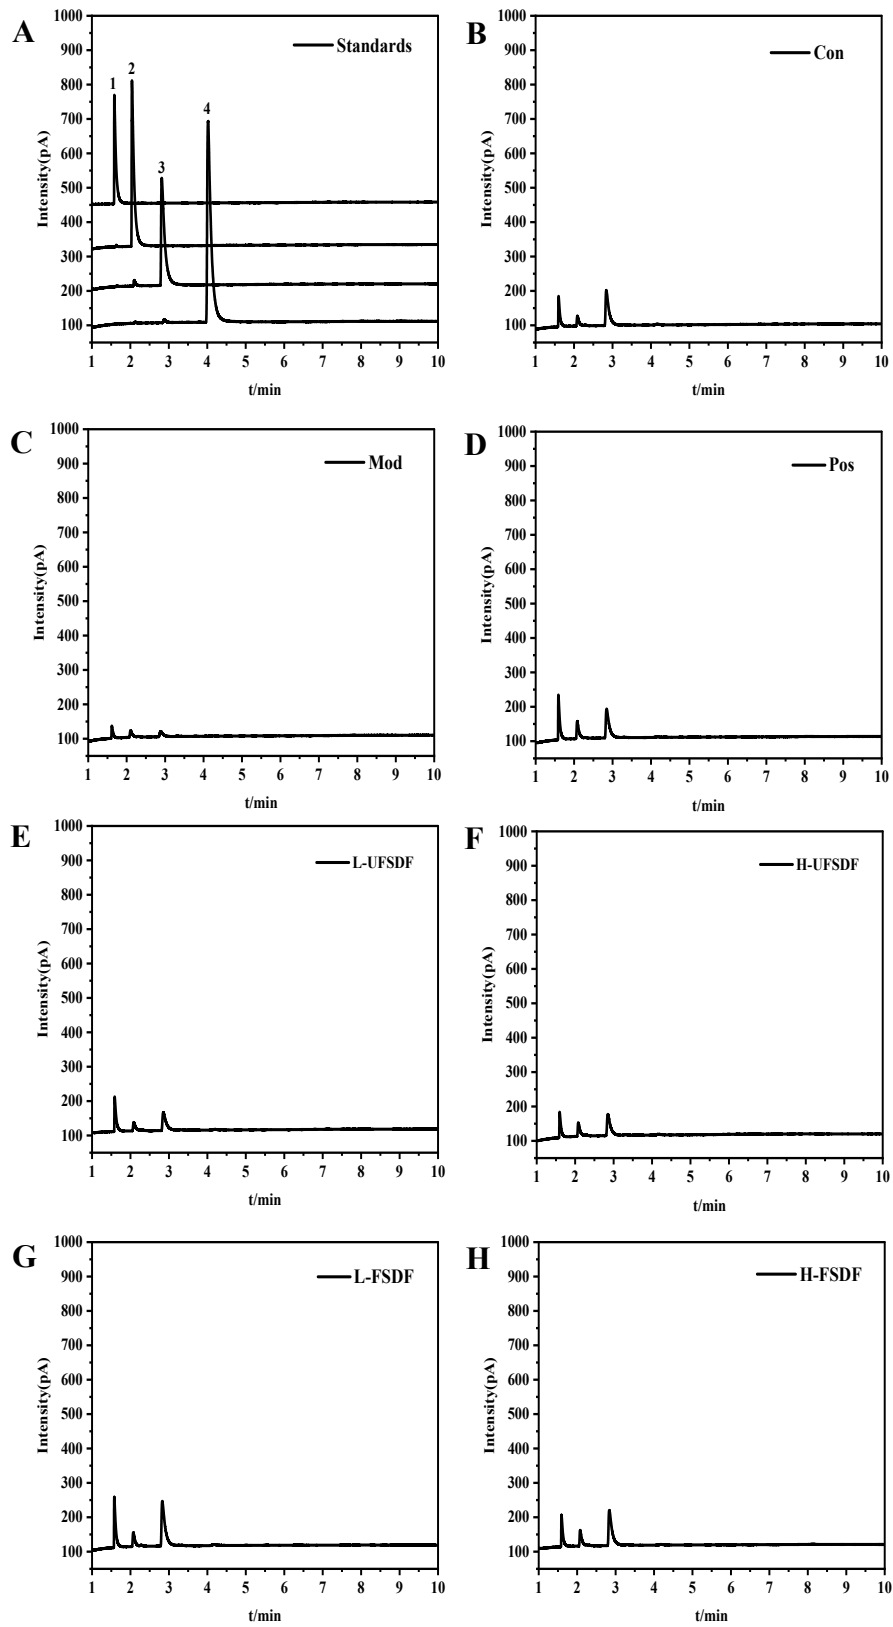

**Fig. S4.** Gas chromatograms of standards (A), Con group (B), Mod group (C) Pos group (D) L-UFSDf group (E) H-UFSDf group (F) L-FSDf group (G) H-FSDf



group (H). Peak identification: 1, acetic acid; 2, propionic acid; 3, butyric acid; 4, valeric acid.
